# Supplementary material for: Meta-analysis of 46,000 germline de novo mutations linked to human inherited disease
Source: Springer Nature journal article supplement (doi:10.1186/s40246-024-00587-8), 2024-02-23

**Additional file 1.** Visual representation of the methodology and analyses performed in this study.

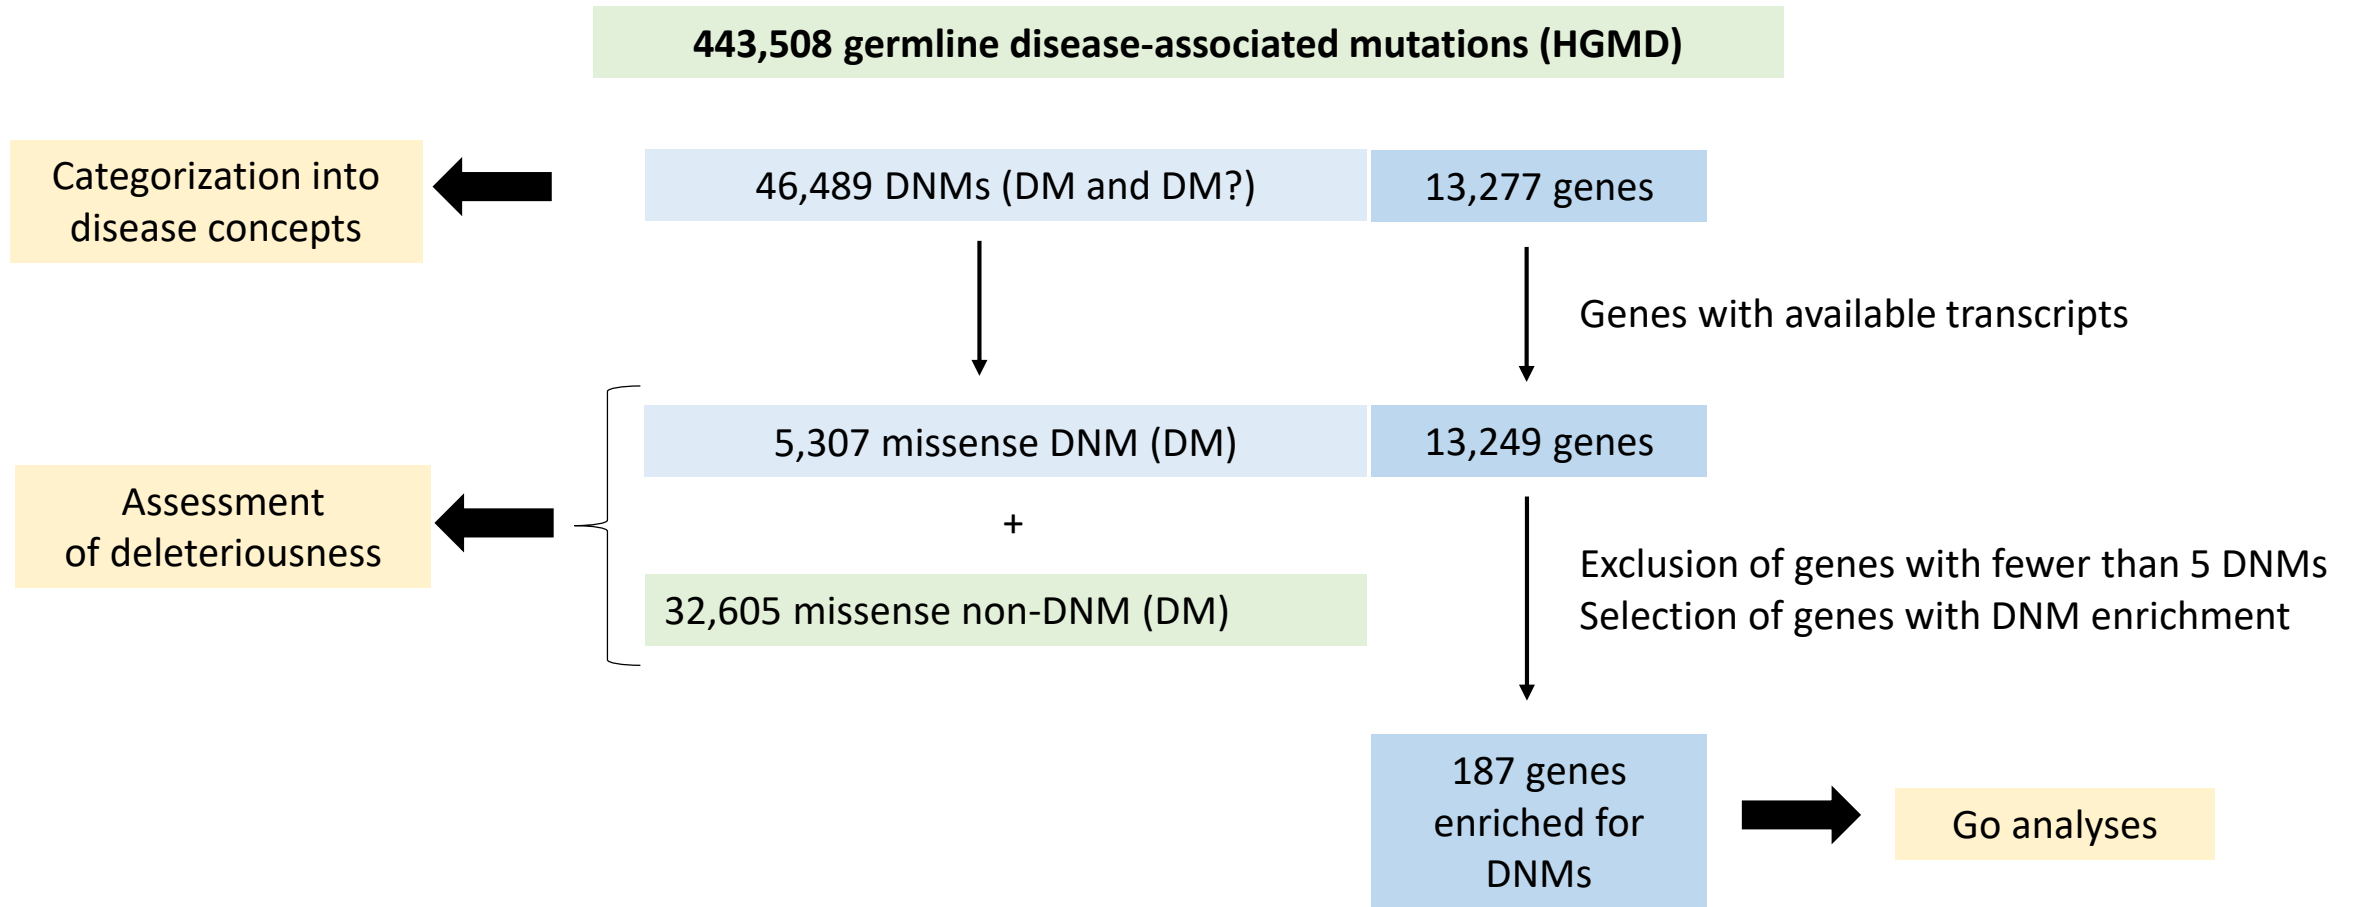

Supplement: MOESM1 [file 40246_2024_587_MOESM1_ESM.pdf]
