# Supplementary material for: Meta-analysis of 46,000 germline de novo mutations linked to human inherited disease
Source: Springer Nature journal article supplement (doi:10.1186/s40246-024-00587-8), 2024-02-23
Supplement: MOESM2 [file 40246_2024_587_MOESM2_ESM.pdf]

**Additional file 3.** 190 enriched biological processes identified based on the analysis of 187 DNM enriched disease genes (Additional file 1) using Gene Ontology (GO) analysis.

|                      |                                                                                    |
|----------------------|------------------------------------------------------------------------------------|
| Annotation Cluster 1 | Enrichment Score: 24.538949456603312                                               |
| Category             | Term                                                                               |
| GOTERM_BP_ALL        | GO:0048731~system development                                                      |
| GOTERM_BP_ALL        | GO:0007275~multicellular organism development                                      |
| GOTERM_BP_ALL        | GO:0007399~nervous system development                                              |
| GOTERM_BP_ALL        | GO:0044707~single-multicellular organism process                                   |
| GOTERM_BP_ALL        | GO:0048856~anatomical structure development                                        |
| GOTERM_BP_ALL        | GO:0044767~single-organism developmental process                                   |
| GOTERM_BP_ALL        | GO:0032502~developmental process                                                   |
| GOTERM_BP_ALL        | GO:0030154~cell differentiation                                                    |
| GOTERM_BP_ALL        | GO:0032501~multicellular organismal process                                        |
| GOTERM_BP_ALL        | GO:0048869~cellular developmental process                                          |
| GOTERM_BP_ALL        | GO:0048513~animal organ development                                                |
| GOTERM_BP_ALL        | GO:0048699~generation of neurons                                                   |
| GOTERM_BP_ALL        | GO:0048468~cell development                                                        |
| GOTERM_BP_ALL        | GO:0022008~neurogenesis                                                            |
|                      |                                                                                    |
| Annotation Cluster 2 | Enrichment Score: 18.06481141083646                                                |
| Category             | Term                                                                               |
| GOTERM_BP_ALL        | GO:0045893~positive regulation of transcription, DNA-templated                     |
| GOTERM_BP_ALL        | GO:1903508~positive regulation of nucleic acid-templated transcription             |
| GOTERM_BP_ALL        | GO:1902680~positive regulation of RNA biosynthetic process                         |
| GOTERM_BP_ALL        | GO:0010628~positive regulation of gene expression                                  |
| GOTERM_BP_ALL        | GO:0045935~positive regulation of nucleobase-containing compound metabolic process |
| GOTERM_BP_ALL        | GO:0009893~positive regulation of metabolic process                                |
| GOTERM_BP_ALL        | GO:0051254~positive regulation of RNA metabolic process                            |
| GOTERM_BP_ALL        | GO:0009891~positive regulation of biosynthetic process                             |
| GOTERM_BP_ALL        | GO:0010557~positive regulation of macromolecule biosynthetic process               |
| GOTERM_BP_ALL        | GO:0051173~positive regulation of nitrogen compound metabolic process              |
| GOTERM_BP_ALL        | GO:0031328~positive regulation of cellular biosynthetic process                    |
| GOTERM_BP_ALL        | GO:0010604~positive regulation of macromolecule metabolic process                  |
| GOTERM_BP_ALL        | GO:0048522~positive regulation of cellular process                                 |
| GOTERM_BP_ALL        | GO:0031325~positive regulation of cellular metabolic process                       |
| GOTERM_BP_ALL        | GO:0097659~nucleic acid-templated transcription                                    |
| GOTERM_BP_ALL        | GO:0051253~negative regulation of RNA metabolic process                            |
| GOTERM_BP_ALL        | GO:0045944~positive regulation of transcription from RNA polymerase II promoter    |
| GOTERM_BP_ALL        | GO:0032774~RNA biosynthetic process                                                |
| GOTERM_BP_ALL        | GO:1903507~negative regulation of nucleic acid-templated transcription             |
| GOTERM_BP_ALL        | GO:0006351~transcription, DNA-templated                                            |
| GOTERM_BP_ALL        | GO:1902679~negative regulation of RNA biosynthetic process                         |
| GOTERM_BP_ALL        | GO:0006366~transcription from RNA polymerase II promoter                           |
| GOTERM_BP_ALL        | GO:0019219~regulation of nucleobase-containing compound metabolic process          |
| GOTERM_BP_ALL        | GO:0051252~regulation of RNA metabolic process                                     |
| GOTERM_BP_ALL        | GO:1903506~regulation of nucleic acid-templated transcription                      |
| GOTERM_BP_ALL        | GO:2001141~regulation of RNA biosynthetic process                                  |

|               |                                                                                    |
|---------------|------------------------------------------------------------------------------------|
| GOTERM_BP_ALL | GO:0045934~negative regulation of nucleobase-containing compound metabolic process |
| GOTERM_BP_ALL | GO:0048518~positive regulation of biological process                               |
| GOTERM_BP_ALL | GO:0045892~negative regulation of transcription, DNA-templated                     |
| GOTERM_BP_ALL | GO:0006355~regulation of transcription, DNA-templated                              |
| GOTERM_BP_ALL | GO:0006357~regulation of transcription from RNA polymerase II promoter             |
| GOTERM_BP_ALL | GO:0034654~nucleobase-containing compound biosynthetic process                     |
| GOTERM_BP_ALL | GO:0018130~heterocycle biosynthetic process                                        |
| GOTERM_BP_ALL | GO:0019438~aromatic compound biosynthetic process                                  |
| GOTERM_BP_ALL | GO:0000122~negative regulation of transcription from RNA polymerase II promoter    |
| GOTERM_BP_ALL | GO:0010468~regulation of gene expression                                           |
| GOTERM_BP_ALL | GO:0051171~regulation of nitrogen compound metabolic process                       |
| GOTERM_BP_ALL | GO:1901362~organic cyclic compound biosynthetic process                            |
| GOTERM_BP_ALL | GO:0060255~regulation of macromolecule metabolic process                           |
| GOTERM_BP_ALL | GO:0019222~regulation of metabolic process                                         |
| GOTERM_BP_ALL | GO:0048523~negative regulation of cellular process                                 |
| GOTERM_BP_ALL | GO:0031326~regulation of cellular biosynthetic process                             |
| GOTERM_BP_ALL | GO:2000112~regulation of cellular macromolecule biosynthetic process               |
| GOTERM_BP_ALL | GO:0031323~regulation of cellular metabolic process                                |
| GOTERM_BP_ALL | GO:0009889~regulation of biosynthetic process                                      |
| GOTERM_BP_ALL | GO:0010556~regulation of macromolecule biosynthetic process                        |
| GOTERM_BP_ALL | GO:0080090~regulation of primary metabolic process                                 |
| GOTERM_BP_ALL | GO:0016070~RNA metabolic process                                                   |
| GOTERM_BP_ALL | GO:0031324~negative regulation of cellular metabolic process                       |
| GOTERM_BP_ALL | GO:0009890~negative regulation of biosynthetic process                             |
| GOTERM_BP_ALL | GO:0044271~cellular nitrogen compound biosynthetic process                         |
| GOTERM_BP_ALL | GO:0048519~negative regulation of biological process                               |
| GOTERM_BP_ALL | GO:0031327~negative regulation of cellular biosynthetic process                    |
| GOTERM_BP_ALL | GO:0051172~negative regulation of nitrogen compound metabolic process              |
| GOTERM_BP_ALL | GO:0010605~negative regulation of macromolecule metabolic process                  |
| GOTERM_BP_ALL | GO:0010558~negative regulation of macromolecule biosynthetic process               |
| GOTERM_BP_ALL | GO:0090304~nucleic acid metabolic process                                          |
| GOTERM_BP_ALL | GO:0034645~cellular macromolecule biosynthetic process                             |
| GOTERM_BP_ALL | GO:2000113~negative regulation of cellular macromolecule biosynthetic process      |
| GOTERM_BP_ALL | GO:0010629~negative regulation of gene expression                                  |
| GOTERM_BP_ALL | GO:0009892~negative regulation of metabolic process                                |
| GOTERM_BP_ALL | GO:0009059~macromolecule biosynthetic process                                      |
| GOTERM_BP_ALL | GO:0010467~gene expression                                                         |
| GOTERM_BP_ALL | GO:0006139~nucleobase-containing compound metabolic process                        |
| GOTERM_BP_ALL | GO:0044249~cellular biosynthetic process                                           |
| GOTERM_BP_ALL | GO:0046483~heterocycle metabolic process                                           |
| GOTERM_BP_ALL | GO:0006725~cellular aromatic compound metabolic process                            |
| GOTERM_BP_ALL | GO:0009058~biosynthetic process                                                    |
| GOTERM_BP_ALL | GO:1901576~organic substance biosynthetic process                                  |
| GOTERM_BP_ALL | GO:1901360~organic cyclic compound metabolic process                               |
| GOTERM_BP_ALL | GO:0044260~cellular macromolecule metabolic process                                |
| GOTERM_BP_ALL | GO:0043170~macromolecule metabolic process                                         |
| GOTERM_BP_ALL | GO:0034641~cellular nitrogen compound metabolic process                            |
| GOTERM_BP_ALL | GO:0006807~nitrogen compound metabolic process                                     |

|                      |                                                               |
|----------------------|---------------------------------------------------------------|
| GOTERM_BP_ALL        | GO:0071704~organic substance metabolic process                |
| GOTERM_BP_ALL        | GO:0008152~metabolic process                                  |
| GOTERM_BP_ALL        | GO:0044238~primary metabolic process                          |
| GOTERM_BP_ALL        | GO:0044237~cellular metabolic process                         |
|                      |                                                               |
| Annotation Cluster 3 | Enrichment Score: 16.402881568405938                          |
| Category             | Term                                                          |
| GOTERM_BP_ALL        | GO:0016043~cellular component organization                    |
| GOTERM_BP_ALL        | GO:0071840~cellular component organization or biogenesis      |
| GOTERM_BP_ALL        | GO:0006996~organelle organization                             |
|                      |                                                               |
| Annotation Cluster 4 | Enrichment Score: 12.887988837315419                          |
| Category             | Term                                                          |
| GOTERM_BP_ALL        | GO:0007267~cell-cell signaling                                |
| GOTERM_BP_ALL        | GO:0007268~chemical synaptic transmission                     |
| GOTERM_BP_ALL        | GO:0098916~anterograde trans-synaptic signaling               |
| GOTERM_BP_ALL        | GO:0050804~modulation of synaptic transmission                |
| GOTERM_BP_ALL        | GO:0099537~trans-synaptic signaling                           |
| GOTERM_BP_ALL        | GO:0099536~synaptic signaling                                 |
| GOTERM_BP_ALL        | GO:0048167~regulation of synaptic plasticity                  |
|                      |                                                               |
| Annotation Cluster 5 | Enrichment Score: 12.791367449280083                          |
| Category             | Term                                                          |
| GOTERM_BP_ALL        | GO:0042221~response to chemical                               |
| GOTERM_BP_ALL        | GO:0010033~response to organic substance                      |
| GOTERM_BP_ALL        | GO:0070887~cellular response to chemical stimulus             |
| GOTERM_BP_ALL        | GO:0071310~cellular response to organic substance             |
| GOTERM_BP_ALL        | GO:0009719~response to endogenous stimulus                    |
| GOTERM_BP_ALL        | GO:0051716~cellular response to stimulus                      |
| GOTERM_BP_ALL        | GO:0071495~cellular response to endogenous stimulus           |
|                      |                                                               |
| Annotation Cluster 6 | Enrichment Score: 12.745786493923193                          |
| Category             | Term                                                          |
| GOTERM_BP_ALL        | GO:0060322~head development                                   |
| GOTERM_BP_ALL        | GO:0007417~central nervous system development                 |
| GOTERM_BP_ALL        | GO:0007420~brain development                                  |
| GOTERM_BP_ALL        | GO:0030900~forebrain development                              |
| GOTERM_BP_ALL        | GO:0021537~telencephalon development                          |
| GOTERM_BP_ALL        | GO:0021987~cerebral cortex development                        |
| GOTERM_BP_ALL        | GO:0021543~pallium development                                |
|                      |                                                               |
| Annotation Cluster 7 | Enrichment Score: 12.032486964535344                          |
| Category             | Term                                                          |
| GOTERM_BP_ALL        | GO:0030154~cell differentiation                               |
| GOTERM_BP_ALL        | GO:0048869~cellular developmental process                     |
| GOTERM_BP_ALL        | GO:0048699~generation of neurons                              |
| GOTERM_BP_ALL        | GO:0048468~cell development                                   |
| GOTERM_BP_ALL        | GO:2000026~regulation of multicellular organismal development |
| GOTERM_BP_ALL        | GO:0022008~neurogenesis                                       |
| GOTERM_BP_ALL        | GO:0045595~regulation of cell differentiation                 |
| GOTERM_BP_ALL        | GO:0050793~regulation of developmental process                |

|                      |                                                                         |
|----------------------|-------------------------------------------------------------------------|
| GOTERM_BP_ALL        | GO:0060284~regulation of cell development                               |
| GOTERM_BP_ALL        | GO:0009653~anatomical structure morphogenesis                           |
| GOTERM_BP_ALL        | GO:0051239~regulation of multicellular organismal process               |
| GOTERM_BP_ALL        | GO:0030182~neuron differentiation                                       |
| GOTERM_BP_ALL        | GO:0045596~negative regulation of cell differentiation                  |
| GOTERM_BP_ALL        | GO:0048666~neuron development                                           |
| GOTERM_BP_ALL        | GO:0050767~regulation of neurogenesis                                   |
| GOTERM_BP_ALL        | GO:0051960~regulation of nervous system development                     |
| GOTERM_BP_ALL        | GO:0051093~negative regulation of developmental process                 |
| GOTERM_BP_ALL        | GO:0051094~positive regulation of developmental process                 |
| GOTERM_BP_ALL        | GO:0031175~neuron projection development                                |
| GOTERM_BP_ALL        | GO:0051241~negative regulation of multicellular organismal process      |
| GOTERM_BP_ALL        | GO:0032990~cell part morphogenesis                                      |
| GOTERM_BP_ALL        | GO:0048667~cell morphogenesis involved in neuron differentiation        |
| GOTERM_BP_ALL        | GO:0045597~positive regulation of cell differentiation                  |
| GOTERM_BP_ALL        | GO:0048812~neuron projection morphogenesis                              |
| GOTERM_BP_ALL        | GO:0048858~cell projection morphogenesis                                |
| GOTERM_BP_ALL        | GO:0000904~cell morphogenesis involved in differentiation               |
| GOTERM_BP_ALL        | GO:0030030~cell projection organization                                 |
| GOTERM_BP_ALL        | GO:0045664~regulation of neuron differentiation                         |
| GOTERM_BP_ALL        | GO:0032989~cellular component morphogenesis                             |
| GOTERM_BP_ALL        | GO:0007409~axonogenesis                                                 |
| GOTERM_BP_ALL        | GO:0061564~axon development                                             |
| GOTERM_BP_ALL        | GO:0000902~cell morphogenesis                                           |
| GOTERM_BP_ALL        | GO:0051240~positive regulation of multicellular organismal process      |
| GOTERM_BP_ALL        | GO:0010720~positive regulation of cell development                      |
| GOTERM_BP_ALL        | GO:0022603~regulation of anatomical structure morphogenesis             |
| GOTERM_BP_ALL        | GO:0050769~positive regulation of neurogenesis                          |
| GOTERM_BP_ALL        | GO:0051962~positive regulation of nervous system development            |
| GOTERM_BP_ALL        | GO:0010769~regulation of cell morphogenesis involved in differentiation |
| GOTERM_BP_ALL        | GO:0031344~regulation of cell projection organization                   |
| GOTERM_BP_ALL        | GO:0010975~regulation of neuron projection development                  |
| GOTERM_BP_ALL        | GO:0045666~positive regulation of neuron differentiation                |
| GOTERM_BP_ALL        | GO:0022604~regulation of cell morphogenesis                             |
|                      |                                                                         |
| Annotation Cluster 8 | Enrichment Score: 11.883854154347821                                    |
| Category             | Term                                                                    |
| GOTERM_BP_ALL        | GO:0008219~cell death                                                   |
| GOTERM_BP_ALL        | GO:0006915~apoptotic process                                            |
| GOTERM_BP_ALL        | GO:0012501~programmed cell death                                        |
| GOTERM_BP_ALL        | GO:0010941~regulation of cell death                                     |
| GOTERM_BP_ALL        | GO:0042981~regulation of apoptotic process                              |
| GOTERM_BP_ALL        | GO:0043067~regulation of programmed cell death                          |
| GOTERM_BP_ALL        | GO:0043066~negative regulation of apoptotic process                     |
| GOTERM_BP_ALL        | GO:0060548~negative regulation of cell death                            |
| GOTERM_BP_ALL        | GO:0043069~negative regulation of programmed cell death                 |
|                      |                                                                         |
| Annotation Cluster 9 | Enrichment Score: 11.617721454578012                                    |
| Category             | Term                                                                    |
| GOTERM_BP_ALL        | GO:0050789~regulation of biological process                             |
| GOTERM_BP_ALL        | GO:0050794~regulation of cellular process                               |

|                       |                                                                     |
|-----------------------|---------------------------------------------------------------------|
| GOTERM_BP_ALL         | GO:0065007~biological regulation                                    |
| GOTERM_BP_ALL         | GO:0009987~cellular process                                         |
|                       |                                                                     |
| Annotation Cluster 10 | Enrichment Score: 10.877350386983192                                |
| Category              | Term                                                                |
| GOTERM_BP_ALL         | GO:0006325~chromatin organization                                   |
| GOTERM_BP_ALL         | GO:0051276~chromosome organization                                  |
| GOTERM_BP_ALL         | GO:0033044~regulation of chromosome organization                    |
| GOTERM_BP_ALL         | GO:0006338~chromatin remodeling                                     |
| GOTERM_BP_ALL         | GO:0016569~covalent chromatin modification                          |
| GOTERM_BP_ALL         | GO:0006259~DNA metabolic process                                    |
| GOTERM_BP_ALL         | GO:0051052~regulation of DNA metabolic process                      |
|                       |                                                                     |
| Annotation Cluster 11 | Enrichment Score: 10.777572381307927                                |
| Category              | Term                                                                |
| GOTERM_BP_ALL         | GO:0006996~organelle organization                                   |
| GOTERM_BP_ALL         | GO:0033043~regulation of organelle organization                     |
| GOTERM_BP_ALL         | GO:1902589~single-organism organelle organization                   |
|                       |                                                                     |
| Annotation Cluster 12 | Enrichment Score: 9.870165680795049                                 |
| Category              | Term                                                                |
| GOTERM_BP_ALL         | GO:0009887~animal organ morphogenesis                               |
| GOTERM_BP_ALL         | GO:0009790~embryo development                                       |
| GOTERM_BP_ALL         | GO:0035295~tube development                                         |
| GOTERM_BP_ALL         | GO:0048729~tissue morphogenesis                                     |
| GOTERM_BP_ALL         | GO:0009888~tissue development                                       |
| GOTERM_BP_ALL         | GO:0048598~embryonic morphogenesis                                  |
| GOTERM_BP_ALL         | GO:0035239~tube morphogenesis                                       |
| GOTERM_BP_ALL         | GO:0002009~morphogenesis of an epithelium                           |
| GOTERM_BP_ALL         | GO:0060429~epithelium development                                   |
| GOTERM_BP_ALL         | GO:0043009~chordate embryonic development                           |
| GOTERM_BP_ALL         | GO:0009792~embryo development ending in birth or egg hatching       |
| GOTERM_BP_ALL         | GO:0048646~anatomical structure formation involved in morphogenesis |
| GOTERM_BP_ALL         | GO:0048568~embryonic organ development                              |
| GOTERM_BP_ALL         | GO:0060562~epithelial tube morphogenesis                            |
| GOTERM_BP_ALL         | GO:0001655~urogenital system development                            |
| GOTERM_BP_ALL         | GO:0072001~renal system development                                 |
| GOTERM_BP_ALL         | GO:0001701~in utero embryonic development                           |
| GOTERM_BP_ALL         | GO:0030855~epithelial cell differentiation                          |
|                       |                                                                     |
| Annotation Cluster 13 | Enrichment Score: 9.65995643564602                                  |
| Category              | Term                                                                |
| GOTERM_BP_ALL         | GO:0051128~regulation of cellular component organization            |
| GOTERM_BP_ALL         | GO:0033043~regulation of organelle organization                     |
| GOTERM_BP_ALL         | GO:0051130~positive regulation of cellular component organization   |
| GOTERM_BP_ALL         | GO:0010638~positive regulation of organelle organization            |
|                       |                                                                     |
| Annotation Cluster 14 | Enrichment Score: 8.563799367853306                                 |
| Category              | Term                                                                |
| GOTERM_BP_ALL         | GO:0010646~regulation of cell communication                         |
| GOTERM_BP_ALL         | GO:0023051~regulation of signaling                                  |

|                       |                                                                      |
|-----------------------|----------------------------------------------------------------------|
| GOTERM_BP_ALL         | GO:0007154~cell communication                                        |
| GOTERM_BP_ALL         | GO:0023052~signaling                                                 |
| GOTERM_BP_ALL         | GO:0044700~single organism signaling                                 |
| GOTERM_BP_ALL         | GO:0051716~cellular response to stimulus                             |
| GOTERM_BP_ALL         | GO:0010647~positive regulation of cell communication                 |
| GOTERM_BP_ALL         | GO:0023056~positive regulation of signaling                          |
| GOTERM_BP_ALL         | GO:0031399~regulation of protein modification process                |
| GOTERM_BP_ALL         | GO:0048583~regulation of response to stimulus                        |
| GOTERM_BP_ALL         | GO:0009966~regulation of signal transduction                         |
| GOTERM_BP_ALL         | GO:0050896~response to stimulus                                      |
| GOTERM_BP_ALL         | GO:0048584~positive regulation of response to stimulus               |
| GOTERM_BP_ALL         | GO:0035556~intracellular signal transduction                         |
| GOTERM_BP_ALL         | GO:0009967~positive regulation of signal transduction                |
| GOTERM_BP_ALL         | GO:0007165~signal transduction                                       |
| GOTERM_BP_ALL         | GO:0032268~regulation of cellular protein metabolic process          |
| GOTERM_BP_ALL         | GO:0007166~cell surface receptor signaling pathway                   |
| GOTERM_BP_ALL         | GO:0051246~regulation of protein metabolic process                   |
| GOTERM_BP_ALL         | GO:0051247~positive regulation of protein metabolic process          |
| GOTERM_BP_ALL         | GO:0032270~positive regulation of cellular protein metabolic process |
| GOTERM_BP_ALL         | GO:1902531~regulation of intracellular signal transduction           |
| GOTERM_BP_ALL         | GO:0001932~regulation of protein phosphorylation                     |
| GOTERM_BP_ALL         | GO:1902533~positive regulation of intracellular signal transduction  |
|                       |                                                                      |
| Annotation Cluster 15 | Enrichment Score: 8.522382339024787                                  |
| Category              | Term                                                                 |
| GOTERM_BP_ALL         | GO:0045596~negative regulation of cell differentiation               |
| GOTERM_BP_ALL         | GO:0008283~cell proliferation                                        |
| GOTERM_BP_ALL         | GO:0050673~epithelial cell proliferation                             |
| GOTERM_BP_ALL         | GO:0042127~regulation of cell proliferation                          |
| GOTERM_BP_ALL         | GO:0050678~regulation of epithelial cell proliferation               |
| GOTERM_BP_ALL         | GO:0008284~positive regulation of cell proliferation                 |
| GOTERM_BP_ALL         | GO:0008285~negative regulation of cell proliferation                 |
| GOTERM_BP_ALL         | GO:0050680~negative regulation of epithelial cell proliferation      |
|                       |                                                                      |
| Annotation Cluster 16 | Enrichment Score: 7.180668581687825                                  |
| Category              | Term                                                                 |
| GOTERM_BP_ALL         | GO:0061061~muscle structure development                              |
| GOTERM_BP_ALL         | GO:0014706~striated muscle tissue development                        |
| GOTERM_BP_ALL         | GO:0007517~muscle organ development                                  |
| GOTERM_BP_ALL         | GO:0042692~muscle cell differentiation                               |
| GOTERM_BP_ALL         | GO:0060537~muscle tissue development                                 |
| GOTERM_BP_ALL         | GO:0007519~skeletal muscle tissue development                        |
| GOTERM_BP_ALL         | GO:0060538~skeletal muscle organ development                         |
| GOTERM_BP_ALL         | GO:0007507~heart development                                         |
| GOTERM_BP_ALL         | GO:0072359~circulatory system development                            |
| GOTERM_BP_ALL         | GO:0051146~striated muscle cell differentiation                      |
|                       |                                                                      |
| Annotation Cluster 17 | Enrichment Score: 7.125690185410263                                  |
| Category              | Term                                                                 |
| GOTERM_BP_ALL         | GO:0051402~neuron apoptotic process                                  |
| GOTERM_BP_ALL         | GO:0070997~neuron death                                              |

|                       |                                                            |
|-----------------------|------------------------------------------------------------|
| GOTERM_BP_ALL         | GO:0043523~regulation of neuron apoptotic process          |
| GOTERM_BP_ALL         | GO:1901214~regulation of neuron death                      |
| GOTERM_BP_ALL         | GO:0043524~negative regulation of neuron apoptotic process |
| GOTERM_BP_ALL         | GO:1901215~negative regulation of neuron death             |
|                       |                                                            |
| Annotation Cluster 18 | Enrichment Score: 7.034466528327722                        |
| Category              | Term                                                       |
| GOTERM_BP_ALL         | GO:0065008~regulation of biological quality                |
| GOTERM_BP_ALL         | GO:0051179~localization                                    |
| GOTERM_BP_ALL         | GO:0032879~regulation of localization                      |
| GOTERM_BP_ALL         | GO:0051049~regulation of transport                         |
| GOTERM_BP_ALL         | GO:0051641~cellular localization                           |
| GOTERM_BP_ALL         | GO:0044765~single-organism transport                       |
| GOTERM_BP_ALL         | GO:1902578~single-organism localization                    |
| GOTERM_BP_ALL         | GO:0006810~transport                                       |
| GOTERM_BP_ALL         | GO:0051234~establishment of localization                   |
| GOTERM_BP_ALL         | GO:1902580~single-organism cellular localization           |
| GOTERM_BP_ALL         | GO:0051649~establishment of localization in cell           |
| GOTERM_BP_ALL         | GO:0046907~intracellular transport                         |
|                       |                                                            |
| Annotation Cluster 19 | Enrichment Score: 6.840420905191419                        |
| Category              | Term                                                       |
| GOTERM_BP_ALL         | GO:0050890~cognition                                       |
| GOTERM_BP_ALL         | GO:0007611~learning or memory                              |
| GOTERM_BP_ALL         | GO:0044708~single-organism behavior                        |
| GOTERM_BP_ALL         | GO:0007610~behavior                                        |
| GOTERM_BP_ALL         | GO:0008306~associative learning                            |
| GOTERM_BP_ALL         | GO:0003008~system process                                  |
| GOTERM_BP_ALL         | GO:0007612~learning                                        |
| GOTERM_BP_ALL         | GO:0008542~visual learning                                 |
| GOTERM_BP_ALL         | GO:0007632~visual behavior                                 |
| GOTERM_BP_ALL         | GO:0050877~neurological system process                     |
| GOTERM_BP_ALL         | GO:0048168~regulation of neuronal synaptic plasticity      |
| GOTERM_BP_ALL         | GO:0009628~response to abiotic stimulus                    |
| GOTERM_BP_ALL         | GO:0009314~response to radiation                           |
| GOTERM_BP_ALL         | GO:0009416~response to light stimulus                      |
|                       |                                                            |
| Annotation Cluster 20 | Enrichment Score: 6.275479568404395                        |
| Category              | Term                                                       |
| GOTERM_BP_ALL         | GO:0045165~cell fate commitment                            |
| GOTERM_BP_ALL         | GO:0048568~embryonic organ development                     |
| GOTERM_BP_ALL         | GO:0007389~pattern specification process                   |
| GOTERM_BP_ALL         | GO:0003002~regionalization                                 |
| GOTERM_BP_ALL         | GO:0048754~branching morphogenesis of an epithelial tube   |
| GOTERM_BP_ALL         | GO:0009952~anterior/posterior pattern specification        |
|                       |                                                            |
| Annotation Cluster 21 | Enrichment Score: 6.254353113865885                        |
| Category              | Term                                                       |
| GOTERM_BP_ALL         | GO:0009719~response to endogenous stimulus                 |
| GOTERM_BP_ALL         | GO:0010243~response to organonitrogen compound             |
| GOTERM_BP_ALL         | GO:1901700~response to oxygen-containing compound          |

|                       |                                                               |
|-----------------------|---------------------------------------------------------------|
| GOTERM_BP_ALL         | GO:1901698~response to nitrogen compound                      |
| GOTERM_BP_ALL         | GO:0071495~cellular response to endogenous stimulus           |
| GOTERM_BP_ALL         | GO:0071417~cellular response to organonitrogen compound       |
| GOTERM_BP_ALL         | GO:1901699~cellular response to nitrogen compound             |
| GOTERM_BP_ALL         | GO:0009725~response to hormone                                |
| GOTERM_BP_ALL         | GO:1901701~cellular response to oxygen-containing compound    |
| GOTERM_BP_ALL         | GO:0032870~cellular response to hormone stimulus              |
| GOTERM_BP_ALL         | GO:1901652~response to peptide                                |
| GOTERM_BP_ALL         | GO:0043434~response to peptide hormone                        |
| GOTERM_BP_ALL         | GO:1901653~cellular response to peptide                       |
| GOTERM_BP_ALL         | GO:0071375~cellular response to peptide hormone stimulus      |
| GOTERM_BP_ALL         | GO:0032868~response to insulin                                |
| GOTERM_BP_ALL         | GO:0032869~cellular response to insulin stimulus              |
|                       |                                                               |
| Annotation Cluster 22 | Enrichment Score: 5.997404981847557                           |
| Category              | Term                                                          |
| GOTERM_BP_ALL         | GO:0043066~negative regulation of apoptotic process           |
| GOTERM_BP_ALL         | GO:0009966~regulation of signal transduction                  |
| GOTERM_BP_ALL         | GO:0043069~negative regulation of programmed cell death       |
| GOTERM_BP_ALL         | GO:0097190~apoptotic signaling pathway                        |
| GOTERM_BP_ALL         | GO:2001233~regulation of apoptotic signaling pathway          |
| GOTERM_BP_ALL         | GO:0010648~negative regulation of cell communication          |
| GOTERM_BP_ALL         | GO:0023057~negative regulation of signaling                   |
| GOTERM_BP_ALL         | GO:0009968~negative regulation of signal transduction         |
| GOTERM_BP_ALL         | GO:0048585~negative regulation of response to stimulus        |
| GOTERM_BP_ALL         | GO:2001234~negative regulation of apoptotic signaling pathway |
|                       |                                                               |
| Annotation Cluster 23 | Enrichment Score: 5.831684249050661                           |
| Category              | Term                                                          |
| GOTERM_BP_ALL         | GO:0042063~gliogenesis                                        |
| GOTERM_BP_ALL         | GO:0014009~glial cell proliferation                           |
| GOTERM_BP_ALL         | GO:0060251~regulation of glial cell proliferation             |
| GOTERM_BP_ALL         | GO:0014013~regulation of gliogenesis                          |
| GOTERM_BP_ALL         | GO:0060253~negative regulation of glial cell proliferation    |
| GOTERM_BP_ALL         | GO:0014014~negative regulation of gliogenesis                 |
| GOTERM_BP_ALL         | GO:0021782~glial cell development                             |
| GOTERM_BP_ALL         | GO:0014015~positive regulation of gliogenesis                 |
|                       |                                                               |
| Annotation Cluster 24 | Enrichment Score: 5.729004937957952                           |
| Category              | Term                                                          |
| GOTERM_BP_ALL         | GO:0040007~growth                                             |
| GOTERM_BP_ALL         | GO:0016049~cell growth                                        |
| GOTERM_BP_ALL         | GO:0045927~positive regulation of growth                      |
| GOTERM_BP_ALL         | GO:0030307~positive regulation of cell growth                 |
| GOTERM_BP_ALL         | GO:0040008~regulation of growth                               |
| GOTERM_BP_ALL         | GO:0001558~regulation of cell growth                          |
|                       |                                                               |
| Annotation Cluster 25 | Enrichment Score: 5.527060486081129                           |
| Category              | Term                                                          |
| GOTERM_BP_ALL         | GO:0006473~protein acetylation                                |
| GOTERM_BP_ALL         | GO:0016569~covalent chromatin modification                    |



|                       |                                                                                    |
|-----------------------|------------------------------------------------------------------------------------|
| GOTERM_BP_ALL         | GO:0043543~protein acylation                                                       |
| GOTERM_BP_ALL         | GO:0016570~histone modification                                                    |
| GOTERM_BP_ALL         | GO:0018205~peptidyl-lysine modification                                            |
| GOTERM_BP_ALL         | GO:0018193~peptidyl-amino acid modification                                        |
| GOTERM_BP_ALL         | GO:0018394~peptidyl-lysine acetylation                                             |
| GOTERM_BP_ALL         | GO:0006475~internal protein amino acid acetylation                                 |
| GOTERM_BP_ALL         | GO:0031056~regulation of histone modification                                      |
| GOTERM_BP_ALL         | GO:1901983~regulation of protein acetylation                                       |
| GOTERM_BP_ALL         | GO:0018393~internal peptidyl-lysine acetylation                                    |
| GOTERM_BP_ALL         | GO:0016573~histone acetylation                                                     |
| GOTERM_BP_ALL         | GO:2000756~regulation of peptidyl-lysine acetylation                               |
| GOTERM_BP_ALL         | GO:0035065~regulation of histone acetylation                                       |
| GOTERM_BP_ALL         | GO:2001251~negative regulation of chromosome organization                          |
| GOTERM_BP_ALL         | GO:1905268~negative regulation of chromatin organization                           |
| GOTERM_BP_ALL         | GO:0043967~histone H4 acetylation                                                  |
| GOTERM_BP_ALL         | GO:0031057~negative regulation of histone modification                             |
|                       |                                                                                    |
| Annotation Cluster 26 | Enrichment Score: 5.254027834808341                                                |
| Category              | Term                                                                               |
| GOTERM_BP_ALL         | GO:1905114~cell surface receptor signaling pathway involved in cell-cell signaling |
| GOTERM_BP_ALL         | GO:0016055~Wnt signaling pathway                                                   |
| GOTERM_BP_ALL         | GO:0198738~cell-cell signaling by wnt                                              |
| GOTERM_BP_ALL         | GO:0060070~canonical Wnt signaling pathway                                         |
| GOTERM_BP_ALL         | GO:0030111~regulation of Wnt signaling pathway                                     |
| GOTERM_BP_ALL         | GO:0030177~positive regulation of Wnt signaling pathway                            |
| GOTERM_BP_ALL         | GO:0060828~regulation of canonical Wnt signaling pathway                           |
| GOTERM_BP_ALL         | GO:0090263~positive regulation of canonical Wnt signaling pathway                  |
|                       |                                                                                    |
| Annotation Cluster 27 | Enrichment Score: 5.2492917464875495                                               |
| Category              | Term                                                                               |
| GOTERM_BP_ALL         | GO:0022607~cellular component assembly                                             |
| GOTERM_BP_ALL         | GO:0044085~cellular component biogenesis                                           |
| GOTERM_BP_ALL         | GO:0043933~macromolecular complex subunit organization                             |
| GOTERM_BP_ALL         | GO:0065003~macromolecular complex assembly                                         |
| GOTERM_BP_ALL         | GO:0071822~protein complex subunit organization                                    |
| GOTERM_BP_ALL         | GO:0070271~protein complex biogenesis                                              |
| GOTERM_BP_ALL         | GO:0006461~protein complex assembly                                                |
| GOTERM_BP_ALL         | GO:0043254~regulation of protein complex assembly                                  |
|                       |                                                                                    |
| Annotation Cluster 28 | Enrichment Score: 5.243960364631991                                                |
| Category              | Term                                                                               |
| GOTERM_BP_ALL         | GO:0048663~neuron fate commitment                                                  |
| GOTERM_BP_ALL         | GO:0001708~cell fate specification                                                 |
| GOTERM_BP_ALL         | GO:0030902~hindbrain development                                                   |
|                       |                                                                                    |
| Annotation Cluster 29 | Enrichment Score: 5.100968316465785                                                |
| Category              | Term                                                                               |
| GOTERM_BP_ALL         | GO:1901698~response to nitrogen compound                                           |
| GOTERM_BP_ALL         | GO:0014070~response to organic cyclic compound                                     |
| GOTERM_BP_ALL         | GO:0071407~cellular response to organic cyclic compound                            |

|                       |                                                                      |
|-----------------------|----------------------------------------------------------------------|
| GOTERM_BP_ALL         | GO:0033993~response to lipid                                         |
| GOTERM_BP_ALL         | GO:0071396~cellular response to lipid                                |
|                       |                                                                      |
| Annotation Cluster 30 | Enrichment Score: 4.9379867338644425                                 |
| Category              | Term                                                                 |
| GOTERM_BP_ALL         | GO:0031399~regulation of protein modification process                |
| GOTERM_BP_ALL         | GO:0009966~regulation of signal transduction                         |
| GOTERM_BP_ALL         | GO:0006464~cellular protein modification process                     |
| GOTERM_BP_ALL         | GO:0036211~protein modification process                              |
| GOTERM_BP_ALL         | GO:0065009~regulation of molecular function                          |
| GOTERM_BP_ALL         | GO:0035556~intracellular signal transduction                         |
| GOTERM_BP_ALL         | GO:0009967~positive regulation of signal transduction                |
| GOTERM_BP_ALL         | GO:0043412~macromolecule modification                                |
| GOTERM_BP_ALL         | GO:0032268~regulation of cellular protein metabolic process          |
| GOTERM_BP_ALL         | GO:0051246~regulation of protein metabolic process                   |
| GOTERM_BP_ALL         | GO:0044093~positive regulation of molecular function                 |
| GOTERM_BP_ALL         | GO:0051338~regulation of transferase activity                        |
| GOTERM_BP_ALL         | GO:0051247~positive regulation of protein metabolic process          |
| GOTERM_BP_ALL         | GO:0032270~positive regulation of cellular protein metabolic process |
| GOTERM_BP_ALL         | GO:0044267~cellular protein metabolic process                        |
| GOTERM_BP_ALL         | GO:1902531~regulation of intracellular signal transduction           |
| GOTERM_BP_ALL         | GO:0050790~regulation of catalytic activity                          |
| GOTERM_BP_ALL         | GO:0042325~regulation of phosphorylation                             |
| GOTERM_BP_ALL         | GO:0031401~positive regulation of protein modification process       |
| GOTERM_BP_ALL         | GO:0006468~protein phosphorylation                                   |
| GOTERM_BP_ALL         | GO:0001932~regulation of protein phosphorylation                     |
| GOTERM_BP_ALL         | GO:0019220~regulation of phosphate metabolic process                 |
| GOTERM_BP_ALL         | GO:0051174~regulation of phosphorus metabolic process                |
| GOTERM_BP_ALL         | GO:0019538~protein metabolic process                                 |
| GOTERM_BP_ALL         | GO:0016310~phosphorylation                                           |
| GOTERM_BP_ALL         | GO:0043549~regulation of kinase activity                             |
| GOTERM_BP_ALL         | GO:0006796~phosphate-containing compound metabolic process           |
| GOTERM_BP_ALL         | GO:0006793~phosphorus metabolic process                              |
| GOTERM_BP_ALL         | GO:1902533~positive regulation of intracellular signal transduction  |
| GOTERM_BP_ALL         | GO:0043085~positive regulation of catalytic activity                 |
| GOTERM_BP_ALL         | GO:0045859~regulation of protein kinase activity                     |
| GOTERM_BP_ALL         | GO:0042327~positive regulation of phosphorylation                    |
| GOTERM_BP_ALL         | GO:0010562~positive regulation of phosphorus metabolic process       |
| GOTERM_BP_ALL         | GO:0045937~positive regulation of phosphate metabolic process        |
| GOTERM_BP_ALL         | GO:0051347~positive regulation of transferase activity               |
| GOTERM_BP_ALL         | GO:0001934~positive regulation of protein phosphorylation            |
| GOTERM_BP_ALL         | GO:0000165~MAPK cascade                                              |
| GOTERM_BP_ALL         | GO:0023014~signal transduction by protein phosphorylation            |
| GOTERM_BP_ALL         | GO:0043408~regulation of MAPK cascade                                |
| GOTERM_BP_ALL         | GO:0033674~positive regulation of kinase activity                    |
| GOTERM_BP_ALL         | GO:0044710~single-organism metabolic process                         |
| GOTERM_BP_ALL         | GO:0045860~positive regulation of protein kinase activity            |
| GOTERM_BP_ALL         | GO:0043410~positive regulation of MAPK cascade                       |
|                       |                                                                      |
| Annotation Cluster 31 | Enrichment Score: 4.78213385770065                                   |
| Category              | Term                                                                 |

|                       |                                                                           |
|-----------------------|---------------------------------------------------------------------------|
| GOTERM_BP_ALL         | GO:0040011~locomotion                                                     |
| GOTERM_BP_ALL         | GO:0006928~movement of cell or subcellular component                      |
| GOTERM_BP_ALL         | GO:0016477~cell migration                                                 |
| GOTERM_BP_ALL         | GO:0051674~localization of cell                                           |
| GOTERM_BP_ALL         | GO:0048870~cell motility                                                  |
| GOTERM_BP_ALL         | GO:0040012~regulation of locomotion                                       |
| GOTERM_BP_ALL         | GO:0051270~regulation of cellular component movement                      |
| GOTERM_BP_ALL         | GO:0090130~tissue migration                                               |
| GOTERM_BP_ALL         | GO:0030334~regulation of cell migration                                   |
| GOTERM_BP_ALL         | GO:0001667~ameboidal-type cell migration                                  |
| GOTERM_BP_ALL         | GO:2000145~regulation of cell motility                                    |
| GOTERM_BP_ALL         | GO:0010594~regulation of endothelial cell migration                       |
| GOTERM_BP_ALL         | GO:0043542~endothelial cell migration                                     |
| GOTERM_BP_ALL         | GO:0010632~regulation of epithelial cell migration                        |
| GOTERM_BP_ALL         | GO:0010631~epithelial cell migration                                      |
| GOTERM_BP_ALL         | GO:0090132~epithelium migration                                           |
| GOTERM_BP_ALL         | GO:0040017~positive regulation of locomotion                              |
| GOTERM_BP_ALL         | GO:0051272~positive regulation of cellular component movement             |
| GOTERM_BP_ALL         | GO:0043535~regulation of blood vessel endothelial cell migration          |
| GOTERM_BP_ALL         | GO:0030335~positive regulation of cell migration                          |
| GOTERM_BP_ALL         | GO:2000147~positive regulation of cell motility                           |
| GOTERM_BP_ALL         | GO:2000146~negative regulation of cell motility                           |
| GOTERM_BP_ALL         | GO:0043534~blood vessel endothelial cell migration                        |
| GOTERM_BP_ALL         | GO:0010595~positive regulation of endothelial cell migration              |
| GOTERM_BP_ALL         | GO:0051271~negative regulation of cellular component movement             |
| GOTERM_BP_ALL         | GO:0030336~negative regulation of cell migration                          |
| GOTERM_BP_ALL         | GO:0040013~negative regulation of locomotion                              |
| GOTERM_BP_ALL         | GO:0010633~negative regulation of epithelial cell migration               |
| GOTERM_BP_ALL         | GO:0010634~positive regulation of epithelial cell migration               |
| GOTERM_BP_ALL         | GO:0001936~regulation of endothelial cell proliferation                   |
| GOTERM_BP_ALL         | GO:0001935~endothelial cell proliferation                                 |
| GOTERM_BP_ALL         | GO:0010596~negative regulation of endothelial cell migration              |
| GOTERM_BP_ALL         | GO:0043537~negative regulation of blood vessel endothelial cell migration |
|                       |                                                                           |
| Annotation Cluster 32 | Enrichment Score: 4.756134068385471                                       |
| Category              | Term                                                                      |
| GOTERM_BP_ALL         | GO:0060562~epithelial tube morphogenesis                                  |
| GOTERM_BP_ALL         | GO:0035148~tube formation                                                 |
| GOTERM_BP_ALL         | GO:0001838~embryonic epithelial tube formation                            |
| GOTERM_BP_ALL         | GO:0072175~epithelial tube formation                                      |
| GOTERM_BP_ALL         | GO:0016331~morphogenesis of embryonic epithelium                          |
| GOTERM_BP_ALL         | GO:0021915~neural tube development                                        |
| GOTERM_BP_ALL         | GO:0001841~neural tube formation                                          |
| GOTERM_BP_ALL         | GO:0001843~neural tube closure                                            |
| GOTERM_BP_ALL         | GO:0060606~tube closure                                                   |
| GOTERM_BP_ALL         | GO:0014020~primary neural tube formation                                  |
|                       |                                                                           |
| Annotation Cluster 33 | Enrichment Score: 4.643197539293499                                       |
| Category              | Term                                                                      |
| GOTERM_BP_ALL         | GO:0007409~axonogenesis                                                   |
| GOTERM_BP_ALL         | GO:0061564~axon development                                               |

|                       |                                                                             |
|-----------------------|-----------------------------------------------------------------------------|
| GOTERM_BP_ALL         | GO:0006935~chemotaxis                                                       |
| GOTERM_BP_ALL         | GO:0042330~taxis                                                            |
| GOTERM_BP_ALL         | GO:0007411~axon guidance                                                    |
| GOTERM_BP_ALL         | GO:0097485~neuron projection guidance                                       |
|                       |                                                                             |
| Annotation Cluster 34 | Enrichment Score: 4.536570590762885                                         |
| Category              | Term                                                                        |
| GOTERM_BP_ALL         | GO:0048646~anatomical structure formation involved in morphogenesis         |
| GOTERM_BP_ALL         | GO:0072359~circulatory system development                                   |
| GOTERM_BP_ALL         | GO:0001568~blood vessel development                                         |
| GOTERM_BP_ALL         | GO:0048514~blood vessel morphogenesis                                       |
| GOTERM_BP_ALL         | GO:0072358~cardiovascular system development                                |
| GOTERM_BP_ALL         | GO:0001944~vasculature development                                          |
| GOTERM_BP_ALL         | GO:0001525~angiogenesis                                                     |
|                       |                                                                             |
| Annotation Cluster 35 | Enrichment Score: 4.531912192479839                                         |
| Category              | Term                                                                        |
| GOTERM_BP_ALL         | GO:0007423~sensory organ development                                        |
| GOTERM_BP_ALL         | GO:0048562~embryonic organ morphogenesis                                    |
| GOTERM_BP_ALL         | GO:0001654~eye development                                                  |
| GOTERM_BP_ALL         | GO:0043010~camera-type eye development                                      |
| GOTERM_BP_ALL         | GO:0090596~sensory organ morphogenesis                                      |
| GOTERM_BP_ALL         | GO:0043583~ear development                                                  |
| GOTERM_BP_ALL         | GO:0048839~inner ear development                                            |
| GOTERM_BP_ALL         | GO:0048592~eye morphogenesis                                                |
| GOTERM_BP_ALL         | GO:0090102~cochlea development                                              |
| GOTERM_BP_ALL         | GO:0042471~ear morphogenesis                                                |
| GOTERM_BP_ALL         | GO:0042472~inner ear morphogenesis                                          |
|                       |                                                                             |
| Annotation Cluster 36 | Enrichment Score: 4.35202300009815                                          |
| Category              | Term                                                                        |
| GOTERM_BP_ALL         | GO:0060425~lung morphogenesis                                               |
| GOTERM_BP_ALL         | GO:0060541~respiratory system development                                   |
| GOTERM_BP_ALL         | GO:0030324~lung development                                                 |
| GOTERM_BP_ALL         | GO:0030323~respiratory tube development                                     |
| GOTERM_BP_ALL         | GO:0060428~lung epithelium development                                      |
| GOTERM_BP_ALL         | GO:0060441~epithelial tube branching involved in lung morphogenesis         |
| GOTERM_BP_ALL         | GO:0060479~lung cell differentiation                                        |
| GOTERM_BP_ALL         | GO:0060487~lung epithelial cell differentiation                             |
|                       |                                                                             |
| Annotation Cluster 37 | Enrichment Score: 4.229605644271566                                         |
| Category              | Term                                                                        |
| GOTERM_BP_ALL         | GO:0048663~neuron fate commitment                                           |
| GOTERM_BP_ALL         | GO:0021879~forebrain neuron differentiation                                 |
| GOTERM_BP_ALL         | GO:0021877~forebrain neuron fate commitment                                 |
| GOTERM_BP_ALL         | GO:0021872~forebrain generation of neurons                                  |
| GOTERM_BP_ALL         | GO:0021902~commitment of neuronal cell to specific neuron type in forebrain |
| GOTERM_BP_ALL         | GO:0097154~GABAergic neuron differentiation                                 |
|                       |                                                                             |
| Annotation Cluster 38 | Enrichment Score: 4.1964777759385345                                        |

| Category      | Term                                                                 |
|---------------|----------------------------------------------------------------------|
| GOTERM_BP_ALL | GO:0000278~mitotic cell cycle                                        |
| GOTERM_BP_ALL | GO:0007346~regulation of mitotic cell cycle                          |
| GOTERM_BP_ALL | GO:0007049~cell cycle                                                |
| GOTERM_BP_ALL | GO:0051726~regulation of cell cycle                                  |
| GOTERM_BP_ALL | GO:0010564~regulation of cell cycle process                          |
| GOTERM_BP_ALL | GO:1903047~mitotic cell cycle process                                |
| GOTERM_BP_ALL | GO:0022402~cell cycle process                                        |
| GOTERM_BP_ALL | GO:0007067~mitotic nuclear division                                  |
| GOTERM_BP_ALL | GO:0051983~regulation of chromosome segregation                      |
| GOTERM_BP_ALL | GO:0051052~regulation of DNA metabolic process                       |
| GOTERM_BP_ALL | GO:0007059~chromosome segregation                                    |
| GOTERM_BP_ALL | GO:0044770~cell cycle phase transition                               |
| GOTERM_BP_ALL | GO:0048285~organelle fission                                         |
| GOTERM_BP_ALL | GO:0044843~cell cycle G1/S phase transition                          |
| GOTERM_BP_ALL | GO:0000819~sister chromatid segregation                              |
| GOTERM_BP_ALL | GO:0033045~regulation of sister chromatid segregation                |
| GOTERM_BP_ALL | GO:0044772~mitotic cell cycle phase transition                       |
| GOTERM_BP_ALL | GO:1902806~regulation of cell cycle G1/S phase transition            |
| GOTERM_BP_ALL | GO:0007088~regulation of mitotic nuclear division                    |
| GOTERM_BP_ALL | GO:0000280~nuclear division                                          |
| GOTERM_BP_ALL | GO:1901987~regulation of cell cycle phase transition                 |
| GOTERM_BP_ALL | GO:0033554~cellular response to stress                               |
| GOTERM_BP_ALL | GO:0080135~regulation of cellular response to stress                 |
| GOTERM_BP_ALL | GO:0007062~sister chromatid cohesion                                 |
| GOTERM_BP_ALL | GO:0006950~response to stress                                        |
| GOTERM_BP_ALL | GO:0000070~mitotic sister chromatid segregation                      |
| GOTERM_BP_ALL | GO:0051783~regulation of nuclear division                            |
| GOTERM_BP_ALL | GO:0080134~regulation of response to stress                          |
| GOTERM_BP_ALL | GO:2001020~regulation of response to DNA damage stimulus             |
| GOTERM_BP_ALL | GO:0098813~nuclear chromosome segregation                            |
| GOTERM_BP_ALL | GO:2000045~regulation of G1/S transition of mitotic cell cycle       |
| GOTERM_BP_ALL | GO:1901990~regulation of mitotic cell cycle phase transition         |
| GOTERM_BP_ALL | GO:0033047~regulation of mitotic sister chromatid segregation        |
| GOTERM_BP_ALL | GO:0007064~mitotic sister chromatid cohesion                         |
| GOTERM_BP_ALL | GO:0045739~positive regulation of DNA repair                         |
| GOTERM_BP_ALL | GO:0045445~myoblast differentiation                                  |
| GOTERM_BP_ALL | GO:1905818~regulation of chromosome separation                       |
| GOTERM_BP_ALL | GO:0045663~positive regulation of myoblast differentiation           |
| GOTERM_BP_ALL | GO:0006974~cellular response to DNA damage stimulus                  |
| GOTERM_BP_ALL | GO:0051054~positive regulation of DNA metabolic process              |
| GOTERM_BP_ALL | GO:0006282~regulation of DNA repair                                  |
| GOTERM_BP_ALL | GO:2001022~positive regulation of response to DNA damage stimulus    |
| GOTERM_BP_ALL | GO:2000781~positive regulation of double-strand break repair         |
| GOTERM_BP_ALL | GO:0030071~regulation of mitotic metaphase/anaphase transition       |
| GOTERM_BP_ALL | GO:1902099~regulation of metaphase/anaphase transition of cell cycle |
| GOTERM_BP_ALL | GO:2000779~regulation of double-strand break repair                  |
| GOTERM_BP_ALL | GO:2000819~regulation of nucleotide-excision repair                  |
| GOTERM_BP_ALL | GO:0010965~regulation of mitotic sister chromatid separation         |
| GOTERM_BP_ALL | GO:0044784~metaphase/anaphase transition of cell cycle               |
| GOTERM_BP_ALL | GO:0006302~double-strand break repair                                |

|                       |                                                                             |
|-----------------------|-----------------------------------------------------------------------------|
| GOTERM_BP_ALL         | GO:0051306~mitotic sister chromatid separation                              |
| GOTERM_BP_ALL         | GO:2000036~regulation of stem cell population maintenance                   |
| GOTERM_BP_ALL         | GO:0070316~regulation of G0 to G1 transition                                |
| GOTERM_BP_ALL         | GO:0045661~regulation of myoblast differentiation                           |
| GOTERM_BP_ALL         | GO:0006281~DNA repair                                                       |
| GOTERM_BP_ALL         | GO:0051304~chromosome separation                                            |
| GOTERM_BP_ALL         | GO:1902459~positive regulation of stem cell population maintenance          |
| GOTERM_BP_ALL         | GO:0000018~regulation of DNA recombination                                  |
| GOTERM_BP_ALL         | GO:0045911~positive regulation of DNA recombination                         |
| GOTERM_BP_ALL         | GO:0006310~DNA recombination                                                |
|                       |                                                                             |
| Annotation Cluster 39 | Enrichment Score: 4.179754312873051                                         |
| Category              | Term                                                                        |
| GOTERM_BP_ALL         | GO:0019827~stem cell population maintenance                                 |
| GOTERM_BP_ALL         | GO:0098727~maintenance of cell number                                       |
| GOTERM_BP_ALL         | GO:0001708~cell fate specification                                          |
| GOTERM_BP_ALL         | GO:0035019~somatic stem cell population maintenance                         |
| GOTERM_BP_ALL         | GO:0060795~cell fate commitment involved in formation of primary germ layer |
|                       |                                                                             |
| Annotation Cluster 40 | Enrichment Score: 4.069078367512534                                         |
| Category              | Term                                                                        |
| GOTERM_BP_ALL         | GO:0016569~covalent chromatin modification                                  |
| GOTERM_BP_ALL         | GO:0016570~histone modification                                             |
| GOTERM_BP_ALL         | GO:1902275~regulation of chromatin organization                             |
| GOTERM_BP_ALL         | GO:0018205~peptidyl-lysine modification                                     |
| GOTERM_BP_ALL         | GO:0018394~peptidyl-lysine acetylation                                      |
| GOTERM_BP_ALL         | GO:0031056~regulation of histone modification                               |
| GOTERM_BP_ALL         | GO:0016571~histone methylation                                              |
| GOTERM_BP_ALL         | GO:0034968~histone lysine methylation                                       |
| GOTERM_BP_ALL         | GO:0008213~protein alkylation                                               |
| GOTERM_BP_ALL         | GO:0006479~protein methylation                                              |
| GOTERM_BP_ALL         | GO:0018022~peptidyl-lysine methylation                                      |
| GOTERM_BP_ALL         | GO:2001252~positive regulation of chromosome organization                   |
| GOTERM_BP_ALL         | GO:0018027~peptidyl-lysine dimethylation                                    |
| GOTERM_BP_ALL         | GO:0031060~regulation of histone methylation                                |
| GOTERM_BP_ALL         | GO:0018023~peptidyl-lysine trimethylation                                   |
| GOTERM_BP_ALL         | GO:0043414~macromolecule methylation                                        |
| GOTERM_BP_ALL         | GO:0031058~positive regulation of histone modification                      |
| GOTERM_BP_ALL         | GO:1905269~positive regulation of chromatin organization                    |
| GOTERM_BP_ALL         | GO:0032259~methylation                                                      |
| GOTERM_BP_ALL         | GO:0051570~regulation of histone H3-K9 methylation                          |
| GOTERM_BP_ALL         | GO:2000615~regulation of histone H3-K9 acetylation                          |
| GOTERM_BP_ALL         | GO:1900112~regulation of histone H3-K9 trimethylation                       |
| GOTERM_BP_ALL         | GO:0061647~histone H3-K9 modification                                       |
| GOTERM_BP_ALL         | GO:0036124~histone H3-K9 trimethylation                                     |
| GOTERM_BP_ALL         | GO:0031062~positive regulation of histone methylation                       |
| GOTERM_BP_ALL         | GO:0051568~histone H3-K4 methylation                                        |
| GOTERM_BP_ALL         | GO:0051567~histone H3-K9 methylation                                        |
| GOTERM_BP_ALL         | GO:0051569~regulation of histone H3-K4 methylation                          |
|                       |                                                                             |

|                       |                                                                                   |
|-----------------------|-----------------------------------------------------------------------------------|
| Annotation Cluster 41 | Enrichment Score: 3.9173162131481574                                              |
| Category              | Term                                                                              |
| GOTERM_BP_ALL         | GO:0001894~tissue homeostasis                                                     |
| GOTERM_BP_ALL         | GO:0060249~anatomical structure homeostasis                                       |
| GOTERM_BP_ALL         | GO:0048873~homeostasis of number of cells within a tissue                         |
| GOTERM_BP_ALL         | GO:0048871~multicellular organismal homeostasis                                   |
|                       |                                                                                   |
| Annotation Cluster 42 | Enrichment Score: 3.877708844224279                                               |
| Category              | Term                                                                              |
| GOTERM_BP_ALL         | GO:0042063~gliogenesis                                                            |
| GOTERM_BP_ALL         | GO:0010001~glial cell differentiation                                             |
| GOTERM_BP_ALL         | GO:0014013~regulation of gliogenesis                                              |
| GOTERM_BP_ALL         | GO:0048709~oligodendrocyte differentiation                                        |
| GOTERM_BP_ALL         | GO:0021782~glial cell development                                                 |
| GOTERM_BP_ALL         | GO:0014003~oligodendrocyte development                                            |
| GOTERM_BP_ALL         | GO:0042552~myelination                                                            |
| GOTERM_BP_ALL         | GO:0007272~ensheathment of neurons                                                |
| GOTERM_BP_ALL         | GO:0008366~axon ensheathment                                                      |
| GOTERM_BP_ALL         | GO:0032291~axon ensheathment in central nervous system                            |
| GOTERM_BP_ALL         | GO:0022010~central nervous system myelination                                     |
| GOTERM_BP_ALL         | GO:0007422~peripheral nervous system development                                  |
|                       |                                                                                   |
| Annotation Cluster 43 | Enrichment Score: 3.7805724567534624                                              |
| Category              | Term                                                                              |
| GOTERM_BP_ALL         | GO:0010721~negative regulation of cell development                                |
| GOTERM_BP_ALL         | GO:0050768~negative regulation of neurogenesis                                    |
| GOTERM_BP_ALL         | GO:0051961~negative regulation of nervous system development                      |
| GOTERM_BP_ALL         | GO:0072091~regulation of stem cell proliferation                                  |
| GOTERM_BP_ALL         | GO:0072089~stem cell proliferation                                                |
| GOTERM_BP_ALL         | GO:0061351~neural precursor cell proliferation                                    |
| GOTERM_BP_ALL         | GO:0014013~regulation of gliogenesis                                              |
| GOTERM_BP_ALL         | GO:0007405~neuroblast proliferation                                               |
| GOTERM_BP_ALL         | GO:1902692~regulation of neuroblast proliferation                                 |
| GOTERM_BP_ALL         | GO:0014014~negative regulation of gliogenesis                                     |
| GOTERM_BP_ALL         | GO:0045665~negative regulation of neuron differentiation                          |
| GOTERM_BP_ALL         | GO:0048546~digestive tract morphogenesis                                          |
| GOTERM_BP_ALL         | GO:2000648~positive regulation of stem cell proliferation                         |
| GOTERM_BP_ALL         | GO:2000177~regulation of neural precursor cell proliferation                      |
| GOTERM_BP_ALL         | GO:0031345~negative regulation of cell projection organization                    |
| GOTERM_BP_ALL         | GO:0010977~negative regulation of neuron projection development                   |
| GOTERM_BP_ALL         | GO:2000647~negative regulation of stem cell proliferation                         |
| GOTERM_BP_ALL         | GO:0002052~positive regulation of neuroblast proliferation                        |
| GOTERM_BP_ALL         | GO:0007406~negative regulation of neuroblast proliferation                        |
| GOTERM_BP_ALL         | GO:2000178~negative regulation of neural precursor cell proliferation             |
| GOTERM_BP_ALL         | GO:2000179~positive regulation of neural precursor cell proliferation             |
| GOTERM_BP_ALL         | GO:0006354~DNA-templated transcription, elongation                                |
| GOTERM_BP_ALL         | GO:0034243~regulation of transcription elongation from RNA polymerase II promoter |
| GOTERM_BP_ALL         | GO:0006368~transcription elongation from RNA polymerase II promoter               |
| GOTERM_BP_ALL         | GO:0032784~regulation of DNA-templated transcription, elongation                  |
| GOTERM_BP_ALL         | GO:0030178~negative regulation of Wnt signaling pathway                           |

|                       |                                                                   |
|-----------------------|-------------------------------------------------------------------|
| GOTERM_BP_ALL         | GO:0090090~negative regulation of canonical Wnt signaling pathway |
|                       |                                                                   |
| Annotation Cluster 44 | Enrichment Score: 3.689270009164847                               |
| Category              | Term                                                              |
| GOTERM_BP_ALL         | GO:0030534~adult behavior                                         |
| GOTERM_BP_ALL         | GO:0050905~neuromuscular process                                  |
| GOTERM_BP_ALL         | GO:0007626~locomotory behavior                                    |
| GOTERM_BP_ALL         | GO:0008344~adult locomotory behavior                              |
|                       |                                                                   |
| Annotation Cluster 45 | Enrichment Score: 3.6094506207871873                              |
| Category              | Term                                                              |
| GOTERM_BP_ALL         | GO:0006333~chromatin assembly or disassembly                      |
| GOTERM_BP_ALL         | GO:0031497~chromatin assembly                                     |
| GOTERM_BP_ALL         | GO:0071103~DNA conformation change                                |
| GOTERM_BP_ALL         | GO:0006323~DNA packaging                                          |
| GOTERM_BP_ALL         | GO:0071824~protein-DNA complex subunit organization               |
| GOTERM_BP_ALL         | GO:0065004~protein-DNA complex assembly                           |
| GOTERM_BP_ALL         | GO:0034728~nucleosome organization                                |
| GOTERM_BP_ALL         | GO:0031507~heterochromatin assembly                               |
| GOTERM_BP_ALL         | GO:0006336~DNA replication-independent nucleosome assembly        |
| GOTERM_BP_ALL         | GO:0070828~heterochromatin organization                           |
| GOTERM_BP_ALL         | GO:0034724~DNA replication-independent nucleosome organization    |
| GOTERM_BP_ALL         | GO:0045652~regulation of megakaryocyte differentiation            |
| GOTERM_BP_ALL         | GO:0006334~nucleosome assembly                                    |
| GOTERM_BP_ALL         | GO:0071168~protein localization to chromatin                      |
| GOTERM_BP_ALL         | GO:0032200~telomere organization                                  |
| GOTERM_BP_ALL         | GO:0071459~protein localization to chromosome, centromeric region |
| GOTERM_BP_ALL         | GO:0061644~protein localization to CENP-A containing chromatin    |
| GOTERM_BP_ALL         | GO:0045653~negative regulation of megakaryocyte differentiation   |
| GOTERM_BP_ALL         | GO:0030219~megakaryocyte differentiation                          |
| GOTERM_BP_ALL         | GO:0034502~protein localization to chromosome                     |
| GOTERM_BP_ALL         | GO:0034723~DNA replication-dependent nucleosome organization      |
| GOTERM_BP_ALL         | GO:0006335~DNA replication-dependent nucleosome assembly          |
|                       |                                                                   |
| Annotation Cluster 46 | Enrichment Score: 3.507952642664953                               |
| Category              | Term                                                              |
| GOTERM_BP_ALL         | GO:0021537~telencephalon development                              |
| GOTERM_BP_ALL         | GO:0021987~cerebral cortex development                            |
| GOTERM_BP_ALL         | GO:0021543~pallium development                                    |
| GOTERM_BP_ALL         | GO:0021795~cerebral cortex cell migration                         |
| GOTERM_BP_ALL         | GO:0008347~glial cell migration                                   |
| GOTERM_BP_ALL         | GO:0022029~telencephalon cell migration                           |
| GOTERM_BP_ALL         | GO:0021799~cerebral cortex radially oriented cell migration       |
| GOTERM_BP_ALL         | GO:0021885~forebrain cell migration                               |
| GOTERM_BP_ALL         | GO:0021801~cerebral cortex radial glia guided migration           |
| GOTERM_BP_ALL         | GO:0022030~telencephalon glial cell migration                     |
|                       |                                                                   |
| Annotation Cluster 47 | Enrichment Score: 3.313120820314416                               |
| Category              | Term                                                              |
| GOTERM_BP_ALL         | GO:0010942~positive regulation of cell death                      |
| GOTERM_BP_ALL         | GO:0043065~positive regulation of apoptotic process               |



|                       |                                                                     |
|-----------------------|---------------------------------------------------------------------|
| GOTERM_BP_ALL         | GO:0043068~positive regulation of programmed cell death             |
| GOTERM_BP_ALL         | GO:2001235~positive regulation of apoptotic signaling pathway       |
|                       |                                                                     |
| Annotation Cluster 48 | Enrichment Score: 3.3067139656130924                                |
| Category              | Term                                                                |
| GOTERM_BP_ALL         | GO:1903706~regulation of hemopoiesis                                |
| GOTERM_BP_ALL         | GO:0030097~hemopoiesis                                              |
| GOTERM_BP_ALL         | GO:0002520~immune system development                                |
| GOTERM_BP_ALL         | GO:0048534~hematopoietic or lymphoid organ development              |
| GOTERM_BP_ALL         | GO:0002521~leukocyte differentiation                                |
| GOTERM_BP_ALL         | GO:0045637~regulation of myeloid cell differentiation               |
| GOTERM_BP_ALL         | GO:0002682~regulation of immune system process                      |
| GOTERM_BP_ALL         | GO:1902105~regulation of leukocyte differentiation                  |
| GOTERM_BP_ALL         | GO:1903707~negative regulation of hemopoiesis                       |
| GOTERM_BP_ALL         | GO:0030099~myeloid cell differentiation                             |
| GOTERM_BP_ALL         | GO:0045638~negative regulation of myeloid cell differentiation      |
| GOTERM_BP_ALL         | GO:0045321~leukocyte activation                                     |
| GOTERM_BP_ALL         | GO:0001775~cell activation                                          |
| GOTERM_BP_ALL         | GO:0002573~myeloid leukocyte differentiation                        |
| GOTERM_BP_ALL         | GO:0002376~immune system process                                    |
| GOTERM_BP_ALL         | GO:0002761~regulation of myeloid leukocyte differentiation          |
| GOTERM_BP_ALL         | GO:0046649~lymphocyte activation                                    |
| GOTERM_BP_ALL         | GO:0030316~osteoclast differentiation                               |
| GOTERM_BP_ALL         | GO:0030155~regulation of cell adhesion                              |
| GOTERM_BP_ALL         | GO:0002683~negative regulation of immune system process             |
| GOTERM_BP_ALL         | GO:0030217~T cell differentiation                                   |
| GOTERM_BP_ALL         | GO:0030098~lymphocyte differentiation                               |
| GOTERM_BP_ALL         | GO:0002694~regulation of leukocyte activation                       |
| GOTERM_BP_ALL         | GO:0042110~T cell activation                                        |
| GOTERM_BP_ALL         | GO:1903708~positive regulation of hemopoiesis                       |
| GOTERM_BP_ALL         | GO:1902107~positive regulation of leukocyte differentiation         |
| GOTERM_BP_ALL         | GO:0051147~regulation of muscle cell differentiation                |
| GOTERM_BP_ALL         | GO:0002696~positive regulation of leukocyte activation              |
| GOTERM_BP_ALL         | GO:0045445~myoblast differentiation                                 |
| GOTERM_BP_ALL         | GO:0045670~regulation of osteoclast differentiation                 |
| GOTERM_BP_ALL         | GO:1902106~negative regulation of leukocyte differentiation         |
| GOTERM_BP_ALL         | GO:0050865~regulation of cell activation                            |
| GOTERM_BP_ALL         | GO:0045785~positive regulation of cell adhesion                     |
| GOTERM_BP_ALL         | GO:0045663~positive regulation of myoblast differentiation          |
| GOTERM_BP_ALL         | GO:0050867~positive regulation of cell activation                   |
| GOTERM_BP_ALL         | GO:0098602~single organism cell adhesion                            |
| GOTERM_BP_ALL         | GO:0051249~regulation of lymphocyte activation                      |
| GOTERM_BP_ALL         | GO:0002762~negative regulation of myeloid leukocyte differentiation |
| GOTERM_BP_ALL         | GO:0002684~positive regulation of immune system process             |
| GOTERM_BP_ALL         | GO:1901985~positive regulation of protein acetylation               |
| GOTERM_BP_ALL         | GO:2000819~regulation of nucleotide-excision repair                 |
| GOTERM_BP_ALL         | GO:0043525~positive regulation of neuron apoptotic process          |
| GOTERM_BP_ALL         | GO:0051251~positive regulation of lymphocyte activation             |
| GOTERM_BP_ALL         | GO:1901216~positive regulation of neuron death                      |
| GOTERM_BP_ALL         | GO:0050870~positive regulation of T cell activation                 |
| GOTERM_BP_ALL         | GO:0045671~negative regulation of osteoclast differentiation        |

|                       |                                                                       |
|-----------------------|-----------------------------------------------------------------------|
| GOTERM_BP_ALL         | GO:0050863~regulation of T cell activation                            |
| GOTERM_BP_ALL         | GO:0022409~positive regulation of cell-cell adhesion                  |
| GOTERM_BP_ALL         | GO:1903039~positive regulation of leukocyte cell-cell adhesion        |
| GOTERM_BP_ALL         | GO:0045582~positive regulation of T cell differentiation              |
| GOTERM_BP_ALL         | GO:0016337~single organismal cell-cell adhesion                       |
| GOTERM_BP_ALL         | GO:0070316~regulation of G0 to G1 transition                          |
| GOTERM_BP_ALL         | GO:0045661~regulation of myoblast differentiation                     |
| GOTERM_BP_ALL         | GO:0007155~cell adhesion                                              |
| GOTERM_BP_ALL         | GO:1903037~regulation of leukocyte cell-cell adhesion                 |
| GOTERM_BP_ALL         | GO:0022610~biological adhesion                                        |
| GOTERM_BP_ALL         | GO:0051149~positive regulation of muscle cell differentiation         |
| GOTERM_BP_ALL         | GO:0045580~regulation of T cell differentiation                       |
| GOTERM_BP_ALL         | GO:0045621~positive regulation of lymphocyte differentiation          |
| GOTERM_BP_ALL         | GO:0048771~tissue remodeling                                          |
| GOTERM_BP_ALL         | GO:0022407~regulation of cell-cell adhesion                           |
| GOTERM_BP_ALL         | GO:0007159~leukocyte cell-cell adhesion                               |
| GOTERM_BP_ALL         | GO:0045619~regulation of lymphocyte differentiation                   |
| GOTERM_BP_ALL         | GO:0002320~lymphoid progenitor cell differentiation                   |
| GOTERM_BP_ALL         | GO:0098609~cell-cell adhesion                                         |
| GOTERM_BP_ALL         | GO:2000758~positive regulation of peptidyl-lysine acetylation         |
| GOTERM_BP_ALL         | GO:0046849~bone remodeling                                            |
| GOTERM_BP_ALL         | GO:0007219~Notch signaling pathway                                    |
| GOTERM_BP_ALL         | GO:0045765~regulation of angiogenesis                                 |
| GOTERM_BP_ALL         | GO:1901342~regulation of vasculature development                      |
| GOTERM_BP_ALL         | GO:0016525~negative regulation of angiogenesis                        |
| GOTERM_BP_ALL         | GO:2000181~negative regulation of blood vessel morphogenesis          |
| GOTERM_BP_ALL         | GO:1901343~negative regulation of vasculature development             |
|                       |                                                                       |
| Annotation Cluster 49 | Enrichment Score: 3.1848147575471826                                  |
| Category              | Term                                                                  |
| GOTERM_BP_ALL         | GO:0048854~brain morphogenesis                                        |
| GOTERM_BP_ALL         | GO:0021761~limbic system development                                  |
| GOTERM_BP_ALL         | GO:0048853~forebrain morphogenesis                                    |
|                       |                                                                       |
| Annotation Cluster 50 | Enrichment Score: 3.1778615290350793                                  |
| Category              | Term                                                                  |
| GOTERM_BP_ALL         | GO:0007346~regulation of mitotic cell cycle                           |
| GOTERM_BP_ALL         | GO:0045787~positive regulation of cell cycle                          |
| GOTERM_BP_ALL         | GO:0045931~positive regulation of mitotic cell cycle                  |
| GOTERM_BP_ALL         | GO:0090068~positive regulation of cell cycle process                  |
| GOTERM_BP_ALL         | GO:0045840~positive regulation of mitotic nuclear division            |
| GOTERM_BP_ALL         | GO:0051785~positive regulation of nuclear division                    |
| GOTERM_BP_ALL         | GO:1901992~positive regulation of mitotic cell cycle phase transition |
| GOTERM_BP_ALL         | GO:1901989~positive regulation of cell cycle phase transition         |
| GOTERM_BP_ALL         | GO:0051984~positive regulation of chromosome segregation              |
|                       |                                                                       |
| Annotation Cluster 51 | Enrichment Score: 3.0619237890716957                                  |
| Category              | Term                                                                  |
| GOTERM_BP_ALL         | GO:0001655~urogenital system development                              |
| GOTERM_BP_ALL         | GO:0072001~renal system development                                   |
| GOTERM_BP_ALL         | GO:0001709~cell fate determination                                    |

|               |                                                                                         |
|---------------|-----------------------------------------------------------------------------------------|
| GOTERM_BP_ALL | GO:0061326~renal tubule development                                                     |
| GOTERM_BP_ALL | GO:0061333~renal tubule morphogenesis                                                   |
| GOTERM_BP_ALL | GO:0090185~negative regulation of kidney development                                    |
| GOTERM_BP_ALL | GO:0001656~metanephros development                                                      |
| GOTERM_BP_ALL | GO:0001708~cell fate specification                                                      |
| GOTERM_BP_ALL | GO:0060993~kidney morphogenesis                                                         |
| GOTERM_BP_ALL | GO:0072080~nephron tubule development                                                   |
| GOTERM_BP_ALL | GO:0001822~kidney development                                                           |
| GOTERM_BP_ALL | GO:0061138~morphogenesis of a branching epithelium                                      |
| GOTERM_BP_ALL | GO:1905330~regulation of morphogenesis of an epithelium                                 |
| GOTERM_BP_ALL | GO:0048754~branching morphogenesis of an epithelial tube                                |
| GOTERM_BP_ALL | GO:0072006~nephron development                                                          |
| GOTERM_BP_ALL | GO:0001763~morphogenesis of a branching structure                                       |
| GOTERM_BP_ALL | GO:0072009~nephron epithelium development                                               |
| GOTERM_BP_ALL | GO:0061005~cell differentiation involved in kidney development                          |
| GOTERM_BP_ALL | GO:0090183~regulation of kidney development                                             |
| GOTERM_BP_ALL | GO:2000027~regulation of organ morphogenesis                                            |
| GOTERM_BP_ALL | GO:0060675~ureteric bud morphogenesis                                                   |
| GOTERM_BP_ALL | GO:0072171~mesonephric tubule morphogenesis                                             |
| GOTERM_BP_ALL | GO:0072073~kidney epithelium development                                                |
| GOTERM_BP_ALL | GO:0072189~ureter development                                                           |
| GOTERM_BP_ALL | GO:0072078~nephron tubule morphogenesis                                                 |
| GOTERM_BP_ALL | GO:0072079~nephron tubule formation                                                     |
| GOTERM_BP_ALL | GO:0072179~nephric duct formation                                                       |
| GOTERM_BP_ALL | GO:0072088~nephron epithelium morphogenesis                                             |
| GOTERM_BP_ALL | GO:0072028~nephron morphogenesis                                                        |
| GOTERM_BP_ALL | GO:0040019~positive regulation of embryonic development                                 |
| GOTERM_BP_ALL | GO:0010092~specification of animal organ identity                                       |
| GOTERM_BP_ALL | GO:0072217~negative regulation of metanephros development                               |
| GOTERM_BP_ALL | GO:0001657~ureteric bud development                                                     |
| GOTERM_BP_ALL | GO:0072163~mesonephric epithelium development                                           |
| GOTERM_BP_ALL | GO:0072164~mesonephric tubule development                                               |
| GOTERM_BP_ALL | GO:0001658~branching involved in ureteric bud morphogenesis                             |
| GOTERM_BP_ALL | GO:0001823~mesonephros development                                                      |
| GOTERM_BP_ALL | GO:0060795~cell fate commitment involved in formation of primary germ layer             |
| GOTERM_BP_ALL | GO:2001054~negative regulation of mesenchymal cell apoptotic process                    |
| GOTERM_BP_ALL | GO:0048645~animal organ formation                                                       |
| GOTERM_BP_ALL | GO:0072178~nephric duct morphogenesis                                                   |
| GOTERM_BP_ALL | GO:2001053~regulation of mesenchymal cell apoptotic process                             |
| GOTERM_BP_ALL | GO:0072182~regulation of nephron tubule epithelial cell differentiation                 |
| GOTERM_BP_ALL | GO:0001704~formation of primary germ layer                                              |
| GOTERM_BP_ALL | GO:0090184~positive regulation of kidney development                                    |
| GOTERM_BP_ALL | GO:0097152~mesenchymal cell apoptotic process                                           |
| GOTERM_BP_ALL | GO:0072176~nephric duct development                                                     |
| GOTERM_BP_ALL | GO:0035850~epithelial cell differentiation involved in kidney development               |
| GOTERM_BP_ALL | GO:0048806~genitalia development                                                        |
| GOTERM_BP_ALL | GO:0048538~thymus development                                                           |
| GOTERM_BP_ALL | GO:2000696~regulation of epithelial cell differentiation involved in kidney development |
| GOTERM_BP_ALL | GO:0060688~regulation of morphogenesis of a branching structure                         |

|                       |                                                                               |
|-----------------------|-------------------------------------------------------------------------------|
| GOTERM_BP_ALL         | GO:0060231~mesenchymal to epithelial transition                               |
| GOTERM_BP_ALL         | GO:0072202~cell differentiation involved in metanephros development           |
| GOTERM_BP_ALL         | GO:0072215~regulation of metanephros development                              |
| GOTERM_BP_ALL         | GO:0061217~regulation of mesonephros development                              |
| GOTERM_BP_ALL         | GO:0071695~anatomical structure maturation                                    |
| GOTERM_BP_ALL         | GO:0033077~T cell differentiation in thymus                                   |
| GOTERM_BP_ALL         | GO:1905332~positive regulation of morphogenesis of an epithelium              |
| GOTERM_BP_ALL         | GO:0030856~regulation of epithelial cell differentiation                      |
|                       |                                                                               |
| Annotation Cluster 52 | Enrichment Score: 3.0361374109240766                                          |
| Category              | Term                                                                          |
| GOTERM_BP_ALL         | GO:0048485~sympathetic nervous system development                             |
| GOTERM_BP_ALL         | GO:0048483~autonomic nervous system development                               |
| GOTERM_BP_ALL         | GO:0002088~lens development in camera-type eye                                |
|                       |                                                                               |
| Annotation Cluster 53 | Enrichment Score: 3.006439976242694                                           |
| Category              | Term                                                                          |
| GOTERM_BP_ALL         | GO:0060425~lung morphogenesis                                                 |
| GOTERM_BP_ALL         | GO:0060428~lung epithelium development                                        |
| GOTERM_BP_ALL         | GO:0035272~exocrine system development                                        |
| GOTERM_BP_ALL         | GO:0022612~gland morphogenesis                                                |
| GOTERM_BP_ALL         | GO:0007435~salivary gland morphogenesis                                       |
| GOTERM_BP_ALL         | GO:0007431~salivary gland development                                         |
|                       |                                                                               |
| Annotation Cluster 54 | Enrichment Score: 2.995370063455802                                           |
| Category              | Term                                                                          |
| GOTERM_BP_ALL         | GO:0051101~regulation of DNA binding                                          |
| GOTERM_BP_ALL         | GO:0051098~regulation of binding                                              |
| GOTERM_BP_ALL         | GO:2000677~regulation of transcription regulatory region DNA binding          |
| GOTERM_BP_ALL         | GO:2000679~positive regulation of transcription regulatory region DNA binding |
| GOTERM_BP_ALL         | GO:0003179~heart valve morphogenesis                                          |
| GOTERM_BP_ALL         | GO:0043388~positive regulation of DNA binding                                 |
| GOTERM_BP_ALL         | GO:0003170~heart valve development                                            |
| GOTERM_BP_ALL         | GO:0051099~positive regulation of binding                                     |
| GOTERM_BP_ALL         | GO:0003180~aortic valve morphogenesis                                         |
| GOTERM_BP_ALL         | GO:0003176~aortic valve development                                           |
| GOTERM_BP_ALL         | GO:1905314~semi-lunar valve development                                       |
|                       |                                                                               |
| Annotation Cluster 55 | Enrichment Score: 2.9873967114175177                                          |
| Category              | Term                                                                          |
| GOTERM_BP_ALL         | GO:0030316~osteoclast differentiation                                         |
| GOTERM_BP_ALL         | GO:0060348~bone development                                                   |
| GOTERM_BP_ALL         | GO:0036035~osteoclast development                                             |
| GOTERM_BP_ALL         | GO:0098751~bone cell development                                              |
| GOTERM_BP_ALL         | GO:0061515~myeloid cell development                                           |
|                       |                                                                               |
| Annotation Cluster 56 | Enrichment Score: 2.9498671760362027                                          |
| Category              | Term                                                                          |
| GOTERM_BP_ALL         | GO:0050808~synapse organization                                               |
| GOTERM_BP_ALL         | GO:0050803~regulation of synapse structure or activity                        |

|                       |                                                                        |
|-----------------------|------------------------------------------------------------------------|
| GOTERM_BP_ALL         | GO:0050807~regulation of synapse organization                          |
| GOTERM_BP_ALL         | GO:0051963~regulation of synapse assembly                              |
|                       |                                                                        |
| Annotation Cluster 57 | Enrichment Score: 2.877781764812515                                    |
| Category              | Term                                                                   |
| GOTERM_BP_ALL         | GO:0060425~lung morphogenesis                                          |
| GOTERM_BP_ALL         | GO:0031016~pancreas development                                        |
| GOTERM_BP_ALL         | GO:0060428~lung epithelium development                                 |
| GOTERM_BP_ALL         | GO:0048546~digestive tract morphogenesis                               |
| GOTERM_BP_ALL         | GO:0060441~epithelial tube branching involved in lung morphogenesis    |
| GOTERM_BP_ALL         | GO:0010464~regulation of mesenchymal cell proliferation                |
| GOTERM_BP_ALL         | GO:0010463~mesenchymal cell proliferation                              |
| GOTERM_BP_ALL         | GO:0060916~mesenchymal cell proliferation involved in lung development |
| GOTERM_BP_ALL         | GO:0048617~embryonic foregut morphogenesis                             |
| GOTERM_BP_ALL         | GO:0007440~foregut morphogenesis                                       |
| GOTERM_BP_ALL         | GO:0051145~smooth muscle cell differentiation                          |
| GOTERM_BP_ALL         | GO:0060438~trachea development                                         |
| GOTERM_BP_ALL         | GO:0002053~positive regulation of mesenchymal cell proliferation       |
| GOTERM_BP_ALL         | GO:0001570~vasculogenesis                                              |
| GOTERM_BP_ALL         | GO:0009855~determination of bilateral symmetry                         |
| GOTERM_BP_ALL         | GO:0009799~specification of symmetry                                   |
| GOTERM_BP_ALL         | GO:0007368~determination of left/right symmetry                        |
|                       |                                                                        |
| Annotation Cluster 58 | Enrichment Score: 2.8386997977824553                                   |
| Category              | Term                                                                   |
| GOTERM_BP_ALL         | GO:0060627~regulation of vesicle-mediated transport                    |
| GOTERM_BP_ALL         | GO:0006897~endocytosis                                                 |
| GOTERM_BP_ALL         | GO:0030100~regulation of endocytosis                                   |
|                       |                                                                        |
| Annotation Cluster 59 | Enrichment Score: 2.7731720947521685                                   |
| Category              | Term                                                                   |
| GOTERM_BP_ALL         | GO:0048762~mesenchymal cell differentiation                            |
| GOTERM_BP_ALL         | GO:0048863~stem cell differentiation                                   |
| GOTERM_BP_ALL         | GO:0035272~exocrine system development                                 |
| GOTERM_BP_ALL         | GO:0014033~neural crest cell differentiation                           |
| GOTERM_BP_ALL         | GO:0003151~outflow tract morphogenesis                                 |
| GOTERM_BP_ALL         | GO:0014032~neural crest cell development                               |
| GOTERM_BP_ALL         | GO:0014031~mesenchymal cell development                                |
| GOTERM_BP_ALL         | GO:0048864~stem cell development                                       |
| GOTERM_BP_ALL         | GO:0001755~neural crest cell migration                                 |
| GOTERM_BP_ALL         | GO:0045667~regulation of osteoblast differentiation                    |
|                       |                                                                        |
| Annotation Cluster 60 | Enrichment Score: 2.749016924129903                                    |
| Category              | Term                                                                   |
| GOTERM_BP_ALL         | GO:0048706~embryonic skeletal system development                       |
| GOTERM_BP_ALL         | GO:0060173~limb development                                            |
| GOTERM_BP_ALL         | GO:0048736~appendage development                                       |
| GOTERM_BP_ALL         | GO:0035107~appendage morphogenesis                                     |
| GOTERM_BP_ALL         | GO:0035108~limb morphogenesis                                          |
| GOTERM_BP_ALL         | GO:0060174~limb bud formation                                          |
| GOTERM_BP_ALL         | GO:0060021~palate development                                          |

|                       |                                                                        |
|-----------------------|------------------------------------------------------------------------|
| GOTERM_BP_ALL         | GO:0048641~regulation of skeletal muscle tissue development            |
| GOTERM_BP_ALL         | GO:0048705~skeletal system morphogenesis                               |
| GOTERM_BP_ALL         | GO:0035116~embryonic hindlimb morphogenesis                            |
| GOTERM_BP_ALL         | GO:0035137~hindlimb morphogenesis                                      |
| GOTERM_BP_ALL         | GO:0030326~embryonic limb morphogenesis                                |
| GOTERM_BP_ALL         | GO:0035113~embryonic appendage morphogenesis                           |
| GOTERM_BP_ALL         | GO:0042476~odontogenesis                                               |
| GOTERM_BP_ALL         | GO:0048704~embryonic skeletal system morphogenesis                     |
| GOTERM_BP_ALL         | GO:0042733~embryonic digit morphogenesis                               |
| GOTERM_BP_ALL         | GO:0035115~embryonic forelimb morphogenesis                            |
| GOTERM_BP_ALL         | GO:0035136~forelimb morphogenesis                                      |
| GOTERM_BP_ALL         | GO:0030278~regulation of ossification                                  |
|                       |                                                                        |
| Annotation Cluster 61 | Enrichment Score: 2.6978573474548995                                   |
| Category              | Term                                                                   |
| GOTERM_BP_ALL         | GO:0060078~regulation of postsynaptic membrane potential               |
| GOTERM_BP_ALL         | GO:0042391~regulation of membrane potential                            |
| GOTERM_BP_ALL         | GO:0050806~positive regulation of synaptic transmission                |
| GOTERM_BP_ALL         | GO:0033555~multicellular organismal response to stress                 |
| GOTERM_BP_ALL         | GO:0060079~excitatory postsynaptic potential                           |
| GOTERM_BP_ALL         | GO:0007215~glutamate receptor signaling pathway                        |
| GOTERM_BP_ALL         | GO:0099565~chemical synaptic transmission, postsynaptic                |
| GOTERM_BP_ALL         | GO:0035249~synaptic transmission, glutamatergic                        |
| GOTERM_BP_ALL         | GO:0051966~regulation of synaptic transmission, glutamatergic          |
| GOTERM_BP_ALL         | GO:0035235~ionotropic glutamate receptor signaling pathway             |
| GOTERM_BP_ALL         | GO:0060291~long-term synaptic potentiation                             |
| GOTERM_BP_ALL         | GO:2000463~positive regulation of excitatory postsynaptic potential    |
| GOTERM_BP_ALL         | GO:0050773~regulation of dendrite development                          |
| GOTERM_BP_ALL         | GO:0051968~positive regulation of synaptic transmission, glutamatergic |
| GOTERM_BP_ALL         | GO:0098815~modulation of excitatory postsynaptic potential             |
| GOTERM_BP_ALL         | GO:0042596~fear response                                               |
| GOTERM_BP_ALL         | GO:0051703~intraspecies interaction between organisms                  |
| GOTERM_BP_ALL         | GO:0035176~social behavior                                             |
| GOTERM_BP_ALL         | GO:0051705~multi-organism behavior                                     |
| GOTERM_BP_ALL         | GO:2001257~regulation of cation channel activity                       |
| GOTERM_BP_ALL         | GO:0032412~regulation of ion transmembrane transporter activity        |
|                       |                                                                        |
| Annotation Cluster 62 | Enrichment Score: 2.6889446512299964                                   |
| Category              | Term                                                                   |
| GOTERM_BP_ALL         | GO:0090596~sensory organ morphogenesis                                 |
| GOTERM_BP_ALL         | GO:0048048~embryonic eye morphogenesis                                 |
| GOTERM_BP_ALL         | GO:0048592~eye morphogenesis                                           |
| GOTERM_BP_ALL         | GO:0060900~embryonic camera-type eye formation                         |
| GOTERM_BP_ALL         | GO:0048593~camera-type eye morphogenesis                               |
| GOTERM_BP_ALL         | GO:0048596~embryonic camera-type eye morphogenesis                     |
| GOTERM_BP_ALL         | GO:0031076~embryonic camera-type eye development                       |
|                       |                                                                        |
| Annotation Cluster 63 | Enrichment Score: 2.553148843800438                                    |
| Category              | Term                                                                   |
| GOTERM_BP_ALL         | GO:0051338~regulation of transferase activity                          |
| GOTERM_BP_ALL         | GO:0044092~negative regulation of molecular function                   |

|                       |                                                                            |
|-----------------------|----------------------------------------------------------------------------|
| GOTERM_BP_ALL         | GO:0031400~negative regulation of protein modification process             |
| GOTERM_BP_ALL         | GO:0051348~negative regulation of transferase activity                     |
| GOTERM_BP_ALL         | GO:0032269~negative regulation of cellular protein metabolic process       |
| GOTERM_BP_ALL         | GO:0043086~negative regulation of catalytic activity                       |
| GOTERM_BP_ALL         | GO:0042326~negative regulation of phosphorylation                          |
| GOTERM_BP_ALL         | GO:0045936~negative regulation of phosphate metabolic process              |
| GOTERM_BP_ALL         | GO:0010563~negative regulation of phosphorus metabolic process             |
| GOTERM_BP_ALL         | GO:0051248~negative regulation of protein metabolic process                |
| GOTERM_BP_ALL         | GO:0001933~negative regulation of protein phosphorylation                  |
| GOTERM_BP_ALL         | GO:0033673~negative regulation of kinase activity                          |
| GOTERM_BP_ALL         | GO:1902532~negative regulation of intracellular signal transduction        |
| GOTERM_BP_ALL         | GO:0006469~negative regulation of protein kinase activity                  |
| GOTERM_BP_ALL         | GO:0071901~negative regulation of protein serine/threonine kinase activity |
|                       |                                                                            |
| Annotation Cluster 64 | Enrichment Score: 2.5438293475803793                                       |
| Category              | Term                                                                       |
| GOTERM_BP_ALL         | GO:0060341~regulation of cellular localization                             |
| GOTERM_BP_ALL         | GO:1902582~single-organism intracellular transport                         |
| GOTERM_BP_ALL         | GO:1903530~regulation of secretion by cell                                 |
| GOTERM_BP_ALL         | GO:0051640~organelle localization                                          |
| GOTERM_BP_ALL         | GO:0051046~regulation of secretion                                         |
| GOTERM_BP_ALL         | GO:0051656~establishment of organelle localization                         |
| GOTERM_BP_ALL         | GO:1902580~single-organism cellular localization                           |
| GOTERM_BP_ALL         | GO:0060627~regulation of vesicle-mediated transport                        |
| GOTERM_BP_ALL         | GO:0051649~establishment of localization in cell                           |
| GOTERM_BP_ALL         | GO:0099504~synaptic vesicle cycle                                          |
| GOTERM_BP_ALL         | GO:0051047~positive regulation of secretion                                |
| GOTERM_BP_ALL         | GO:0032386~regulation of intracellular transport                           |
| GOTERM_BP_ALL         | GO:0046928~regulation of neurotransmitter secretion                        |
| GOTERM_BP_ALL         | GO:0097479~synaptic vesicle localization                                   |
| GOTERM_BP_ALL         | GO:0061024~membrane organization                                           |
| GOTERM_BP_ALL         | GO:0045956~positive regulation of calcium ion-dependent exocytosis         |
| GOTERM_BP_ALL         | GO:0006836~neurotransmitter transport                                      |
| GOTERM_BP_ALL         | GO:0051588~regulation of neurotransmitter transport                        |
| GOTERM_BP_ALL         | GO:1903307~positive regulation of regulated secretory pathway              |
| GOTERM_BP_ALL         | GO:0017157~regulation of exocytosis                                        |
| GOTERM_BP_ALL         | GO:0046907~intracellular transport                                         |
| GOTERM_BP_ALL         | GO:0051648~vesicle localization                                            |
| GOTERM_BP_ALL         | GO:0001505~regulation of neurotransmitter levels                           |
| GOTERM_BP_ALL         | GO:1903532~positive regulation of secretion by cell                        |
| GOTERM_BP_ALL         | GO:0032388~positive regulation of intracellular transport                  |
| GOTERM_BP_ALL         | GO:0097480~establishment of synaptic vesicle localization                  |
| GOTERM_BP_ALL         | GO:0048489~synaptic vesicle transport                                      |
| GOTERM_BP_ALL         | GO:0045055~regulated exocytosis                                            |
| GOTERM_BP_ALL         | GO:0099003~vesicle-mediated transport in synapse                           |
| GOTERM_BP_ALL         | GO:0016192~vesicle-mediated transport                                      |
| GOTERM_BP_ALL         | GO:0006887~exocytosis                                                      |
| GOTERM_BP_ALL         | GO:1902803~regulation of synaptic vesicle transport                        |
| GOTERM_BP_ALL         | GO:0051650~establishment of vesicle localization                           |
| GOTERM_BP_ALL         | GO:1903305~regulation of regulated secretory pathway                       |
| GOTERM_BP_ALL         | GO:0031630~regulation of synaptic vesicle fusion to presynaptic membrane   |

|                       |                                                                                  |
|-----------------------|----------------------------------------------------------------------------------|
| GOTERM_BP_ALL         | GO:0051954~positive regulation of amine transport                                |
| GOTERM_BP_ALL         | GO:0035493~SNARE complex assembly                                                |
| GOTERM_BP_ALL         | GO:0044802~single-organism membrane organization                                 |
| GOTERM_BP_ALL         | GO:0045921~positive regulation of exocytosis                                     |
| GOTERM_BP_ALL         | GO:0099643~signal release from synapse                                           |
| GOTERM_BP_ALL         | GO:0007269~neurotransmitter secretion                                            |
| GOTERM_BP_ALL         | GO:0001956~positive regulation of neurotransmitter secretion                     |
| GOTERM_BP_ALL         | GO:0017156~calcium ion regulated exocytosis                                      |
| GOTERM_BP_ALL         | GO:0099531~presynaptic process involved in chemical synaptic transmission        |
| GOTERM_BP_ALL         | GO:0048488~synaptic vesicle endocytosis                                          |
| GOTERM_BP_ALL         | GO:0017158~regulation of calcium ion-dependent exocytosis                        |
| GOTERM_BP_ALL         | GO:0051590~positive regulation of neurotransmitter transport                     |
| GOTERM_BP_ALL         | GO:0016079~synaptic vesicle exocytosis                                           |
| GOTERM_BP_ALL         | GO:0031338~regulation of vesicle fusion                                          |
| GOTERM_BP_ALL         | GO:2000300~regulation of synaptic vesicle exocytosis                             |
| GOTERM_BP_ALL         | GO:0036465~synaptic vesicle recycling                                            |
| GOTERM_BP_ALL         | GO:0072583~clathrin-dependent endocytosis                                        |
| GOTERM_BP_ALL         | GO:0051952~regulation of amine transport                                         |
| GOTERM_BP_ALL         | GO:0006898~receptor-mediated endocytosis                                         |
| GOTERM_BP_ALL         | GO:0015837~amine transport                                                       |
| GOTERM_BP_ALL         | GO:0006906~vesicle fusion                                                        |
| GOTERM_BP_ALL         | GO:0090174~organelle membrane fusion                                             |
| GOTERM_BP_ALL         | GO:0016050~vesicle organization                                                  |
| GOTERM_BP_ALL         | GO:0061025~membrane fusion                                                       |
| GOTERM_BP_ALL         | GO:0048278~vesicle docking                                                       |
| GOTERM_BP_ALL         | GO:0022406~membrane docking                                                      |
| GOTERM_BP_ALL         | GO:0044801~single-organism membrane fusion                                       |
| GOTERM_BP_ALL         | GO:0048284~organelle fusion                                                      |
|                       |                                                                                  |
| Annotation Cluster 65 | Enrichment Score: 2.4934831316653367                                             |
| Category              | Term                                                                             |
| GOTERM_BP_ALL         | GO:0010769~regulation of cell morphogenesis involved in differentiation          |
| GOTERM_BP_ALL         | GO:0097061~dendritic spine organization                                          |
| GOTERM_BP_ALL         | GO:0016358~dendrite development                                                  |
| GOTERM_BP_ALL         | GO:0060997~dendritic spine morphogenesis                                         |
| GOTERM_BP_ALL         | GO:0048813~dendrite morphogenesis                                                |
| GOTERM_BP_ALL         | GO:0060996~dendritic spine development                                           |
| GOTERM_BP_ALL         | GO:0048814~regulation of dendrite morphogenesis                                  |
| GOTERM_BP_ALL         | GO:0031345~negative regulation of cell projection organization                   |
| GOTERM_BP_ALL         | GO:0050773~regulation of dendrite development                                    |
| GOTERM_BP_ALL         | GO:0010977~negative regulation of neuron projection development                  |
| GOTERM_BP_ALL         | GO:0060998~regulation of dendritic spine development                             |
| GOTERM_BP_ALL         | GO:0061001~regulation of dendritic spine morphogenesis                           |
| GOTERM_BP_ALL         | GO:0050774~negative regulation of dendrite morphogenesis                         |
| GOTERM_BP_ALL         | GO:0008361~regulation of cell size                                               |
| GOTERM_BP_ALL         | GO:2000171~negative regulation of dendrite development                           |
| GOTERM_BP_ALL         | GO:0010771~negative regulation of cell morphogenesis involved in differentiation |
| GOTERM_BP_ALL         | GO:1900006~positive regulation of dendrite development                           |
| GOTERM_BP_ALL         | GO:0032535~regulation of cellular component size                                 |
|                       |                                                                                  |



|                       |                                                                           |
|-----------------------|---------------------------------------------------------------------------|
| Annotation Cluster 66 | Enrichment Score: 2.475218736519286                                       |
| Category              | Term                                                                      |
| GOTERM_BP_ALL         | GO:0055123~digestive system development                                   |
| GOTERM_BP_ALL         | GO:0048546~digestive tract morphogenesis                                  |
| GOTERM_BP_ALL         | GO:0048565~digestive tract development                                    |
| GOTERM_BP_ALL         | GO:0048557~embryonic digestive tract morphogenesis                        |
| GOTERM_BP_ALL         | GO:0048566~embryonic digestive tract development                          |
| GOTERM_BP_ALL         | GO:0061053~somite development                                             |
| GOTERM_BP_ALL         | GO:0002695~negative regulation of leukocyte activation                    |
| GOTERM_BP_ALL         | GO:0050866~negative regulation of cell activation                         |
|                       |                                                                           |
| Annotation Cluster 67 | Enrichment Score: 2.4444657408729484                                      |
| Category              | Term                                                                      |
| GOTERM_BP_ALL         | GO:0051932~synaptic transmission, GABAergic                               |
| GOTERM_BP_ALL         | GO:0060359~response to ammonium ion                                       |
| GOTERM_BP_ALL         | GO:1904862~inhibitory synapse assembly                                    |
| GOTERM_BP_ALL         | GO:0071420~cellular response to histamine                                 |
| GOTERM_BP_ALL         | GO:0007416~synapse assembly                                               |
| GOTERM_BP_ALL         | GO:0007214~gamma-aminobutyric acid signaling pathway                      |
| GOTERM_BP_ALL         | GO:1902476~chloride transmembrane transport                               |
| GOTERM_BP_ALL         | GO:0034776~response to histamine                                          |
| GOTERM_BP_ALL         | GO:0006821~chloride transport                                             |
| GOTERM_BP_ALL         | GO:0098661~inorganic anion transmembrane transport                        |
| GOTERM_BP_ALL         | GO:0098656~anion transmembrane transport                                  |
| GOTERM_BP_ALL         | GO:0015698~inorganic anion transport                                      |
| GOTERM_BP_ALL         | GO:0071242~cellular response to ammonium ion                              |
| GOTERM_BP_ALL         | GO:0006820~anion transport                                                |
| GOTERM_BP_ALL         | GO:0007186~G-protein coupled receptor signaling pathway                   |
|                       |                                                                           |
| Annotation Cluster 68 | Enrichment Score: 2.4240865896161785                                      |
| Category              | Term                                                                      |
| GOTERM_BP_ALL         | GO:0031060~regulation of histone methylation                              |
| GOTERM_BP_ALL         | GO:0043414~macromolecule methylation                                      |
| GOTERM_BP_ALL         | GO:0032259~methylation                                                    |
| GOTERM_BP_ALL         | GO:0009791~post-embryonic development                                     |
| GOTERM_BP_ALL         | GO:0044728~DNA methylation or demethylation                               |
| GOTERM_BP_ALL         | GO:0006304~DNA modification                                               |
| GOTERM_BP_ALL         | GO:0006305~DNA alkylation                                                 |
| GOTERM_BP_ALL         | GO:0006306~DNA methylation                                                |
|                       |                                                                           |
| Annotation Cluster 69 | Enrichment Score: 2.415176653848473                                       |
| Category              | Term                                                                      |
| GOTERM_BP_ALL         | GO:0044087~regulation of cellular component biogenesis                    |
| GOTERM_BP_ALL         | GO:0006352~DNA-templated transcription, initiation                        |
| GOTERM_BP_ALL         | GO:0043254~regulation of protein complex assembly                         |
| GOTERM_BP_ALL         | GO:2000142~regulation of DNA-templated transcription, initiation          |
| GOTERM_BP_ALL         | GO:2000144~positive regulation of DNA-templated transcription, initiation |
| GOTERM_BP_ALL         | GO:0031334~positive regulation of protein complex assembly                |
| GOTERM_BP_ALL         | GO:0044089~positive regulation of cellular component biogenesis           |
|                       |                                                                           |
| Annotation Cluster 70 | Enrichment Score: 2.3453724721640676                                      |

|                       |                                                                |
|-----------------------|----------------------------------------------------------------|
| Category              | Term                                                           |
| GOTERM_BP_ALL         | GO:1902580~single-organism cellular localization               |
| GOTERM_BP_ALL         | GO:0051649~establishment of localization in cell               |
| GOTERM_BP_ALL         | GO:0034613~cellular protein localization                       |
| GOTERM_BP_ALL         | GO:0070727~cellular macromolecule localization                 |
| GOTERM_BP_ALL         | GO:0008104~protein localization                                |
| GOTERM_BP_ALL         | GO:0033036~macromolecule localization                          |
| GOTERM_BP_ALL         | GO:0033365~protein localization to organelle                   |
| GOTERM_BP_ALL         | GO:0032880~regulation of protein localization                  |
| GOTERM_BP_ALL         | GO:0046907~intracellular transport                             |
| GOTERM_BP_ALL         | GO:0071705~nitrogen compound transport                         |
| GOTERM_BP_ALL         | GO:0090087~regulation of peptide transport                     |
| GOTERM_BP_ALL         | GO:0070201~regulation of establishment of protein localization |
| GOTERM_BP_ALL         | GO:0042886~amide transport                                     |
| GOTERM_BP_ALL         | GO:0071702~organic substance transport                         |
| GOTERM_BP_ALL         | GO:0015833~peptide transport                                   |
| GOTERM_BP_ALL         | GO:0051223~regulation of protein transport                     |
| GOTERM_BP_ALL         | GO:0015031~protein transport                                   |
| GOTERM_BP_ALL         | GO:0006886~intracellular protein transport                     |
| GOTERM_BP_ALL         | GO:0045184~establishment of protein localization               |
| GOTERM_BP_ALL         | GO:0006605~protein targeting                                   |
|                       |                                                                |
| Annotation Cluster 71 | Enrichment Score: 2.2821797359816793                           |
| Category              | Term                                                           |
| GOTERM_BP_ALL         | GO:0009743~response to carbohydrate                            |
| GOTERM_BP_ALL         | GO:0009749~response to glucose                                 |
| GOTERM_BP_ALL         | GO:0009746~response to hexose                                  |
| GOTERM_BP_ALL         | GO:0034284~response to monosaccharide                          |
| GOTERM_BP_ALL         | GO:0071333~cellular response to glucose stimulus               |
| GOTERM_BP_ALL         | GO:0071331~cellular response to hexose stimulus                |
| GOTERM_BP_ALL         | GO:0071326~cellular response to monosaccharide stimulus        |
| GOTERM_BP_ALL         | GO:0042593~glucose homeostasis                                 |
| GOTERM_BP_ALL         | GO:0033500~carbohydrate homeostasis                            |
| GOTERM_BP_ALL         | GO:0071322~cellular response to carbohydrate stimulus          |
| GOTERM_BP_ALL         | GO:0001678~cellular glucose homeostasis                        |
| GOTERM_BP_ALL         | GO:0050796~regulation of insulin secretion                     |
| GOTERM_BP_ALL         | GO:0030073~insulin secretion                                   |
|                       |                                                                |
| Annotation Cluster 72 | Enrichment Score: 2.2633599432844442                           |
| Category              | Term                                                           |
| GOTERM_BP_ALL         | GO:0009991~response to extracellular stimulus                  |
| GOTERM_BP_ALL         | GO:0031668~cellular response to extracellular stimulus         |
| GOTERM_BP_ALL         | GO:0031667~response to nutrient levels                         |
| GOTERM_BP_ALL         | GO:0071496~cellular response to external stimulus              |
| GOTERM_BP_ALL         | GO:0031669~cellular response to nutrient levels                |
|                       |                                                                |
| Annotation Cluster 73 | Enrichment Score: 2.260025927088074                            |
| Category              | Term                                                           |
| GOTERM_BP_ALL         | GO:0048705~skeletal system morphogenesis                       |
| GOTERM_BP_ALL         | GO:0051216~cartilage development                               |
| GOTERM_BP_ALL         | GO:0061448~connective tissue development                       |

|                       |                                                                             |
|-----------------------|-----------------------------------------------------------------------------|
| GOTERM_BP_ALL         | GO:0002062~chondrocyte differentiation                                      |
|                       |                                                                             |
| Annotation Cluster 74 | Enrichment Score: 2.2330620609233516                                        |
| Category              | Term                                                                        |
| GOTERM_BP_ALL         | GO:0010717~regulation of epithelial to mesenchymal transition               |
| GOTERM_BP_ALL         | GO:0001837~epithelial to mesenchymal transition                             |
| GOTERM_BP_ALL         | GO:0010719~negative regulation of epithelial to mesenchymal transition      |
| GOTERM_BP_ALL         | GO:1905331~negative regulation of morphogenesis of an epithelium            |
| GOTERM_BP_ALL         | GO:0051896~regulation of protein kinase B signaling                         |
| GOTERM_BP_ALL         | GO:0010718~positive regulation of epithelial to mesenchymal transition      |
|                       |                                                                             |
| Annotation Cluster 75 | Enrichment Score: 2.232778261874327                                         |
| Category              | Term                                                                        |
| GOTERM_BP_ALL         | GO:0021782~glial cell development                                           |
| GOTERM_BP_ALL         | GO:0048708~astrocyte differentiation                                        |
| GOTERM_BP_ALL         | GO:0014002~astrocyte development                                            |
|                       |                                                                             |
| Annotation Cluster 76 | Enrichment Score: 2.2327508400011555                                        |
| Category              | Term                                                                        |
| GOTERM_BP_ALL         | GO:0001708~cell fate specification                                          |
| GOTERM_BP_ALL         | GO:0007369~gastrulation                                                     |
| GOTERM_BP_ALL         | GO:0060795~cell fate commitment involved in formation of primary germ layer |
| GOTERM_BP_ALL         | GO:0001711~endodermal cell fate commitment                                  |
| GOTERM_BP_ALL         | GO:0001704~formation of primary germ layer                                  |
| GOTERM_BP_ALL         | GO:0007492~endoderm development                                             |
| GOTERM_BP_ALL         | GO:0035987~endodermal cell differentiation                                  |
| GOTERM_BP_ALL         | GO:0001706~endoderm formation                                               |
|                       |                                                                             |
| Annotation Cluster 77 | Enrichment Score: 2.1824225021456827                                        |
| Category              | Term                                                                        |
| GOTERM_BP_ALL         | GO:0048485~sympathetic nervous system development                           |
| GOTERM_BP_ALL         | GO:0003208~cardiac ventricle morphogenesis                                  |
| GOTERM_BP_ALL         | GO:0003206~cardiac chamber morphogenesis                                    |
| GOTERM_BP_ALL         | GO:0003211~cardiac ventricle formation                                      |
| GOTERM_BP_ALL         | GO:0003205~cardiac chamber development                                      |
| GOTERM_BP_ALL         | GO:0003207~cardiac chamber formation                                        |
| GOTERM_BP_ALL         | GO:0003231~cardiac ventricle development                                    |
| GOTERM_BP_ALL         | GO:0003215~cardiac right ventricle morphogenesis                            |
| GOTERM_BP_ALL         | GO:0003279~cardiac septum development                                       |
| GOTERM_BP_ALL         | GO:0060840~artery development                                               |
| GOTERM_BP_ALL         | GO:0060411~cardiac septum morphogenesis                                     |
| GOTERM_BP_ALL         | GO:0048844~artery morphogenesis                                             |
| GOTERM_BP_ALL         | GO:0003281~ventricular septum development                                   |
|                       |                                                                             |
| Annotation Cluster 78 | Enrichment Score: 2.1812724505392875                                        |
| Category              | Term                                                                        |
| GOTERM_BP_ALL         | GO:0030318~melanocyte differentiation                                       |
| GOTERM_BP_ALL         | GO:0050931~pigment cell differentiation                                     |
| GOTERM_BP_ALL         | GO:0048066~developmental pigmentation                                       |
| GOTERM_BP_ALL         | GO:0043473~pigmentation                                                     |

|                       |                                                                                |
|-----------------------|--------------------------------------------------------------------------------|
| Annotation Cluster 79 | Enrichment Score: 2.1676779302514366                                           |
| Category              | Term                                                                           |
| GOTERM_BP_ALL         | GO:0006476~protein deacetylation                                               |
| GOTERM_BP_ALL         | GO:0035601~protein deacylation                                                 |
| GOTERM_BP_ALL         | GO:0098732~macromolecule deacylation                                           |
| GOTERM_BP_ALL         | GO:0016575~histone deacetylation                                               |
|                       |                                                                                |
| Annotation Cluster 80 | Enrichment Score: 2.151160068980582                                            |
| Category              | Term                                                                           |
| GOTERM_BP_ALL         | GO:0007163~establishment or maintenance of cell polarity                       |
| GOTERM_BP_ALL         | GO:0001738~morphogenesis of a polarized epithelium                             |
| GOTERM_BP_ALL         | GO:0030010~establishment of cell polarity                                      |
|                       |                                                                                |
| Annotation Cluster 81 | Enrichment Score: 2.128366892415545                                            |
| Category              | Term                                                                           |
| GOTERM_BP_ALL         | GO:0060359~response to ammonium ion                                            |
| GOTERM_BP_ALL         | GO:0042220~response to cocaine                                                 |
| GOTERM_BP_ALL         | GO:0043279~response to alkaloid                                                |
|                       |                                                                                |
| Annotation Cluster 82 | Enrichment Score: 2.1232867671901228                                           |
| Category              | Term                                                                           |
| GOTERM_BP_ALL         | GO:0048732~gland development                                                   |
| GOTERM_BP_ALL         | GO:0048589~developmental growth                                                |
| GOTERM_BP_ALL         | GO:0007548~sex differentiation                                                 |
| GOTERM_BP_ALL         | GO:0048608~reproductive structure development                                  |
| GOTERM_BP_ALL         | GO:0061458~reproductive system development                                     |
| GOTERM_BP_ALL         | GO:0003006~developmental process involved in reproduction                      |
| GOTERM_BP_ALL         | GO:0022414~reproductive process                                                |
| GOTERM_BP_ALL         | GO:0000003~reproduction                                                        |
| GOTERM_BP_ALL         | GO:0044702~single organism reproductive process                                |
| GOTERM_BP_ALL         | GO:0008406~gonad development                                                   |
| GOTERM_BP_ALL         | GO:0045137~development of primary sexual characteristics                       |
| GOTERM_BP_ALL         | GO:0006997~nucleus organization                                                |
| GOTERM_BP_ALL         | GO:0048609~multicellular organismal reproductive process                       |
| GOTERM_BP_ALL         | GO:0032504~multicellular organism reproduction                                 |
| GOTERM_BP_ALL         | GO:0019953~sexual reproduction                                                 |
| GOTERM_BP_ALL         | GO:0044703~multi-organism reproductive process                                 |
| GOTERM_BP_ALL         | GO:0051704~multi-organism process                                              |
| GOTERM_BP_ALL         | GO:0007281~germ cell development                                               |
| GOTERM_BP_ALL         | GO:0007276~gamete generation                                                   |
| GOTERM_BP_ALL         | GO:0022412~cellular process involved in reproduction in multicellular organism |
| GOTERM_BP_ALL         | GO:0007286~spermatid development                                               |
| GOTERM_BP_ALL         | GO:0048515~spermatid differentiation                                           |
| GOTERM_BP_ALL         | GO:0007283~spermatogenesis                                                     |
| GOTERM_BP_ALL         | GO:0048232~male gamete generation                                              |
|                       |                                                                                |
| Annotation Cluster 83 | Enrichment Score: 2.12157421878766                                             |
| Category              | Term                                                                           |
| GOTERM_BP_ALL         | GO:0060736~prostate gland growth                                               |

|                       |                                                                              |
|-----------------------|------------------------------------------------------------------------------|
| GOTERM_BP_ALL         | GO:0035265~organ growth                                                      |
| GOTERM_BP_ALL         | GO:0030850~prostate gland development                                        |
|                       |                                                                              |
| Annotation Cluster 84 | Enrichment Score: 2.1112154672240595                                         |
| Category              | Term                                                                         |
| GOTERM_BP_ALL         | GO:0001558~regulation of cell growth                                         |
| GOTERM_BP_ALL         | GO:0045926~negative regulation of growth                                     |
| GOTERM_BP_ALL         | GO:0030308~negative regulation of cell growth                                |
| GOTERM_BP_ALL         | GO:0006275~regulation of DNA replication                                     |
|                       |                                                                              |
| Annotation Cluster 85 | Enrichment Score: 2.0765990438777546                                         |
| Category              | Term                                                                         |
| GOTERM_BP_ALL         | GO:0030901~midbrain development                                              |
| GOTERM_BP_ALL         | GO:0045995~regulation of embryonic development                               |
| GOTERM_BP_ALL         | GO:0040019~positive regulation of embryonic development                      |
| GOTERM_BP_ALL         | GO:0071542~dopaminergic neuron differentiation                               |
| GOTERM_BP_ALL         | GO:0040036~regulation of fibroblast growth factor receptor signaling pathway |
| GOTERM_BP_ALL         | GO:0009948~anterior/posterior axis specification                             |
| GOTERM_BP_ALL         | GO:0009798~axis specification                                                |
|                       |                                                                              |
| Annotation Cluster 86 | Enrichment Score: 2.047775244167954                                          |
| Category              | Term                                                                         |
| GOTERM_BP_ALL         | GO:0032940~secretion by cell                                                 |
| GOTERM_BP_ALL         | GO:0046903~secretion                                                         |
| GOTERM_BP_ALL         | GO:1903530~regulation of secretion by cell                                   |
| GOTERM_BP_ALL         | GO:0051046~regulation of secretion                                           |
| GOTERM_BP_ALL         | GO:0051050~positive regulation of transport                                  |
| GOTERM_BP_ALL         | GO:0023061~signal release                                                    |
| GOTERM_BP_ALL         | GO:0051047~positive regulation of secretion                                  |
| GOTERM_BP_ALL         | GO:1903532~positive regulation of secretion by cell                          |
| GOTERM_BP_ALL         | GO:0046879~hormone secretion                                                 |
| GOTERM_BP_ALL         | GO:0009914~hormone transport                                                 |
| GOTERM_BP_ALL         | GO:0042593~glucose homeostasis                                               |
| GOTERM_BP_ALL         | GO:0033500~carbohydrate homeostasis                                          |
| GOTERM_BP_ALL         | GO:0046883~regulation of hormone secretion                                   |
| GOTERM_BP_ALL         | GO:0051051~negative regulation of transport                                  |
| GOTERM_BP_ALL         | GO:0010817~regulation of hormone levels                                      |
| GOTERM_BP_ALL         | GO:0030072~peptide hormone secretion                                         |
| GOTERM_BP_ALL         | GO:0090087~regulation of peptide transport                                   |
| GOTERM_BP_ALL         | GO:0070201~regulation of establishment of protein localization               |
| GOTERM_BP_ALL         | GO:0051222~positive regulation of protein transport                          |
| GOTERM_BP_ALL         | GO:0090276~regulation of peptide hormone secretion                           |
| GOTERM_BP_ALL         | GO:0051223~regulation of protein transport                                   |
| GOTERM_BP_ALL         | GO:0002790~peptide secretion                                                 |
| GOTERM_BP_ALL         | GO:1903531~negative regulation of secretion by cell                          |
| GOTERM_BP_ALL         | GO:0009306~protein secretion                                                 |
| GOTERM_BP_ALL         | GO:0031018~endocrine pancreas development                                    |
| GOTERM_BP_ALL         | GO:0002791~regulation of peptide secretion                                   |
| GOTERM_BP_ALL         | GO:0051048~negative regulation of secretion                                  |
| GOTERM_BP_ALL         | GO:0050708~regulation of protein secretion                                   |

|                       |                                                                                           |
|-----------------------|-------------------------------------------------------------------------------------------|
| GOTERM_BP_ALL         | GO:0046887~positive regulation of hormone secretion                                       |
| GOTERM_BP_ALL         | GO:0050709~negative regulation of protein secretion                                       |
| GOTERM_BP_ALL         | GO:0002792~negative regulation of peptide secretion                                       |
| GOTERM_BP_ALL         | GO:0051224~negative regulation of protein transport                                       |
| GOTERM_BP_ALL         | GO:1904950~negative regulation of establishment of protein localization                   |
| GOTERM_BP_ALL         | GO:0050796~regulation of insulin secretion                                                |
| GOTERM_BP_ALL         | GO:0030073~insulin secretion                                                              |
| GOTERM_BP_ALL         | GO:0050714~positive regulation of protein secretion                                       |
| GOTERM_BP_ALL         | GO:0002793~positive regulation of peptide secretion                                       |
|                       |                                                                                           |
| Annotation Cluster 87 | Enrichment Score: 2.024681119758309                                                       |
| Category              | Term                                                                                      |
| GOTERM_BP_ALL         | GO:1902893~regulation of pri-miRNA transcription from RNA polymerase II promoter          |
| GOTERM_BP_ALL         | GO:2000647~negative regulation of stem cell proliferation                                 |
| GOTERM_BP_ALL         | GO:0061614~pri-miRNA transcription from RNA polymerase II promoter                        |
| GOTERM_BP_ALL         | GO:1902895~positive regulation of pri-miRNA transcription from RNA polymerase II promoter |
|                       |                                                                                           |
| Annotation Cluster 88 | Enrichment Score: 2.0155112836713607                                                      |
| Category              | Term                                                                                      |
| GOTERM_BP_ALL         | GO:0014065~phosphatidylinositol 3-kinase signaling                                        |
| GOTERM_BP_ALL         | GO:0048015~phosphatidylinositol-mediated signaling                                        |
| GOTERM_BP_ALL         | GO:0048017~inositol lipid-mediated signaling                                              |
| GOTERM_BP_ALL         | GO:0043491~protein kinase B signaling                                                     |
| GOTERM_BP_ALL         | GO:0014066~regulation of phosphatidylinositol 3-kinase signaling                          |
| GOTERM_BP_ALL         | GO:0051896~regulation of protein kinase B signaling                                       |
| GOTERM_BP_ALL         | GO:0014067~negative regulation of phosphatidylinositol 3-kinase signaling                 |
| GOTERM_BP_ALL         | GO:0051898~negative regulation of protein kinase B signaling                              |
| GOTERM_BP_ALL         | GO:0051897~positive regulation of protein kinase B signaling                              |
| GOTERM_BP_ALL         | GO:0014068~positive regulation of phosphatidylinositol 3-kinase signaling                 |
|                       |                                                                                           |
| Annotation Cluster 89 | Enrichment Score: 2.0065904361998568                                                      |
| Category              | Term                                                                                      |
| GOTERM_BP_ALL         | GO:0007405~neuroblast proliferation                                                       |
| GOTERM_BP_ALL         | GO:1902692~regulation of neuroblast proliferation                                         |
| GOTERM_BP_ALL         | GO:0001656~metanephros development                                                        |
| GOTERM_BP_ALL         | GO:0048709~oligodendrocyte differentiation                                                |
| GOTERM_BP_ALL         | GO:2000177~regulation of neural precursor cell proliferation                              |
| GOTERM_BP_ALL         | GO:1902106~negative regulation of leukocyte differentiation                               |
| GOTERM_BP_ALL         | GO:0070663~regulation of leukocyte proliferation                                          |
| GOTERM_BP_ALL         | GO:0048713~regulation of oligodendrocyte differentiation                                  |
| GOTERM_BP_ALL         | GO:0045685~regulation of glial cell differentiation                                       |
| GOTERM_BP_ALL         | GO:0043588~skin development                                                               |
| GOTERM_BP_ALL         | GO:0001942~hair follicle development                                                      |
| GOTERM_BP_ALL         | GO:0022404~molting cycle process                                                          |
| GOTERM_BP_ALL         | GO:0022405~hair cycle process                                                             |
| GOTERM_BP_ALL         | GO:0098773~skin epidermis development                                                     |
| GOTERM_BP_ALL         | GO:0042633~hair cycle                                                                     |
| GOTERM_BP_ALL         | GO:0042303~molting cycle                                                                  |
| GOTERM_BP_ALL         | GO:0008544~epidermis development                                                          |

|                       |                                                                      |
|-----------------------|----------------------------------------------------------------------|
| Annotation Cluster 90 | Enrichment Score: 1.9965952406642915                                 |
| Category              | Term                                                                 |
| GOTERM_BP_ALL         | GO:0021510~spinal cord development                                   |
| GOTERM_BP_ALL         | GO:0021517~ventral spinal cord development                           |
| GOTERM_BP_ALL         | GO:0021515~cell differentiation in spinal cord                       |
| GOTERM_BP_ALL         | GO:0021522~spinal cord motor neuron differentiation                  |
| Annotation Cluster 91 | Enrichment Score: 1.9830428588509526                                 |
| Category              | Term                                                                 |
| GOTERM_BP_ALL         | GO:0007519~skeletal muscle tissue development                        |
| GOTERM_BP_ALL         | GO:0001649~osteoblast differentiation                                |
| GOTERM_BP_ALL         | GO:0060538~skeletal muscle organ development                         |
| GOTERM_BP_ALL         | GO:0061005~cell differentiation involved in kidney development       |
| GOTERM_BP_ALL         | GO:0048641~regulation of skeletal muscle tissue development          |
| GOTERM_BP_ALL         | GO:0048643~positive regulation of skeletal muscle tissue development |
| GOTERM_BP_ALL         | GO:0050870~positive regulation of T cell activation                  |
| GOTERM_BP_ALL         | GO:0022409~positive regulation of cell-cell adhesion                 |
| GOTERM_BP_ALL         | GO:0048645~animal organ formation                                    |
| GOTERM_BP_ALL         | GO:0051145~smooth muscle cell differentiation                        |
| GOTERM_BP_ALL         | GO:1903039~positive regulation of leukocyte cell-cell adhesion       |
| GOTERM_BP_ALL         | GO:0070661~leukocyte proliferation                                   |
| GOTERM_BP_ALL         | GO:0003151~outflow tract morphogenesis                               |
| GOTERM_BP_ALL         | GO:0048771~tissue remodeling                                         |
| GOTERM_BP_ALL         | GO:0046651~lymphocyte proliferation                                  |
| GOTERM_BP_ALL         | GO:0101023~vascular endothelial cell proliferation                   |
| GOTERM_BP_ALL         | GO:0032943~mononuclear cell proliferation                            |
| GOTERM_BP_ALL         | GO:1905562~regulation of vascular endothelial cell proliferation     |
| GOTERM_BP_ALL         | GO:0070663~regulation of leukocyte proliferation                     |
| GOTERM_BP_ALL         | GO:0050670~regulation of lymphocyte proliferation                    |
| GOTERM_BP_ALL         | GO:0042104~positive regulation of activated T cell proliferation     |
| GOTERM_BP_ALL         | GO:0032944~regulation of mononuclear cell proliferation              |
| GOTERM_BP_ALL         | GO:0048636~positive regulation of muscle organ development           |
| GOTERM_BP_ALL         | GO:0045844~positive regulation of striated muscle tissue development |
| GOTERM_BP_ALL         | GO:1901863~positive regulation of muscle tissue development          |
| GOTERM_BP_ALL         | GO:0045669~positive regulation of osteoblast differentiation         |
| GOTERM_BP_ALL         | GO:0009855~determination of bilateral symmetry                       |
| GOTERM_BP_ALL         | GO:0009799~specification of symmetry                                 |
| GOTERM_BP_ALL         | GO:0035050~embryonic heart tube development                          |
| GOTERM_BP_ALL         | GO:0050671~positive regulation of lymphocyte proliferation           |
| GOTERM_BP_ALL         | GO:0032946~positive regulation of mononuclear cell proliferation     |
| GOTERM_BP_ALL         | GO:0045667~regulation of osteoblast differentiation                  |
| GOTERM_BP_ALL         | GO:0070665~positive regulation of leukocyte proliferation            |
| GOTERM_BP_ALL         | GO:0046006~regulation of activated T cell proliferation              |
| GOTERM_BP_ALL         | GO:0030278~regulation of ossification                                |
| GOTERM_BP_ALL         | GO:0050798~activated T cell proliferation                            |
| GOTERM_BP_ALL         | GO:0042102~positive regulation of T cell proliferation               |
| GOTERM_BP_ALL         | GO:0045778~positive regulation of ossification                       |
| GOTERM_BP_ALL         | GO:0042129~regulation of T cell proliferation                        |
| GOTERM_BP_ALL         | GO:0014902~myotube differentiation                                   |
| GOTERM_BP_ALL         | GO:0042098~T cell proliferation                                      |

|                       |                                                                             |
|-----------------------|-----------------------------------------------------------------------------|
| GOTERM_BP_ALL         | GO:0002695~negative regulation of leukocyte activation                      |
| GOTERM_BP_ALL         | GO:0050866~negative regulation of cell activation                           |
| GOTERM_BP_ALL         | GO:0051250~negative regulation of lymphocyte activation                     |
|                       |                                                                             |
| Annotation Cluster 92 | Enrichment Score: 1.9755288688611632                                        |
| Category              | Term                                                                        |
| GOTERM_BP_ALL         | GO:0007265~Ras protein signal transduction                                  |
| GOTERM_BP_ALL         | GO:0007264~small GTPase mediated signal transduction                        |
| GOTERM_BP_ALL         | GO:0016601~Rac protein signal transduction                                  |
| GOTERM_BP_ALL         | GO:0030029~actin filament-based process                                     |
| GOTERM_BP_ALL         | GO:0046578~regulation of Ras protein signal transduction                    |
| GOTERM_BP_ALL         | GO:0030036~actin cytoskeleton organization                                  |
| GOTERM_BP_ALL         | GO:0051056~regulation of small GTPase mediated signal transduction          |
| GOTERM_BP_ALL         | GO:0046580~negative regulation of Ras protein signal transduction           |
| GOTERM_BP_ALL         | GO:0051058~negative regulation of small GTPase mediated signal transduction |
|                       |                                                                             |
| Annotation Cluster 93 | Enrichment Score: 1.9310325902581853                                        |
| Category              | Term                                                                        |
| GOTERM_BP_ALL         | GO:0070482~response to oxygen levels                                        |
| GOTERM_BP_ALL         | GO:0001666~response to hypoxia                                              |
| GOTERM_BP_ALL         | GO:0036293~response to decreased oxygen levels                              |
| GOTERM_BP_ALL         | GO:0007568~aging                                                            |
| GOTERM_BP_ALL         | GO:0071453~cellular response to oxygen levels                               |
| GOTERM_BP_ALL         | GO:0090398~cellular senescence                                              |
| GOTERM_BP_ALL         | GO:0090342~regulation of cell aging                                         |
| GOTERM_BP_ALL         | GO:0071456~cellular response to hypoxia                                     |
| GOTERM_BP_ALL         | GO:0036294~cellular response to decreased oxygen levels                     |
| GOTERM_BP_ALL         | GO:0007569~cell aging                                                       |
| GOTERM_BP_ALL         | GO:2000772~regulation of cellular senescence                                |
| GOTERM_BP_ALL         | GO:0044282~small molecule catabolic process                                 |
|                       |                                                                             |
| Annotation Cluster 94 | Enrichment Score: 1.910404336447221                                         |
| Category              | Term                                                                        |
| GOTERM_BP_ALL         | GO:0042592~homeostatic process                                              |
| GOTERM_BP_ALL         | GO:0042391~regulation of membrane potential                                 |
| GOTERM_BP_ALL         | GO:0043269~regulation of ion transport                                      |
| GOTERM_BP_ALL         | GO:0034762~regulation of transmembrane transport                            |
| GOTERM_BP_ALL         | GO:0006811~ion transport                                                    |
| GOTERM_BP_ALL         | GO:0034220~ion transmembrane transport                                      |
| GOTERM_BP_ALL         | GO:0055085~transmembrane transport                                          |
| GOTERM_BP_ALL         | GO:0048878~chemical homeostasis                                             |
| GOTERM_BP_ALL         | GO:0006816~calcium ion transport                                            |
| GOTERM_BP_ALL         | GO:0034765~regulation of ion transmembrane transport                        |
| GOTERM_BP_ALL         | GO:0098660~inorganic ion transmembrane transport                            |
| GOTERM_BP_ALL         | GO:0019725~cellular homeostasis                                             |
| GOTERM_BP_ALL         | GO:0070838~divalent metal ion transport                                     |
| GOTERM_BP_ALL         | GO:0072511~divalent inorganic cation transport                              |
| GOTERM_BP_ALL         | GO:0006812~cation transport                                                 |
| GOTERM_BP_ALL         | GO:0098739~import across plasma membrane                                    |
| GOTERM_BP_ALL         | GO:0030001~metal ion transport                                              |



|                       |                                                                       |
|-----------------------|-----------------------------------------------------------------------|
| GOTERM_BP_ALL         | GO:1902656~calcium ion import into cytosol                            |
| GOTERM_BP_ALL         | GO:0097553~calcium ion transmembrane import into cytosol              |
| GOTERM_BP_ALL         | GO:0070509~calcium ion import                                         |
| GOTERM_BP_ALL         | GO:0098659~inorganic cation import into cell                          |
| GOTERM_BP_ALL         | GO:0099587~inorganic ion import into cell                             |
| GOTERM_BP_ALL         | GO:0043270~positive regulation of ion transport                       |
| GOTERM_BP_ALL         | GO:0055082~cellular chemical homeostasis                              |
| GOTERM_BP_ALL         | GO:0098703~calcium ion import across plasma membrane                  |
| GOTERM_BP_ALL         | GO:1990035~calcium ion import into cell                               |
| GOTERM_BP_ALL         | GO:0098657~import into cell                                           |
| GOTERM_BP_ALL         | GO:0060402~calcium ion transport into cytosol                         |
| GOTERM_BP_ALL         | GO:0051924~regulation of calcium ion transport                        |
| GOTERM_BP_ALL         | GO:0070588~calcium ion transmembrane transport                        |
| GOTERM_BP_ALL         | GO:0060401~cytosolic calcium ion transport                            |
| GOTERM_BP_ALL         | GO:0007204~positive regulation of cytosolic calcium ion concentration |
| GOTERM_BP_ALL         | GO:0098655~cation transmembrane transport                             |
| GOTERM_BP_ALL         | GO:1904062~regulation of cation transmembrane transport               |
| GOTERM_BP_ALL         | GO:0019226~transmission of nerve impulse                              |
| GOTERM_BP_ALL         | GO:0051480~regulation of cytosolic calcium ion concentration          |
| GOTERM_BP_ALL         | GO:0051928~positive regulation of calcium ion transport               |
| GOTERM_BP_ALL         | GO:0098662~inorganic cation transmembrane transport                   |
| GOTERM_BP_ALL         | GO:0086010~membrane depolarization during action potential            |
| GOTERM_BP_ALL         | GO:0051899~membrane depolarization                                    |
| GOTERM_BP_ALL         | GO:0019228~neuronal action potential                                  |
| GOTERM_BP_ALL         | GO:0035637~multicellular organismal signaling                         |
| GOTERM_BP_ALL         | GO:0010959~regulation of metal ion transport                          |
| GOTERM_BP_ALL         | GO:0030003~cellular cation homeostasis                                |
| GOTERM_BP_ALL         | GO:0006875~cellular metal ion homeostasis                             |
| GOTERM_BP_ALL         | GO:0050801~ion homeostasis                                            |
| GOTERM_BP_ALL         | GO:0006873~cellular ion homeostasis                                   |
| GOTERM_BP_ALL         | GO:0035725~sodium ion transmembrane transport                         |
| GOTERM_BP_ALL         | GO:0006874~cellular calcium ion homeostasis                           |
| GOTERM_BP_ALL         | GO:0015672~monovalent inorganic cation transport                      |
| GOTERM_BP_ALL         | GO:0055074~calcium ion homeostasis                                    |
| GOTERM_BP_ALL         | GO:0072503~cellular divalent inorganic cation homeostasis             |
| GOTERM_BP_ALL         | GO:0090279~regulation of calcium ion import                           |
| GOTERM_BP_ALL         | GO:0055080~cation homeostasis                                         |
| GOTERM_BP_ALL         | GO:0055065~metal ion homeostasis                                      |
| GOTERM_BP_ALL         | GO:0098771~inorganic ion homeostasis                                  |
| GOTERM_BP_ALL         | GO:0001508~action potential                                           |
| GOTERM_BP_ALL         | GO:0072507~divalent inorganic cation homeostasis                      |
| GOTERM_BP_ALL         | GO:0006814~sodium ion transport                                       |
| GOTERM_BP_ALL         | GO:1903169~regulation of calcium ion transmembrane transport          |
| GOTERM_BP_ALL         | GO:0010522~regulation of calcium ion transport into cytosol           |
| GOTERM_BP_ALL         | GO:0019722~calcium-mediated signaling                                 |
| GOTERM_BP_ALL         | GO:2000021~regulation of ion homeostasis                              |
|                       |                                                                       |
| Annotation Cluster 95 | Enrichment Score: 1.820487539376256                                   |
| Category              | Term                                                                  |
| GOTERM_BP_ALL         | GO:0010717~regulation of epithelial to mesenchymal transition         |
| GOTERM_BP_ALL         | GO:0001837~epithelial to mesenchymal transition                       |

|                       |                                                                                                           |
|-----------------------|-----------------------------------------------------------------------------------------------------------|
| GOTERM_BP_ALL         | GO:0044344~cellular response to fibroblast growth factor stimulus                                         |
| GOTERM_BP_ALL         | GO:0071774~response to fibroblast growth factor                                                           |
| GOTERM_BP_ALL         | GO:0008543~fibroblast growth factor receptor signaling pathway                                            |
|                       |                                                                                                           |
| Annotation Cluster 96 | Enrichment Score: 1.8147629252476964                                                                      |
| Category              | Term                                                                                                      |
| GOTERM_BP_ALL         | GO:0010038~response to metal ion                                                                          |
| GOTERM_BP_ALL         | GO:0051592~response to calcium ion                                                                        |
| GOTERM_BP_ALL         | GO:0071277~cellular response to calcium ion                                                               |
| GOTERM_BP_ALL         | GO:0071248~cellular response to metal ion                                                                 |
| GOTERM_BP_ALL         | GO:0071241~cellular response to inorganic substance                                                       |
|                       |                                                                                                           |
| Annotation Cluster 97 | Enrichment Score: 1.7922777826229757                                                                      |
| Category              | Term                                                                                                      |
| GOTERM_BP_ALL         | GO:0031647~regulation of protein stability                                                                |
| GOTERM_BP_ALL         | GO:0031329~regulation of cellular catabolic process                                                       |
| GOTERM_BP_ALL         | GO:0031396~regulation of protein ubiquitination                                                           |
| GOTERM_BP_ALL         | GO:0009894~regulation of catabolic process                                                                |
| GOTERM_BP_ALL         | GO:0031330~negative regulation of cellular catabolic process                                              |
| GOTERM_BP_ALL         | GO:1903320~regulation of protein modification by small protein conjugation or removal                     |
| GOTERM_BP_ALL         | GO:0009895~negative regulation of catabolic process                                                       |
| GOTERM_BP_ALL         | GO:2000058~regulation of protein ubiquitination involved in ubiquitin-dependent protein catabolic process |
| GOTERM_BP_ALL         | GO:0030162~regulation of proteolysis                                                                      |
| GOTERM_BP_ALL         | GO:1903051~negative regulation of proteolysis involved in cellular protein catabolic process              |
| GOTERM_BP_ALL         | GO:1903050~regulation of proteolysis involved in cellular protein catabolic process                       |
| GOTERM_BP_ALL         | GO:0050821~protein stabilization                                                                          |
| GOTERM_BP_ALL         | GO:0042787~protein ubiquitination involved in ubiquitin-dependent protein catabolic process               |
| GOTERM_BP_ALL         | GO:1903363~negative regulation of cellular protein catabolic process                                      |
| GOTERM_BP_ALL         | GO:0042176~regulation of protein catabolic process                                                        |
| GOTERM_BP_ALL         | GO:0042177~negative regulation of protein catabolic process                                               |
| GOTERM_BP_ALL         | GO:1903362~regulation of cellular protein catabolic process                                               |
| GOTERM_BP_ALL         | GO:0045861~negative regulation of proteolysis                                                             |
| GOTERM_BP_ALL         | GO:0006511~ubiquitin-dependent protein catabolic process                                                  |
| GOTERM_BP_ALL         | GO:0019941~modification-dependent protein catabolic process                                               |
| GOTERM_BP_ALL         | GO:0051438~regulation of ubiquitin-protein transferase activity                                           |
| GOTERM_BP_ALL         | GO:0043632~modification-dependent macromolecule catabolic process                                         |
| GOTERM_BP_ALL         | GO:0009896~positive regulation of catabolic process                                                       |
| GOTERM_BP_ALL         | GO:1903321~negative regulation of protein modification by small protein conjugation or removal            |
| GOTERM_BP_ALL         | GO:0032446~protein modification by small protein conjugation                                              |
| GOTERM_BP_ALL         | GO:0016567~protein ubiquitination                                                                         |
| GOTERM_BP_ALL         | GO:0051603~proteolysis involved in cellular protein catabolic process                                     |
| GOTERM_BP_ALL         | GO:0031331~positive regulation of cellular catabolic process                                              |
| GOTERM_BP_ALL         | GO:0032435~negative regulation of proteasomal ubiquitin-dependent protein catabolic process               |
| GOTERM_BP_ALL         | GO:0031398~positive regulation of protein ubiquitination                                                  |

|                       |                                                                                                            |
|-----------------------|------------------------------------------------------------------------------------------------------------|
| GOTERM_BP_ALL         | GO:0031397~negative regulation of protein ubiquitination                                                   |
| GOTERM_BP_ALL         | GO:0044257~cellular protein catabolic process                                                              |
| GOTERM_BP_ALL         | GO:0044248~cellular catabolic process                                                                      |
| GOTERM_BP_ALL         | GO:1903322~positive regulation of protein modification by small protein conjugation or removal             |
| GOTERM_BP_ALL         | GO:0043161~proteasome-mediated ubiquitin-dependent protein catabolic process                               |
| GOTERM_BP_ALL         | GO:0030163~protein catabolic process                                                                       |
| GOTERM_BP_ALL         | GO:1901799~negative regulation of proteasomal protein catabolic process                                    |
| GOTERM_BP_ALL         | GO:0070647~protein modification by small protein conjugation or removal                                    |
| GOTERM_BP_ALL         | GO:0006508~proteolysis                                                                                     |
| GOTERM_BP_ALL         | GO:0044265~cellular macromolecule catabolic process                                                        |
| GOTERM_BP_ALL         | GO:0010498~proteasomal protein catabolic process                                                           |
| GOTERM_BP_ALL         | GO:0009057~macromolecule catabolic process                                                                 |
| GOTERM_BP_ALL         | GO:0009056~catabolic process                                                                               |
| GOTERM_BP_ALL         | GO:0061136~regulation of proteasomal protein catabolic process                                             |
| GOTERM_BP_ALL         | GO:1901575~organic substance catabolic process                                                             |
| GOTERM_BP_ALL         | GO:0032434~regulation of proteasomal ubiquitin-dependent protein catabolic process                         |
| GOTERM_BP_ALL         | GO:0045732~positive regulation of protein catabolic process                                                |
| GOTERM_BP_ALL         | GO:0000209~protein polyubiquitination                                                                      |
|                       |                                                                                                            |
| Annotation Cluster 98 | Enrichment Score: 1.7866742572652332                                                                       |
| Category              | Term                                                                                                       |
| GOTERM_BP_ALL         | GO:0001889~liver development                                                                               |
| GOTERM_BP_ALL         | GO:0061008~hepaticobiliary system development                                                              |
| GOTERM_BP_ALL         | GO:0001824~blastocyst development                                                                          |
|                       |                                                                                                            |
| Annotation Cluster 99 | Enrichment Score: 1.7718513613362763                                                                       |
| Category              | Term                                                                                                       |
| GOTERM_BP_ALL         | GO:0070848~response to growth factor                                                                       |
| GOTERM_BP_ALL         | GO:0071363~cellular response to growth factor stimulus                                                     |
| GOTERM_BP_ALL         | GO:0090287~regulation of cellular response to growth factor stimulus                                       |
| GOTERM_BP_ALL         | GO:0007167~enzyme linked receptor protein signaling pathway                                                |
| GOTERM_BP_ALL         | GO:0017015~regulation of transforming growth factor beta receptor signaling pathway                        |
| GOTERM_BP_ALL         | GO:1903844~regulation of cellular response to transforming growth factor beta stimulus                     |
| GOTERM_BP_ALL         | GO:0071560~cellular response to transforming growth factor beta stimulus                                   |
| GOTERM_BP_ALL         | GO:0071559~response to transforming growth factor beta                                                     |
| GOTERM_BP_ALL         | GO:0090092~regulation of transmembrane receptor protein serine/threonine kinase signaling pathway          |
| GOTERM_BP_ALL         | GO:0090288~negative regulation of cellular response to growth factor stimulus                              |
| GOTERM_BP_ALL         | GO:0007178~transmembrane receptor protein serine/threonine kinase signaling pathway                        |
| GOTERM_BP_ALL         | GO:0090100~positive regulation of transmembrane receptor protein serine/threonine kinase signaling pathway |
| GOTERM_BP_ALL         | GO:0007179~transforming growth factor beta receptor signaling pathway                                      |
| GOTERM_BP_ALL         | GO:0030512~negative regulation of transforming growth factor beta receptor signaling pathway               |

|                        |                                                                                                            |
|------------------------|------------------------------------------------------------------------------------------------------------|
| GOTERM_BP_ALL          | GO:1903845~negative regulation of cellular response to transforming growth factor beta stimulus            |
| GOTERM_BP_ALL          | GO:0090101~negative regulation of transmembrane receptor protein serine/threonine kinase signaling pathway |
| Annotation Cluster 100 | Enrichment Score: 1.7502768762184833                                                                       |
| Category               | Term                                                                                                       |
| GOTERM_BP_ALL          | GO:1901796~regulation of signal transduction by p53 class mediator                                         |
| GOTERM_BP_ALL          | GO:0043516~regulation of DNA damage response, signal transduction by p53 class mediator                    |
| GOTERM_BP_ALL          | GO:0051053~negative regulation of DNA metabolic process                                                    |
| GOTERM_BP_ALL          | GO:0072331~signal transduction by p53 class mediator                                                       |
| GOTERM_BP_ALL          | GO:1902253~regulation of intrinsic apoptotic signaling pathway by p53 class mediator                       |
| GOTERM_BP_ALL          | GO:0030330~DNA damage response, signal transduction by p53 class mediator                                  |
| GOTERM_BP_ALL          | GO:0072332~intrinsic apoptotic signaling pathway by p53 class mediator                                     |
| GOTERM_BP_ALL          | GO:0042770~signal transduction in response to DNA damage                                                   |
| Annotation Cluster 101 | Enrichment Score: 1.7412291660892067                                                                       |
| Category               | Term                                                                                                       |
| GOTERM_BP_ALL          | GO:0007097~nuclear migration                                                                               |
| GOTERM_BP_ALL          | GO:0040023~establishment of nucleus localization                                                           |
| GOTERM_BP_ALL          | GO:0051647~nucleus localization                                                                            |
| Annotation Cluster 102 | Enrichment Score: 1.7399214424649845                                                                       |
| Category               | Term                                                                                                       |
| GOTERM_BP_ALL          | GO:0060348~bone development                                                                                |
| GOTERM_BP_ALL          | GO:0060349~bone morphogenesis                                                                              |
| GOTERM_BP_ALL          | GO:0031214~biomineral tissue development                                                                   |
| Annotation Cluster 103 | Enrichment Score: 1.7349505039219226                                                                       |
| Category               | Term                                                                                                       |
| GOTERM_BP_ALL          | GO:0010769~regulation of cell morphogenesis involved in differentiation                                    |
| GOTERM_BP_ALL          | GO:0022604~regulation of cell morphogenesis                                                                |
| GOTERM_BP_ALL          | GO:0050770~regulation of axonogenesis                                                                      |
| GOTERM_BP_ALL          | GO:0010770~positive regulation of cell morphogenesis involved in differentiation                           |
| GOTERM_BP_ALL          | GO:0048639~positive regulation of developmental growth                                                     |
| GOTERM_BP_ALL          | GO:0048588~developmental cell growth                                                                       |
| GOTERM_BP_ALL          | GO:0031346~positive regulation of cell projection organization                                             |
| GOTERM_BP_ALL          | GO:0060560~developmental growth involved in morphogenesis                                                  |
| GOTERM_BP_ALL          | GO:0008361~regulation of cell size                                                                         |
| GOTERM_BP_ALL          | GO:0050772~positive regulation of axonogenesis                                                             |
| GOTERM_BP_ALL          | GO:0045773~positive regulation of axon extension                                                           |
| GOTERM_BP_ALL          | GO:1990138~neuron projection extension                                                                     |
| GOTERM_BP_ALL          | GO:0090066~regulation of anatomical structure size                                                         |
| GOTERM_BP_ALL          | GO:0010976~positive regulation of neuron projection development                                            |
| GOTERM_BP_ALL          | GO:0030516~regulation of axon extension                                                                    |
| GOTERM_BP_ALL          | GO:0061387~regulation of extent of cell growth                                                             |
| GOTERM_BP_ALL          | GO:0048675~axon extension                                                                                  |

|                        |                                                                                  |
|------------------------|----------------------------------------------------------------------------------|
| GOTERM_BP_ALL          | GO:0032535~regulation of cellular component size                                 |
|                        |                                                                                  |
| Annotation Cluster 104 | Enrichment Score: 1.6870177963093773                                             |
| Category               | Term                                                                             |
| GOTERM_BP_ALL          | GO:0070507~regulation of microtubule cytoskeleton organization                   |
| GOTERM_BP_ALL          | GO:0032886~regulation of microtubule-based process                               |
| GOTERM_BP_ALL          | GO:0051493~regulation of cytoskeleton organization                               |
| GOTERM_BP_ALL          | GO:0031109~microtubule polymerization or depolymerization                        |
| GOTERM_BP_ALL          | GO:0031110~regulation of microtubule polymerization or depolymerization          |
| GOTERM_BP_ALL          | GO:0007017~microtubule-based process                                             |
| GOTERM_BP_ALL          | GO:0000226~microtubule cytoskeleton organization                                 |
| GOTERM_BP_ALL          | GO:1902903~regulation of supramolecular fiber organization                       |
| GOTERM_BP_ALL          | GO:0031112~positive regulation of microtubule polymerization or depolymerization |
| GOTERM_BP_ALL          | GO:0007051~spindle organization                                                  |
| GOTERM_BP_ALL          | GO:1902905~positive regulation of supramolecular fiber organization              |
| GOTERM_BP_ALL          | GO:0051495~positive regulation of cytoskeleton organization                      |
|                        |                                                                                  |
| Annotation Cluster 105 | Enrichment Score: 1.6571052173942102                                             |
| Category               | Term                                                                             |
| GOTERM_BP_ALL          | GO:0043535~regulation of blood vessel endothelial cell migration                 |
| GOTERM_BP_ALL          | GO:0043534~blood vessel endothelial cell migration                               |
| GOTERM_BP_ALL          | GO:0001936~regulation of endothelial cell proliferation                          |
| GOTERM_BP_ALL          | GO:0101023~vascular endothelial cell proliferation                               |
| GOTERM_BP_ALL          | GO:0001935~endothelial cell proliferation                                        |
| GOTERM_BP_ALL          | GO:1905562~regulation of vascular endothelial cell proliferation                 |
| GOTERM_BP_ALL          | GO:0001938~positive regulation of endothelial cell proliferation                 |
| GOTERM_BP_ALL          | GO:1905564~positive regulation of vascular endothelial cell proliferation        |
| GOTERM_BP_ALL          | GO:0043536~positive regulation of blood vessel endothelial cell migration        |
| GOTERM_BP_ALL          | GO:0001937~negative regulation of endothelial cell proliferation                 |
| GOTERM_BP_ALL          | GO:0001892~embryonic placenta development                                        |
| GOTERM_BP_ALL          | GO:0001890~placenta development                                                  |
| GOTERM_BP_ALL          | GO:0043405~regulation of MAP kinase activity                                     |
|                        |                                                                                  |
| Annotation Cluster 106 | Enrichment Score: 1.6435145855843323                                             |
| Category               | Term                                                                             |
| GOTERM_BP_ALL          | GO:0007548~sex differentiation                                                   |
| GOTERM_BP_ALL          | GO:0046661~male sex differentiation                                              |
| GOTERM_BP_ALL          | GO:0008406~gonad development                                                     |
| GOTERM_BP_ALL          | GO:0045137~development of primary sexual characteristics                         |
| GOTERM_BP_ALL          | GO:0046660~female sex differentiation                                            |
| GOTERM_BP_ALL          | GO:0030522~intracellular receptor signaling pathway                              |
| GOTERM_BP_ALL          | GO:0009566~fertilization                                                         |
| GOTERM_BP_ALL          | GO:0008584~male gonad development                                                |
| GOTERM_BP_ALL          | GO:0046546~development of primary male sexual characteristics                    |
| GOTERM_BP_ALL          | GO:0008585~female gonad development                                              |
| GOTERM_BP_ALL          | GO:0042698~ovulation cycle                                                       |
| GOTERM_BP_ALL          | GO:0046545~development of primary female sexual characteristics                  |
| GOTERM_BP_ALL          | GO:0022602~ovulation cycle process                                               |
|                        |                                                                                  |
| Annotation Cluster 107 | Enrichment Score: 1.6365068421070934                                             |

|                        |                                                                                        |
|------------------------|----------------------------------------------------------------------------------------|
| Category               | Term                                                                                   |
| GOTERM_BP_ALL          | GO:0030316~osteoclast differentiation                                                  |
| GOTERM_BP_ALL          | GO:0008544~epidermis development                                                       |
| GOTERM_BP_ALL          | GO:0009913~epidermal cell differentiation                                              |
|                        |                                                                                        |
| Annotation Cluster 108 | Enrichment Score: 1.6104218440073748                                                   |
| Category               | Term                                                                                   |
| GOTERM_BP_ALL          | GO:0002366~leukocyte activation involved in immune response                            |
| GOTERM_BP_ALL          | GO:0002263~cell activation involved in immune response                                 |
| GOTERM_BP_ALL          | GO:0010595~positive regulation of endothelial cell migration                           |
| GOTERM_BP_ALL          | GO:0010634~positive regulation of epithelial cell migration                            |
| GOTERM_BP_ALL          | GO:0042093~T-helper cell differentiation                                               |
| GOTERM_BP_ALL          | GO:0046632~alpha-beta T cell differentiation                                           |
| GOTERM_BP_ALL          | GO:0046631~alpha-beta T cell activation                                                |
| GOTERM_BP_ALL          | GO:0002286~T cell activation involved in immune response                               |
| GOTERM_BP_ALL          | GO:0002294~CD4-positive, alpha-beta T cell differentiation involved in immune response |
| GOTERM_BP_ALL          | GO:0002287~alpha-beta T cell activation involved in immune response                    |
| GOTERM_BP_ALL          | GO:0002293~alpha-beta T cell differentiation involved in immune response               |
| GOTERM_BP_ALL          | GO:0002292~T cell differentiation involved in immune response                          |
| GOTERM_BP_ALL          | GO:0002285~lymphocyte activation involved in immune response                           |
| GOTERM_BP_ALL          | GO:0043367~CD4-positive, alpha-beta T cell differentiation                             |
| GOTERM_BP_ALL          | GO:0035710~CD4-positive, alpha-beta T cell activation                                  |
| GOTERM_BP_ALL          | GO:0034612~response to tumor necrosis factor                                           |
| GOTERM_BP_ALL          | GO:0071356~cellular response to tumor necrosis factor                                  |
| GOTERM_BP_ALL          | GO:0001819~positive regulation of cytokine production                                  |
|                        |                                                                                        |
| Annotation Cluster 109 | Enrichment Score: 1.598048371976269                                                    |
| Category               | Term                                                                                   |
| GOTERM_BP_ALL          | GO:0016202~regulation of striated muscle tissue development                            |
| GOTERM_BP_ALL          | GO:0051147~regulation of muscle cell differentiation                                   |
| GOTERM_BP_ALL          | GO:0048634~regulation of muscle organ development                                      |
| GOTERM_BP_ALL          | GO:1901861~regulation of muscle tissue development                                     |
| GOTERM_BP_ALL          | GO:0048638~regulation of developmental growth                                          |
| GOTERM_BP_ALL          | GO:0051148~negative regulation of muscle cell differentiation                          |
| GOTERM_BP_ALL          | GO:1901862~negative regulation of muscle tissue development                            |
| GOTERM_BP_ALL          | GO:0035051~cardiocyte differentiation                                                  |
| GOTERM_BP_ALL          | GO:0035265~organ growth                                                                |
| GOTERM_BP_ALL          | GO:0048738~cardiac muscle tissue development                                           |
| GOTERM_BP_ALL          | GO:2000106~regulation of leukocyte apoptotic process                                   |
| GOTERM_BP_ALL          | GO:0046620~regulation of organ growth                                                  |
| GOTERM_BP_ALL          | GO:0045843~negative regulation of striated muscle tissue development                   |
| GOTERM_BP_ALL          | GO:0048635~negative regulation of muscle organ development                             |
| GOTERM_BP_ALL          | GO:0055021~regulation of cardiac muscle tissue growth                                  |
| GOTERM_BP_ALL          | GO:0055007~cardiac muscle cell differentiation                                         |
| GOTERM_BP_ALL          | GO:0055022~negative regulation of cardiac muscle tissue growth                         |
| GOTERM_BP_ALL          | GO:0061117~negative regulation of heart growth                                         |
| GOTERM_BP_ALL          | GO:0071887~leukocyte apoptotic process                                                 |
| GOTERM_BP_ALL          | GO:0060420~regulation of heart growth                                                  |
| GOTERM_BP_ALL          | GO:0045926~negative regulation of growth                                               |
| GOTERM_BP_ALL          | GO:2000108~positive regulation of leukocyte apoptotic process                          |

|                        |                                                                           |
|------------------------|---------------------------------------------------------------------------|
| GOTERM_BP_ALL          | GO:0033032~regulation of myeloid cell apoptotic process                   |
| GOTERM_BP_ALL          | GO:0046621~negative regulation of organ growth                            |
| GOTERM_BP_ALL          | GO:0055024~regulation of cardiac muscle tissue development                |
| GOTERM_BP_ALL          | GO:0055017~cardiac muscle tissue growth                                   |
| GOTERM_BP_ALL          | GO:0055026~negative regulation of cardiac muscle tissue development       |
| GOTERM_BP_ALL          | GO:2000725~regulation of cardiac muscle cell differentiation              |
| GOTERM_BP_ALL          | GO:0060419~heart growth                                                   |
| GOTERM_BP_ALL          | GO:0048660~regulation of smooth muscle cell proliferation                 |
| GOTERM_BP_ALL          | GO:0051153~regulation of striated muscle cell differentiation             |
| GOTERM_BP_ALL          | GO:1905207~regulation of cardiocyte differentiation                       |
| GOTERM_BP_ALL          | GO:0070228~regulation of lymphocyte apoptotic process                     |
| GOTERM_BP_ALL          | GO:0014855~striated muscle cell proliferation                             |
| GOTERM_BP_ALL          | GO:0033002~muscle cell proliferation                                      |
| GOTERM_BP_ALL          | GO:0070227~lymphocyte apoptotic process                                   |
| GOTERM_BP_ALL          | GO:0048659~smooth muscle cell proliferation                               |
| GOTERM_BP_ALL          | GO:1904705~regulation of vascular smooth muscle cell proliferation        |
| GOTERM_BP_ALL          | GO:1990874~vascular smooth muscle cell proliferation                      |
| GOTERM_BP_ALL          | GO:0048640~negative regulation of developmental growth                    |
|                        |                                                                           |
| Annotation Cluster 110 | Enrichment Score: 1.577021468162972                                       |
| Category               | Term                                                                      |
| GOTERM_BP_ALL          | GO:0001824~blastocyst development                                         |
| GOTERM_BP_ALL          | GO:0001835~blastocyst hatching                                            |
| GOTERM_BP_ALL          | GO:0071684~organism emergence from protective structure                   |
| GOTERM_BP_ALL          | GO:0035188~hatching                                                       |
|                        |                                                                           |
| Annotation Cluster 111 | Enrichment Score: 1.5464086022283383                                      |
| Category               | Term                                                                      |
| GOTERM_BP_ALL          | GO:0002366~leukocyte activation involved in immune response               |
| GOTERM_BP_ALL          | GO:0002263~cell activation involved in immune response                    |
| GOTERM_BP_ALL          | GO:0045055~regulated exocytosis                                           |
| GOTERM_BP_ALL          | GO:0006887~exocytosis                                                     |
| GOTERM_BP_ALL          | GO:1903305~regulation of regulated secretory pathway                      |
| GOTERM_BP_ALL          | GO:0043299~leukocyte degranulation                                        |
| GOTERM_BP_ALL          | GO:0043303~mast cell degranulation                                        |
| GOTERM_BP_ALL          | GO:0002448~mast cell mediated immunity                                    |
| GOTERM_BP_ALL          | GO:0002275~myeloid cell activation involved in immune response            |
| GOTERM_BP_ALL          | GO:0002279~mast cell activation involved in immune response               |
| GOTERM_BP_ALL          | GO:0002444~myeloid leukocyte mediated immunity                            |
| GOTERM_BP_ALL          | GO:0002274~myeloid leukocyte activation                                   |
| GOTERM_BP_ALL          | GO:0045576~mast cell activation                                           |
| GOTERM_BP_ALL          | GO:0043304~regulation of mast cell degranulation                          |
| GOTERM_BP_ALL          | GO:0032418~lysosome localization                                          |
| GOTERM_BP_ALL          | GO:0033006~regulation of mast cell activation involved in immune response |
| GOTERM_BP_ALL          | GO:0002252~immune effector process                                        |
| GOTERM_BP_ALL          | GO:0033003~regulation of mast cell activation                             |
| GOTERM_BP_ALL          | GO:0043300~regulation of leukocyte degranulation                          |
| GOTERM_BP_ALL          | GO:0002703~regulation of leukocyte mediated immunity                      |
| GOTERM_BP_ALL          | GO:0002443~leukocyte mediated immunity                                    |
| GOTERM_BP_ALL          | GO:0002886~regulation of myeloid leukocyte mediated immunity              |
| GOTERM_BP_ALL          | GO:0050776~regulation of immune response                                  |

|                        |                                                                                     |
|------------------------|-------------------------------------------------------------------------------------|
| GOTERM_BP_ALL          | GO:0002697~regulation of immune effector process                                    |
| GOTERM_BP_ALL          | GO:0002705~positive regulation of leukocyte mediated immunity                       |
| GOTERM_BP_ALL          | GO:0050778~positive regulation of immune response                                   |
| GOTERM_BP_ALL          | GO:0002699~positive regulation of immune effector process                           |
| GOTERM_BP_ALL          | GO:0006955~immune response                                                          |
|                        |                                                                                     |
| Annotation Cluster 112 | Enrichment Score: 1.5334299524846815                                                |
| Category               | Term                                                                                |
| GOTERM_BP_ALL          | GO:1903827~regulation of cellular protein localization                              |
| GOTERM_BP_ALL          | GO:0032880~regulation of protein localization                                       |
| GOTERM_BP_ALL          | GO:1903829~positive regulation of cellular protein localization                     |
| GOTERM_BP_ALL          | GO:1904951~positive regulation of establishment of protein localization             |
| GOTERM_BP_ALL          | GO:0090087~regulation of peptide transport                                          |
| GOTERM_BP_ALL          | GO:0070201~regulation of establishment of protein localization                      |
| GOTERM_BP_ALL          | GO:0051222~positive regulation of protein transport                                 |
| GOTERM_BP_ALL          | GO:0051223~regulation of protein transport                                          |
| GOTERM_BP_ALL          | GO:0002791~regulation of peptide secretion                                          |
| GOTERM_BP_ALL          | GO:0090316~positive regulation of intracellular protein transport                   |
| GOTERM_BP_ALL          | GO:0050708~regulation of protein secretion                                          |
| GOTERM_BP_ALL          | GO:0033157~regulation of intracellular protein transport                            |
| GOTERM_BP_ALL          | GO:1903533~regulation of protein targeting                                          |
|                        |                                                                                     |
| Annotation Cluster 113 | Enrichment Score: 1.497911234230321                                                 |
| Category               | Term                                                                                |
| GOTERM_BP_ALL          | GO:0051216~cartilage development                                                    |
| GOTERM_BP_ALL          | GO:0036075~replacement ossification                                                 |
| GOTERM_BP_ALL          | GO:0001958~endochondral ossification                                                |
| GOTERM_BP_ALL          | GO:0060349~bone morphogenesis                                                       |
| GOTERM_BP_ALL          | GO:0060350~endochondral bone morphogenesis                                          |
|                        |                                                                                     |
| Annotation Cluster 114 | Enrichment Score: 1.460966237532247                                                 |
| Category               | Term                                                                                |
| GOTERM_BP_ALL          | GO:0007017~microtubule-based process                                                |
| GOTERM_BP_ALL          | GO:0010970~transport along microtubule                                              |
| GOTERM_BP_ALL          | GO:0099111~microtubule-based transport                                              |
| GOTERM_BP_ALL          | GO:0008088~axo-dendritic transport                                                  |
| GOTERM_BP_ALL          | GO:0030705~cytoskeleton-dependent intracellular transport                           |
| GOTERM_BP_ALL          | GO:0072384~organelle transport along microtubule                                    |
| GOTERM_BP_ALL          | GO:0007018~microtubule-based movement                                               |
|                        |                                                                                     |
| Annotation Cluster 115 | Enrichment Score: 1.4274943464718395                                                |
| Category               | Term                                                                                |
| GOTERM_BP_ALL          | GO:2001236~regulation of extrinsic apoptotic signaling pathway                      |
| GOTERM_BP_ALL          | GO:0097191~extrinsic apoptotic signaling pathway                                    |
| GOTERM_BP_ALL          | GO:2001237~negative regulation of extrinsic apoptotic signaling pathway             |
| GOTERM_BP_ALL          | GO:2001239~regulation of extrinsic apoptotic signaling pathway in absence of ligand |
| GOTERM_BP_ALL          | GO:0008625~extrinsic apoptotic signaling pathway via death domain receptors         |
|                        |                                                                                     |
| Annotation Cluster 116 | Enrichment Score: 1.385646436321252                                                 |



| Category               | Term                                                         |
|------------------------|--------------------------------------------------------------|
| GOTERM_BP_ALL          | GO:0035051~cardiocyte differentiation                        |
| GOTERM_BP_ALL          | GO:0055002~striated muscle cell development                  |
| GOTERM_BP_ALL          | GO:0048738~cardiac muscle tissue development                 |
| GOTERM_BP_ALL          | GO:0055001~muscle cell development                           |
| GOTERM_BP_ALL          | GO:0032204~regulation of telomere maintenance                |
| GOTERM_BP_ALL          | GO:0010611~regulation of cardiac muscle hypertrophy          |
| GOTERM_BP_ALL          | GO:0055021~regulation of cardiac muscle tissue growth        |
| GOTERM_BP_ALL          | GO:0043500~muscle adaptation                                 |
| GOTERM_BP_ALL          | GO:0014743~regulation of muscle hypertrophy                  |
| GOTERM_BP_ALL          | GO:0055007~cardiac muscle cell differentiation               |
| GOTERM_BP_ALL          | GO:0060420~regulation of heart growth                        |
| GOTERM_BP_ALL          | GO:0010614~negative regulation of cardiac muscle hypertrophy |
| GOTERM_BP_ALL          | GO:0055013~cardiac muscle cell development                   |
| GOTERM_BP_ALL          | GO:0014741~negative regulation of muscle hypertrophy         |
| GOTERM_BP_ALL          | GO:0055024~regulation of cardiac muscle tissue development   |
| GOTERM_BP_ALL          | GO:0055006~cardiac cell development                          |
| GOTERM_BP_ALL          | GO:0055017~cardiac muscle tissue growth                      |
| GOTERM_BP_ALL          | GO:0043502~regulation of muscle adaptation                   |
| GOTERM_BP_ALL          | GO:0003300~cardiac muscle hypertrophy                        |
| GOTERM_BP_ALL          | GO:0060419~heart growth                                      |
| GOTERM_BP_ALL          | GO:0014897~striated muscle hypertrophy                       |
| GOTERM_BP_ALL          | GO:0014896~muscle hypertrophy                                |
| GOTERM_BP_ALL          | GO:0014888~striated muscle adaptation                        |
| GOTERM_BP_ALL          | GO:0044057~regulation of system process                      |
| GOTERM_BP_ALL          | GO:0003012~muscle system process                             |
| GOTERM_BP_ALL          | GO:0090257~regulation of muscle system process               |
|                        |                                                              |
| Annotation Cluster 117 | Enrichment Score: 1.377385045820297                          |
| Category               | Term                                                         |
| GOTERM_BP_ALL          | GO:0045580~regulation of T cell differentiation              |
| GOTERM_BP_ALL          | GO:0045619~regulation of lymphocyte differentiation          |
| GOTERM_BP_ALL          | GO:0046632~alpha-beta T cell differentiation                 |
| GOTERM_BP_ALL          | GO:0046631~alpha-beta T cell activation                      |
| GOTERM_BP_ALL          | GO:0046637~regulation of alpha-beta T cell differentiation   |
| GOTERM_BP_ALL          | GO:0046634~regulation of alpha-beta T cell activation        |
|                        |                                                              |
| Annotation Cluster 118 | Enrichment Score: 1.3120754978819988                         |
| Category               | Term                                                         |
| GOTERM_BP_ALL          | GO:0002065~columnar/cuboidal epithelial cell differentiation |
| GOTERM_BP_ALL          | GO:0002067~glandular epithelial cell differentiation         |
| GOTERM_BP_ALL          | GO:0002066~columnar/cuboidal epithelial cell development     |
| GOTERM_BP_ALL          | GO:0002064~epithelial cell development                       |
|                        |                                                              |
| Annotation Cluster 119 | Enrichment Score: 1.305195674204711                          |
| Category               | Term                                                         |
| GOTERM_BP_ALL          | GO:0010810~regulation of cell-substrate adhesion             |
| GOTERM_BP_ALL          | GO:0031589~cell-substrate adhesion                           |
| GOTERM_BP_ALL          | GO:0010812~negative regulation of cell-substrate adhesion    |
| GOTERM_BP_ALL          | GO:0001952~regulation of cell-matrix adhesion                |
| GOTERM_BP_ALL          | GO:0001953~negative regulation of cell-matrix adhesion       |

|                        |                                                                                                         |
|------------------------|---------------------------------------------------------------------------------------------------------|
| GOTERM_BP_ALL          | GO:0007160~cell-matrix adhesion                                                                         |
| GOTERM_BP_ALL          | GO:0007162~negative regulation of cell adhesion                                                         |
| GOTERM_BP_ALL          | GO:0061041~regulation of wound healing                                                                  |
| GOTERM_BP_ALL          | GO:1903034~regulation of response to wounding                                                           |
|                        |                                                                                                         |
| Annotation Cluster 120 | Enrichment Score: 1.2949675632437572                                                                    |
| Category               | Term                                                                                                    |
| GOTERM_BP_ALL          | GO:0097193~intrinsic apoptotic signaling pathway                                                        |
| GOTERM_BP_ALL          | GO:2001242~regulation of intrinsic apoptotic signaling pathway                                          |
| GOTERM_BP_ALL          | GO:2001235~positive regulation of apoptotic signaling pathway                                           |
| GOTERM_BP_ALL          | GO:1903146~regulation of mitophagy                                                                      |
| GOTERM_BP_ALL          | GO:0010821~regulation of mitochondrion organization                                                     |
| GOTERM_BP_ALL          | GO:2001244~positive regulation of intrinsic apoptotic signaling pathway                                 |
| GOTERM_BP_ALL          | GO:0008637~apoptotic mitochondrial changes                                                              |
| GOTERM_BP_ALL          | GO:0010822~positive regulation of mitochondrion organization                                            |
| GOTERM_BP_ALL          | GO:0090199~regulation of release of cytochrome c from mitochondria                                      |
|                        | GO:1902108~regulation of mitochondrial membrane permeability involved in apoptotic process              |
| GOTERM_BP_ALL          | GO:0001836~release of cytochrome c from mitochondria                                                    |
| GOTERM_BP_ALL          | GO:0046902~regulation of mitochondrial membrane permeability                                            |
| GOTERM_BP_ALL          | GO:0070585~protein localization to mitochondrion                                                        |
| GOTERM_BP_ALL          | GO:0007005~mitochondrion organization                                                                   |
| GOTERM_BP_ALL          | GO:0090559~regulation of membrane permeability                                                          |
| GOTERM_BP_ALL          | GO:0072655~establishment of protein localization to mitochondrion                                       |
| GOTERM_BP_ALL          | GO:0007006~mitochondrial membrane organization                                                          |
| GOTERM_BP_ALL          | GO:0006839~mitochondrial transport                                                                      |
|                        |                                                                                                         |
| Annotation Cluster 121 | Enrichment Score: 1.2797351371128125                                                                    |
| Category               | Term                                                                                                    |
| GOTERM_BP_ALL          | GO:0045739~positive regulation of DNA repair                                                            |
| GOTERM_BP_ALL          | GO:2001022~positive regulation of response to DNA damage stimulus                                       |
| GOTERM_BP_ALL          | GO:0016444~somatic cell DNA recombination                                                               |
|                        | GO:0002562~somatic diversification of immune receptors via germline recombination within a single locus |
| GOTERM_BP_ALL          | GO:0002200~somatic diversification of immune receptors                                                  |
| GOTERM_BP_ALL          | GO:0006310~DNA recombination                                                                            |
| GOTERM_BP_ALL          | GO:0000724~double-strand break repair via homologous recombination                                      |
| GOTERM_BP_ALL          | GO:0000725~recombinational repair                                                                       |
|                        |                                                                                                         |
| Annotation Cluster 122 | Enrichment Score: 1.2781425643995248                                                                    |
| Category               | Term                                                                                                    |
| GOTERM_BP_ALL          | GO:0061024~membrane organization                                                                        |
| GOTERM_BP_ALL          | GO:0044802~single-organism membrane organization                                                        |
| GOTERM_BP_ALL          | GO:0010256~endomembrane system organization                                                             |
| GOTERM_BP_ALL          | GO:1990778~protein localization to cell periphery                                                       |
| GOTERM_BP_ALL          | GO:0007009~plasma membrane organization                                                                 |
| GOTERM_BP_ALL          | GO:0072657~protein localization to membrane                                                             |
| GOTERM_BP_ALL          | GO:0072659~protein localization to plasma membrane                                                      |
|                        |                                                                                                         |
| Annotation Cluster 123 | Enrichment Score: 1.2781062911232908                                                                    |
| Category               | Term                                                                                                    |

|                        |                                                                |
|------------------------|----------------------------------------------------------------|
| GOTERM_BP_ALL          | GO:0010810~regulation of cell-substrate adhesion               |
| GOTERM_BP_ALL          | GO:0097435~supramolecular fiber organization                   |
| GOTERM_BP_ALL          | GO:0051493~regulation of cytoskeleton organization             |
| GOTERM_BP_ALL          | GO:0001738~morphogenesis of a polarized epithelium             |
| GOTERM_BP_ALL          | GO:0007010~cytoskeleton organization                           |
| GOTERM_BP_ALL          | GO:0030100~regulation of endocytosis                           |
| GOTERM_BP_ALL          | GO:0031589~cell-substrate adhesion                             |
| GOTERM_BP_ALL          | GO:0034332~adherens junction organization                      |
| GOTERM_BP_ALL          | GO:0030029~actin filament-based process                        |
| GOTERM_BP_ALL          | GO:0001952~regulation of cell-matrix adhesion                  |
| GOTERM_BP_ALL          | GO:0034333~adherens junction assembly                          |
| GOTERM_BP_ALL          | GO:0030036~actin cytoskeleton organization                     |
| GOTERM_BP_ALL          | GO:0051017~actin filament bundle assembly                      |
| GOTERM_BP_ALL          | GO:0061572~actin filament bundle organization                  |
| GOTERM_BP_ALL          | GO:0007160~cell-matrix adhesion                                |
| GOTERM_BP_ALL          | GO:0032231~regulation of actin filament bundle assembly        |
| GOTERM_BP_ALL          | GO:0034329~cell junction assembly                              |
| GOTERM_BP_ALL          | GO:0031032~actomyosin structure organization                   |
| GOTERM_BP_ALL          | GO:0045216~cell-cell junction organization                     |
| GOTERM_BP_ALL          | GO:0048259~regulation of receptor-mediated endocytosis         |
| GOTERM_BP_ALL          | GO:0051893~regulation of focal adhesion assembly               |
| GOTERM_BP_ALL          | GO:0090109~regulation of cell-substrate junction assembly      |
| GOTERM_BP_ALL          | GO:1903391~regulation of adherens junction organization        |
| GOTERM_BP_ALL          | GO:0034330~cell junction organization                          |
| GOTERM_BP_ALL          | GO:0032956~regulation of actin cytoskeleton organization       |
| GOTERM_BP_ALL          | GO:0032970~regulation of actin filament-based process          |
| GOTERM_BP_ALL          | GO:0051492~regulation of stress fiber assembly                 |
| GOTERM_BP_ALL          | GO:0007044~cell-substrate junction assembly                    |
| GOTERM_BP_ALL          | GO:0030038~contractile actin filament bundle assembly          |
| GOTERM_BP_ALL          | GO:0043149~stress fiber assembly                               |
| GOTERM_BP_ALL          | GO:1901888~regulation of cell junction assembly                |
| GOTERM_BP_ALL          | GO:0007015~actin filament organization                         |
| GOTERM_BP_ALL          | GO:0007266~Rho protein signal transduction                     |
|                        |                                                                |
| Annotation Cluster 124 | Enrichment Score: 1.2747205124345435                           |
| Category               | Term                                                           |
| GOTERM_BP_ALL          | GO:0043491~protein kinase B signaling                          |
| GOTERM_BP_ALL          | GO:0051896~regulation of protein kinase B signaling            |
| GOTERM_BP_ALL          | GO:0032869~cellular response to insulin stimulus               |
| GOTERM_BP_ALL          | GO:0046626~regulation of insulin receptor signaling pathway    |
| GOTERM_BP_ALL          | GO:1900076~regulation of cellular response to insulin stimulus |
| GOTERM_BP_ALL          | GO:0008286~insulin receptor signaling pathway                  |
|                        |                                                                |
| Annotation Cluster 125 | Enrichment Score: 1.2717630763930527                           |
| Category               | Term                                                           |
| GOTERM_BP_ALL          | GO:0001704~formation of primary germ layer                     |
| GOTERM_BP_ALL          | GO:0007498~mesoderm development                                |
| GOTERM_BP_ALL          | GO:0001707~mesoderm formation                                  |
| GOTERM_BP_ALL          | GO:0048332~mesoderm morphogenesis                              |
|                        |                                                                |
| Annotation Cluster 126 | Enrichment Score: 1.262098971441987                            |

|                        |                                                                         |
|------------------------|-------------------------------------------------------------------------|
| Category               | Term                                                                    |
| GOTERM_BP_ALL          | GO:0071214~cellular response to abiotic stimulus                        |
| GOTERM_BP_ALL          | GO:0034644~cellular response to UV                                      |
| GOTERM_BP_ALL          | GO:0071478~cellular response to radiation                               |
| GOTERM_BP_ALL          | GO:0071482~cellular response to light stimulus                          |
| GOTERM_BP_ALL          | GO:0009411~response to UV                                               |
|                        |                                                                         |
| Annotation Cluster 127 | Enrichment Score: 1.2467540115696671                                    |
| Category               | Term                                                                    |
| GOTERM_BP_ALL          | GO:2000045~regulation of G1/S transition of mitotic cell cycle          |
| GOTERM_BP_ALL          | GO:0000082~G1/S transition of mitotic cell cycle                        |
| GOTERM_BP_ALL          | GO:1902807~negative regulation of cell cycle G1/S phase transition      |
| GOTERM_BP_ALL          | GO:0045786~negative regulation of cell cycle                            |
| GOTERM_BP_ALL          | GO:0045930~negative regulation of mitotic cell cycle                    |
| GOTERM_BP_ALL          | GO:0010948~negative regulation of cell cycle process                    |
| GOTERM_BP_ALL          | GO:2000134~negative regulation of G1/S transition of mitotic cell cycle |
| GOTERM_BP_ALL          | GO:1901988~negative regulation of cell cycle phase transition           |
| GOTERM_BP_ALL          | GO:1901991~negative regulation of mitotic cell cycle phase transition   |
| GOTERM_BP_ALL          | GO:0044773~mitotic DNA damage checkpoint                                |
| GOTERM_BP_ALL          | GO:0044774~mitotic DNA integrity checkpoint                             |
| GOTERM_BP_ALL          | GO:0000077~DNA damage checkpoint                                        |
| GOTERM_BP_ALL          | GO:0031570~DNA integrity checkpoint                                     |
| GOTERM_BP_ALL          | GO:0007093~mitotic cell cycle checkpoint                                |
| GOTERM_BP_ALL          | GO:0000075~cell cycle checkpoint                                        |
|                        |                                                                         |
| Annotation Cluster 128 | Enrichment Score: 1.2110820269825806                                    |
| Category               | Term                                                                    |
| GOTERM_BP_ALL          | GO:0031109~microtubule polymerization or depolymerization               |
| GOTERM_BP_ALL          | GO:0031110~regulation of microtubule polymerization or depolymerization |
| GOTERM_BP_ALL          | GO:1902903~regulation of supramolecular fiber organization              |
| GOTERM_BP_ALL          | GO:0046785~microtubule polymerization                                   |
| GOTERM_BP_ALL          | GO:0031113~regulation of microtubule polymerization                     |
| GOTERM_BP_ALL          | GO:0051258~protein polymerization                                       |
| GOTERM_BP_ALL          | GO:0032271~regulation of protein polymerization                         |
|                        |                                                                         |
| Annotation Cluster 129 | Enrichment Score: 1.1814818034786683                                    |
| Category               | Term                                                                    |
| GOTERM_BP_ALL          | GO:0046661~male sex differentiation                                     |
| GOTERM_BP_ALL          | GO:2000243~positive regulation of reproductive process                  |
| GOTERM_BP_ALL          | GO:2000241~regulation of reproductive process                           |
|                        |                                                                         |
| Annotation Cluster 130 | Enrichment Score: 1.167496300913339                                     |
| Category               | Term                                                                    |
| GOTERM_BP_ALL          | GO:0050805~negative regulation of synaptic transmission                 |
| GOTERM_BP_ALL          | GO:0032228~regulation of synaptic transmission, GABAergic               |
| GOTERM_BP_ALL          | GO:0046717~acid secretion                                               |
| GOTERM_BP_ALL          | GO:0006865~amino acid transport                                         |
| GOTERM_BP_ALL          | GO:0015718~monocarboxylic acid transport                                |
| GOTERM_BP_ALL          | GO:0046942~carboxylic acid transport                                    |
| GOTERM_BP_ALL          | GO:0015849~organic acid transport                                       |
| GOTERM_BP_ALL          | GO:0015711~organic anion transport                                      |

|                        |                                                                                   |
|------------------------|-----------------------------------------------------------------------------------|
| Annotation Cluster 131 | Enrichment Score: 1.1661439330933268                                              |
| Category               | Term                                                                              |
| GOTERM_BP_ALL          | GO:2000142~regulation of DNA-templated transcription, initiation                  |
| GOTERM_BP_ALL          | GO:0060260~regulation of transcription initiation from RNA polymerase II promoter |
| GOTERM_BP_ALL          | GO:0006367~transcription initiation from RNA polymerase II promoter               |
| Annotation Cluster 132 | Enrichment Score: 1.1589966404036662                                              |
| Category               | Term                                                                              |
| GOTERM_BP_ALL          | GO:0034504~protein localization to nucleus                                        |
| GOTERM_BP_ALL          | GO:1902593~single-organism nuclear import                                         |
| GOTERM_BP_ALL          | GO:0006606~protein import into nucleus                                            |
| GOTERM_BP_ALL          | GO:0044744~protein targeting to nucleus                                           |
| GOTERM_BP_ALL          | GO:0006886~intracellular protein transport                                        |
| GOTERM_BP_ALL          | GO:0051170~nuclear import                                                         |
| GOTERM_BP_ALL          | GO:0006605~protein targeting                                                      |
| GOTERM_BP_ALL          | GO:0010823~negative regulation of mitochondrion organization                      |
| GOTERM_BP_ALL          | GO:0072594~establishment of protein localization to organelle                     |
| GOTERM_BP_ALL          | GO:0017038~protein import                                                         |
| GOTERM_BP_ALL          | GO:0034103~regulation of tissue remodeling                                        |
| GOTERM_BP_ALL          | GO:0006913~nucleocytoplasmic transport                                            |
| GOTERM_BP_ALL          | GO:0051169~nuclear transport                                                      |
| Annotation Cluster 133 | Enrichment Score: 1.1532396625136823                                              |
| Category               | Term                                                                              |
| GOTERM_BP_ALL          | GO:0030199~collagen fibril organization                                           |
| GOTERM_BP_ALL          | GO:0030198~extracellular matrix organization                                      |
| GOTERM_BP_ALL          | GO:0043062~extracellular structure organization                                   |
| Annotation Cluster 134 | Enrichment Score: 1.151534929062636                                               |
| Category               | Term                                                                              |
| GOTERM_BP_ALL          | GO:0090335~regulation of brown fat cell differentiation                           |
| GOTERM_BP_ALL          | GO:0045444~fat cell differentiation                                               |
| GOTERM_BP_ALL          | GO:0050873~brown fat cell differentiation                                         |
| GOTERM_BP_ALL          | GO:0045598~regulation of fat cell differentiation                                 |
| Annotation Cluster 135 | Enrichment Score: 1.1330407774939146                                              |
| Category               | Term                                                                              |
| GOTERM_BP_ALL          | GO:0051937~catecholamine transport                                                |
| GOTERM_BP_ALL          | GO:0015844~monoamine transport                                                    |
| GOTERM_BP_ALL          | GO:0050432~catecholamine secretion                                                |
| GOTERM_BP_ALL          | GO:0015850~organic hydroxy compound transport                                     |
| Annotation Cluster 136 | Enrichment Score: 1.1268282549699506                                              |
| Category               | Term                                                                              |
| GOTERM_BP_ALL          | GO:0010770~positive regulation of cell morphogenesis involved in differentiation  |
| GOTERM_BP_ALL          | GO:0050900~leukocyte migration                                                    |
| GOTERM_BP_ALL          | GO:0030865~cortical cytoskeleton organization                                     |
| GOTERM_BP_ALL          | GO:0001736~establishment of planar polarity                                       |

|                        |                                                                                                      |
|------------------------|------------------------------------------------------------------------------------------------------|
| GOTERM_BP_ALL          | GO:0007164~establishment of tissue polarity                                                          |
|                        |                                                                                                      |
| Annotation Cluster 137 | Enrichment Score: 1.0875471456176335                                                                 |
| Category               | Term                                                                                                 |
| GOTERM_BP_ALL          | GO:0048147~negative regulation of fibroblast proliferation                                           |
| GOTERM_BP_ALL          | GO:0048145~regulation of fibroblast proliferation                                                    |
| GOTERM_BP_ALL          | GO:0048144~fibroblast proliferation                                                                  |
|                        |                                                                                                      |
| Annotation Cluster 138 | Enrichment Score: 1.0805701785981823                                                                 |
| Category               | Term                                                                                                 |
| GOTERM_BP_ALL          | GO:1902803~regulation of synaptic vesicle transport                                                  |
| GOTERM_BP_ALL          | GO:0070527~platelet aggregation                                                                      |
| GOTERM_BP_ALL          | GO:0034109~homotypic cell-cell adhesion                                                              |
| GOTERM_BP_ALL          | GO:0030168~platelet activation                                                                       |
| GOTERM_BP_ALL          | GO:0007596~blood coagulation                                                                         |
| GOTERM_BP_ALL          | GO:0007599~hemostasis                                                                                |
| GOTERM_BP_ALL          | GO:0050817~coagulation                                                                               |
| GOTERM_BP_ALL          | GO:0050878~regulation of body fluid levels                                                           |
|                        |                                                                                                      |
| Annotation Cluster 139 | Enrichment Score: 1.0346767240006902                                                                 |
| Category               | Term                                                                                                 |
| GOTERM_BP_ALL          | GO:0071396~cellular response to lipid                                                                |
| GOTERM_BP_ALL          | GO:0048545~response to steroid hormone                                                               |
| GOTERM_BP_ALL          | GO:1901654~response to ketone                                                                        |
| GOTERM_BP_ALL          | GO:0071383~cellular response to steroid hormone stimulus                                             |
|                        |                                                                                                      |
| Annotation Cluster 140 | Enrichment Score: 1.020055157513497                                                                  |
| Category               | Term                                                                                                 |
| GOTERM_BP_ALL          | GO:0051781~positive regulation of cell division                                                      |
| GOTERM_BP_ALL          | GO:0032467~positive regulation of cytokinesis                                                        |
| GOTERM_BP_ALL          | GO:0051302~regulation of cell division                                                               |
| GOTERM_BP_ALL          | GO:0032465~regulation of cytokinesis                                                                 |
| GOTERM_BP_ALL          | GO:0000910~cytokinesis                                                                               |
|                        |                                                                                                      |
| Annotation Cluster 141 | Enrichment Score: 1.0187373105429396                                                                 |
| Category               | Term                                                                                                 |
| GOTERM_BP_ALL          | GO:2000116~regulation of cysteine-type endopeptidase activity                                        |
| GOTERM_BP_ALL          | GO:0051336~regulation of hydrolase activity                                                          |
| GOTERM_BP_ALL          | GO:0052548~regulation of endopeptidase activity                                                      |
| GOTERM_BP_ALL          | GO:0043281~regulation of cysteine-type endopeptidase activity involved in apoptotic process          |
| GOTERM_BP_ALL          | GO:2001056~positive regulation of cysteine-type endopeptidase activity                               |
| GOTERM_BP_ALL          | GO:0010950~positive regulation of endopeptidase activity                                             |
| GOTERM_BP_ALL          | GO:0051345~positive regulation of hydrolase activity                                                 |
| GOTERM_BP_ALL          | GO:0052547~regulation of peptidase activity                                                          |
| GOTERM_BP_ALL          | GO:0010952~positive regulation of peptidase activity                                                 |
| GOTERM_BP_ALL          | GO:0043154~negative regulation of cysteine-type endopeptidase activity involved in apoptotic process |
| GOTERM_BP_ALL          | GO:0045862~positive regulation of proteolysis                                                        |
| GOTERM_BP_ALL          | GO:2000117~negative regulation of cysteine-type endopeptidase activity                               |

|                        |                                                                                                      |
|------------------------|------------------------------------------------------------------------------------------------------|
| GOTERM_BP_ALL          | GO:0043280~positive regulation of cysteine-type endopeptidase activity involved in apoptotic process |
| GOTERM_BP_ALL          | GO:0010951~negative regulation of endopeptidase activity                                             |
| GOTERM_BP_ALL          | GO:0051346~negative regulation of hydrolase activity                                                 |
| GOTERM_BP_ALL          | GO:0010466~negative regulation of peptidase activity                                                 |
| Annotation Cluster 142 | Enrichment Score: 1.0133462939982585                                                                 |
| Category               | Term                                                                                                 |
| GOTERM_BP_ALL          | GO:0010506~regulation of autophagy                                                                   |
| GOTERM_BP_ALL          | GO:0006914~autophagy                                                                                 |
| GOTERM_BP_ALL          | GO:0016241~regulation of macroautophagy                                                              |
| GOTERM_BP_ALL          | GO:1903008~organelle disassembly                                                                     |
| GOTERM_BP_ALL          | GO:0016239~positive regulation of macroautophagy                                                     |
| GOTERM_BP_ALL          | GO:0000422~mitophagy                                                                                 |
| GOTERM_BP_ALL          | GO:0061726~mitochondrion disassembly                                                                 |
| GOTERM_BP_ALL          | GO:0010508~positive regulation of autophagy                                                          |
| GOTERM_BP_ALL          | GO:0016236~macroautophagy                                                                            |
| Annotation Cluster 143 | Enrichment Score: 1.0010122107743045                                                                 |
| Category               | Term                                                                                                 |
| GOTERM_BP_ALL          | GO:0045197~establishment or maintenance of epithelial cell apical/basal polarity                     |
| GOTERM_BP_ALL          | GO:0035088~establishment or maintenance of apical/basal cell polarity                                |
| GOTERM_BP_ALL          | GO:0061245~establishment or maintenance of bipolar cell polarity                                     |
| Annotation Cluster 144 | Enrichment Score: 0.9939202383280086                                                                 |
| Category               | Term                                                                                                 |
| GOTERM_BP_ALL          | GO:0010770~positive regulation of cell morphogenesis involved in differentiation                     |
| GOTERM_BP_ALL          | GO:0006911~phagocytosis, engulfment                                                                  |
| GOTERM_BP_ALL          | GO:0099024~plasma membrane invagination                                                              |
| GOTERM_BP_ALL          | GO:1900026~positive regulation of substrate adhesion-dependent cell spreading                        |
| GOTERM_BP_ALL          | GO:0010324~membrane invagination                                                                     |
| GOTERM_BP_ALL          | GO:0050900~leukocyte migration                                                                       |
| GOTERM_BP_ALL          | GO:1900024~regulation of substrate adhesion-dependent cell spreading                                 |
| GOTERM_BP_ALL          | GO:0010811~positive regulation of cell-substrate adhesion                                            |
| GOTERM_BP_ALL          | GO:0032956~regulation of actin cytoskeleton organization                                             |
| GOTERM_BP_ALL          | GO:0006909~phagocytosis                                                                              |
| GOTERM_BP_ALL          | GO:0032970~regulation of actin filament-based process                                                |
| GOTERM_BP_ALL          | GO:0034446~substrate adhesion-dependent cell spreading                                               |
| GOTERM_BP_ALL          | GO:0060491~regulation of cell projection assembly                                                    |
| GOTERM_BP_ALL          | GO:0030031~cell projection assembly                                                                  |
| Annotation Cluster 145 | Enrichment Score: 0.984300478220346                                                                  |
| Category               | Term                                                                                                 |
| GOTERM_BP_ALL          | GO:0071346~cellular response to interferon-gamma                                                     |
| GOTERM_BP_ALL          | GO:0034341~response to interferon-gamma                                                              |
| GOTERM_BP_ALL          | GO:0045087~innate immune response                                                                    |
| Annotation Cluster 146 | Enrichment Score: 0.9350044975303342                                                                 |

|                        |                                                                                                 |
|------------------------|-------------------------------------------------------------------------------------------------|
| Category               | Term                                                                                            |
| GOTERM_BP_ALL          | GO:0007052~mitotic spindle organization                                                         |
| GOTERM_BP_ALL          | GO:1902850~microtubule cytoskeleton organization involved in mitosis                            |
| GOTERM_BP_ALL          | GO:0007051~spindle organization                                                                 |
|                        |                                                                                                 |
| Annotation Cluster 147 | Enrichment Score: 0.9293366712249611                                                            |
| Category               | Term                                                                                            |
| GOTERM_BP_ALL          | GO:0050954~sensory perception of mechanical stimulus                                            |
| GOTERM_BP_ALL          | GO:0007605~sensory perception of sound                                                          |
| GOTERM_BP_ALL          | GO:0007600~sensory perception                                                                   |
|                        |                                                                                                 |
| Annotation Cluster 148 | Enrichment Score: 0.926302886838678                                                             |
| Category               | Term                                                                                            |
| GOTERM_BP_ALL          | GO:2000377~regulation of reactive oxygen species metabolic process                              |
| GOTERM_BP_ALL          | GO:1903426~regulation of reactive oxygen species biosynthetic process                           |
| GOTERM_BP_ALL          | GO:1903409~reactive oxygen species biosynthetic process                                         |
| GOTERM_BP_ALL          | GO:2000378~negative regulation of reactive oxygen species metabolic process                     |
| GOTERM_BP_ALL          | GO:0072593~reactive oxygen species metabolic process                                            |
| GOTERM_BP_ALL          | GO:2000379~positive regulation of reactive oxygen species metabolic process                     |
|                        |                                                                                                 |
| Annotation Cluster 149 | Enrichment Score: 0.8782832044942449                                                            |
| Category               | Term                                                                                            |
| GOTERM_BP_ALL          | GO:0055088~lipid homeostasis                                                                    |
| GOTERM_BP_ALL          | GO:0046890~regulation of lipid biosynthetic process                                             |
| GOTERM_BP_ALL          | GO:0008610~lipid biosynthetic process                                                           |
|                        |                                                                                                 |
| Annotation Cluster 150 | Enrichment Score: 0.8781353687507323                                                            |
| Category               | Term                                                                                            |
| GOTERM_BP_ALL          | GO:0048024~regulation of mRNA splicing, via spliceosome                                         |
| GOTERM_BP_ALL          | GO:0033119~negative regulation of RNA splicing                                                  |
| GOTERM_BP_ALL          | GO:0043484~regulation of RNA splicing                                                           |
| GOTERM_BP_ALL          | GO:0050684~regulation of mRNA processing                                                        |
| GOTERM_BP_ALL          | GO:1903312~negative regulation of mRNA metabolic process                                        |
| GOTERM_BP_ALL          | GO:1903311~regulation of mRNA metabolic process                                                 |
| GOTERM_BP_ALL          | GO:0000381~regulation of alternative mRNA splicing, via spliceosome                             |
| GOTERM_BP_ALL          | GO:0008380~RNA splicing                                                                         |
| GOTERM_BP_ALL          | GO:0000377~RNA splicing, via transesterification reactions with bulged adenosine as nucleophile |
| GOTERM_BP_ALL          | GO:0000398~mRNA splicing, via spliceosome                                                       |
| GOTERM_BP_ALL          | GO:0000375~RNA splicing, via transesterification reactions                                      |
| GOTERM_BP_ALL          | GO:0006397~mRNA processing                                                                      |
| GOTERM_BP_ALL          | GO:0006396~RNA processing                                                                       |
| GOTERM_BP_ALL          | GO:0016071~mRNA metabolic process                                                               |
|                        |                                                                                                 |
| Annotation Cluster 151 | Enrichment Score: 0.8757353659517456                                                            |
| Category               | Term                                                                                            |
| GOTERM_BP_ALL          | GO:0018108~peptidyl-tyrosine phosphorylation                                                    |
| GOTERM_BP_ALL          | GO:0018212~peptidyl-tyrosine modification                                                       |
| GOTERM_BP_ALL          | GO:0010675~regulation of cellular carbohydrate metabolic process                                |



|                        |                                                                                |
|------------------------|--------------------------------------------------------------------------------|
| GOTERM_BP_ALL          | GO:0050730~regulation of peptidyl-tyrosine phosphorylation                     |
| GOTERM_BP_ALL          | GO:0050731~positive regulation of peptidyl-tyrosine phosphorylation            |
|                        |                                                                                |
| Annotation Cluster 152 | Enrichment Score: 0.8717246355036814                                           |
| Category               | Term                                                                           |
| GOTERM_BP_ALL          | GO:0071229~cellular response to acid chemical                                  |
| GOTERM_BP_ALL          | GO:0071300~cellular response to retinoic acid                                  |
| GOTERM_BP_ALL          | GO:0032526~response to retinoic acid                                           |
|                        |                                                                                |
| Annotation Cluster 153 | Enrichment Score: 0.846001510025847                                            |
| Category               | Term                                                                           |
| GOTERM_BP_ALL          | GO:0030225~macrophage differentiation                                          |
| GOTERM_BP_ALL          | GO:0002262~myeloid cell homeostasis                                            |
| GOTERM_BP_ALL          | GO:1904036~negative regulation of epithelial cell apoptotic process            |
| GOTERM_BP_ALL          | GO:1904019~epithelial cell apoptotic process                                   |
| GOTERM_BP_ALL          | GO:1904035~regulation of epithelial cell apoptotic process                     |
| GOTERM_BP_ALL          | GO:0030218~erythrocyte differentiation                                         |
| GOTERM_BP_ALL          | GO:0034101~erythrocyte homeostasis                                             |
|                        |                                                                                |
| Annotation Cluster 154 | Enrichment Score: 0.84587242377765                                             |
| Category               | Term                                                                           |
| GOTERM_BP_ALL          | GO:0009566~fertilization                                                       |
| GOTERM_BP_ALL          | GO:0007338~single fertilization                                                |
| GOTERM_BP_ALL          | GO:0048477~oogenesis                                                           |
| GOTERM_BP_ALL          | GO:0007292~female gamete generation                                            |
| GOTERM_BP_ALL          | GO:0007281~germ cell development                                               |
| GOTERM_BP_ALL          | GO:0007276~gamete generation                                                   |
| GOTERM_BP_ALL          | GO:0022412~cellular process involved in reproduction in multicellular organism |
|                        |                                                                                |
| Annotation Cluster 155 | Enrichment Score: 0.8368124959811799                                           |
| Category               | Term                                                                           |
| GOTERM_BP_ALL          | GO:0032409~regulation of transporter activity                                  |
| GOTERM_BP_ALL          | GO:0022898~regulation of transmembrane transporter activity                    |
| GOTERM_BP_ALL          | GO:0050795~regulation of behavior                                              |
| GOTERM_BP_ALL          | GO:2001257~regulation of cation channel activity                               |
| GOTERM_BP_ALL          | GO:0032412~regulation of ion transmembrane transporter activity                |
|                        |                                                                                |
| Annotation Cluster 156 | Enrichment Score: 0.8241047612144611                                           |
| Category               | Term                                                                           |
| GOTERM_BP_ALL          | GO:0006979~response to oxidative stress                                        |
| GOTERM_BP_ALL          | GO:0042542~response to hydrogen peroxide                                       |
| GOTERM_BP_ALL          | GO:0000302~response to reactive oxygen species                                 |
|                        |                                                                                |
| Annotation Cluster 157 | Enrichment Score: 0.7977590250018755                                           |
| Category               | Term                                                                           |
| GOTERM_BP_ALL          | GO:1903578~regulation of ATP metabolic process                                 |
| GOTERM_BP_ALL          | GO:0009135~purine nucleoside diphosphate metabolic process                     |
| GOTERM_BP_ALL          | GO:0009179~purine ribonucleoside diphosphate metabolic process                 |
| GOTERM_BP_ALL          | GO:0044723~single-organism carbohydrate metabolic process                      |
| GOTERM_BP_ALL          | GO:0043470~regulation of carbohydrate catabolic process                        |

|               |                                                                         |
|---------------|-------------------------------------------------------------------------|
| GOTERM_BP_ALL | GO:0006090~pyruvate metabolic process                                   |
| GOTERM_BP_ALL | GO:0051196~regulation of coenzyme metabolic process                     |
| GOTERM_BP_ALL | GO:0009185~ribonucleoside diphosphate metabolic process                 |
| GOTERM_BP_ALL | GO:1900542~regulation of purine nucleotide metabolic process            |
| GOTERM_BP_ALL | GO:0006140~regulation of nucleotide metabolic process                   |
| GOTERM_BP_ALL | GO:0051193~regulation of cofactor metabolic process                     |
| GOTERM_BP_ALL | GO:0009132~nucleoside diphosphate metabolic process                     |
| GOTERM_BP_ALL | GO:0043467~regulation of generation of precursor metabolites and energy |
| GOTERM_BP_ALL | GO:0005996~monosaccharide metabolic process                             |
| GOTERM_BP_ALL | GO:0046031~ADP metabolic process                                        |
| GOTERM_BP_ALL | GO:0046496~nicotinamide nucleotide metabolic process                    |
| GOTERM_BP_ALL | GO:0019362~pyridine nucleotide metabolic process                        |
| GOTERM_BP_ALL | GO:0019637~organophosphate metabolic process                            |
| GOTERM_BP_ALL | GO:0072524~pyridine-containing compound metabolic process               |
| GOTERM_BP_ALL | GO:0019318~hexose metabolic process                                     |
| GOTERM_BP_ALL | GO:0005975~carbohydrate metabolic process                               |
| GOTERM_BP_ALL | GO:0006110~regulation of glycolytic process                             |
| GOTERM_BP_ALL | GO:0006733~oxidoreduction coenzyme metabolic process                    |
| GOTERM_BP_ALL | GO:0006109~regulation of carbohydrate metabolic process                 |
| GOTERM_BP_ALL | GO:0006006~glucose metabolic process                                    |
| GOTERM_BP_ALL | GO:0045912~negative regulation of carbohydrate metabolic process        |
| GOTERM_BP_ALL | GO:0044262~cellular carbohydrate metabolic process                      |
| GOTERM_BP_ALL | GO:0044724~single-organism carbohydrate catabolic process               |
| GOTERM_BP_ALL | GO:0006096~glycolytic process                                           |
| GOTERM_BP_ALL | GO:0006757~ATP generation from ADP                                      |
| GOTERM_BP_ALL | GO:0045913~positive regulation of carbohydrate metabolic process        |
| GOTERM_BP_ALL | GO:0010675~regulation of cellular carbohydrate metabolic process        |
| GOTERM_BP_ALL | GO:0050730~regulation of peptidyl-tyrosine phosphorylation              |
| GOTERM_BP_ALL | GO:0009126~purine nucleoside monophosphate metabolic process            |
| GOTERM_BP_ALL | GO:0009167~purine ribonucleoside monophosphate metabolic process        |
| GOTERM_BP_ALL | GO:0006165~nucleoside diphosphate phosphorylation                       |
| GOTERM_BP_ALL | GO:0045981~positive regulation of nucleotide metabolic process          |
| GOTERM_BP_ALL | GO:0046939~nucleotide phosphorylation                                   |
| GOTERM_BP_ALL | GO:1900544~positive regulation of purine nucleotide metabolic process   |
| GOTERM_BP_ALL | GO:0006163~purine nucleotide metabolic process                          |
| GOTERM_BP_ALL | GO:0016052~carbohydrate catabolic process                               |
| GOTERM_BP_ALL | GO:0009161~ribonucleoside monophosphate metabolic process               |
| GOTERM_BP_ALL | GO:0009123~nucleoside monophosphate metabolic process                   |
| GOTERM_BP_ALL | GO:0009117~nucleotide metabolic process                                 |
| GOTERM_BP_ALL | GO:0072521~purine-containing compound metabolic process                 |
| GOTERM_BP_ALL | GO:0006753~nucleoside phosphate metabolic process                       |
| GOTERM_BP_ALL | GO:0046034~ATP metabolic process                                        |
| GOTERM_BP_ALL | GO:0010906~regulation of glucose metabolic process                      |
| GOTERM_BP_ALL | GO:0009150~purine ribonucleotide metabolic process                      |
| GOTERM_BP_ALL | GO:0055086~nucleobase-containing small molecule metabolic process       |
| GOTERM_BP_ALL | GO:0009205~purine ribonucleoside triphosphate metabolic process         |
| GOTERM_BP_ALL | GO:0009144~purine nucleoside triphosphate metabolic process             |
| GOTERM_BP_ALL | GO:0009199~ribonucleoside triphosphate metabolic process                |
| GOTERM_BP_ALL | GO:0009259~ribonucleotide metabolic process                             |
| GOTERM_BP_ALL | GO:0019693~ribose phosphate metabolic process                           |
| GOTERM_BP_ALL | GO:0009141~nucleoside triphosphate metabolic process                    |

|                        |                                                                 |
|------------------------|-----------------------------------------------------------------|
| GOTERM_BP_ALL          | GO:0006732~coenzyme metabolic process                           |
| GOTERM_BP_ALL          | GO:0006091~generation of precursor metabolites and energy       |
| GOTERM_BP_ALL          | GO:0044712~single-organism catabolic process                    |
| GOTERM_BP_ALL          | GO:0015980~energy derivation by oxidation of organic compounds  |
| GOTERM_BP_ALL          | GO:0044281~small molecule metabolic process                     |
| GOTERM_BP_ALL          | GO:0032787~monocarboxylic acid metabolic process                |
| GOTERM_BP_ALL          | GO:0043436~oxoacid metabolic process                            |
| GOTERM_BP_ALL          | GO:0019752~carboxylic acid metabolic process                    |
| GOTERM_BP_ALL          | GO:0006082~organic acid metabolic process                       |
| GOTERM_BP_ALL          | GO:1901135~carbohydrate derivative metabolic process            |
| GOTERM_BP_ALL          | GO:0051186~cofactor metabolic process                           |
| GOTERM_BP_ALL          | GO:0055114~oxidation-reduction process                          |
|                        |                                                                 |
| Annotation Cluster 158 | Enrichment Score: 0.7819598211594245                            |
| Category               | Term                                                            |
| GOTERM_BP_ALL          | GO:0050920~regulation of chemotaxis                             |
| GOTERM_BP_ALL          | GO:0050921~positive regulation of chemotaxis                    |
| GOTERM_BP_ALL          | GO:1902622~regulation of neutrophil migration                   |
| GOTERM_BP_ALL          | GO:0043277~apoptotic cell clearance                             |
| GOTERM_BP_ALL          | GO:0050900~leukocyte migration                                  |
| GOTERM_BP_ALL          | GO:0002685~regulation of leukocyte migration                    |
| GOTERM_BP_ALL          | GO:0097529~myeloid leukocyte migration                          |
| GOTERM_BP_ALL          | GO:0006909~phagocytosis                                         |
| GOTERM_BP_ALL          | GO:0002690~positive regulation of leukocyte chemotaxis          |
| GOTERM_BP_ALL          | GO:0032103~positive regulation of response to external stimulus |
| GOTERM_BP_ALL          | GO:0002688~regulation of leukocyte chemotaxis                   |
| GOTERM_BP_ALL          | GO:0060326~cell chemotaxis                                      |
| GOTERM_BP_ALL          | GO:0002687~positive regulation of leukocyte migration           |
| GOTERM_BP_ALL          | GO:0030595~leukocyte chemotaxis                                 |
|                        |                                                                 |
| Annotation Cluster 159 | Enrichment Score: 0.7774483433735004                            |
| Category               | Term                                                            |
| GOTERM_BP_ALL          | GO:0060969~negative regulation of gene silencing                |
| GOTERM_BP_ALL          | GO:0060968~regulation of gene silencing                         |
| GOTERM_BP_ALL          | GO:0016458~gene silencing                                       |
|                        |                                                                 |
| Annotation Cluster 160 | Enrichment Score: 0.7762443138570287                            |
| Category               | Term                                                            |
| GOTERM_BP_ALL          | GO:0032606~type I interferon production                         |
| GOTERM_BP_ALL          | GO:0032608~interferon-beta production                           |
| GOTERM_BP_ALL          | GO:0032479~regulation of type I interferon production           |
| GOTERM_BP_ALL          | GO:0032648~regulation of interferon-beta production             |
| GOTERM_BP_ALL          | GO:0001816~cytokine production                                  |
| GOTERM_BP_ALL          | GO:0001817~regulation of cytokine production                    |
|                        |                                                                 |
| Annotation Cluster 161 | Enrichment Score: 0.7679087538060161                            |
| Category               | Term                                                            |
| GOTERM_BP_ALL          | GO:0009566~fertilization                                        |
| GOTERM_BP_ALL          | GO:0007565~female pregnancy                                     |
| GOTERM_BP_ALL          | GO:0044706~multi-multicellular organism process                 |
|                        |                                                                 |

|                        |                                                                      |
|------------------------|----------------------------------------------------------------------|
| Annotation Cluster 162 | Enrichment Score: 0.7624505122664094                                 |
| Category               | Term                                                                 |
| GOTERM_BP_ALL          | GO:0046189~phenol-containing compound biosynthetic process           |
| GOTERM_BP_ALL          | GO:1901617~organic hydroxy compound biosynthetic process             |
| GOTERM_BP_ALL          | GO:1901615~organic hydroxy compound metabolic process                |
| GOTERM_BP_ALL          | GO:0018958~phenol-containing compound metabolic process              |
|                        |                                                                      |
| Annotation Cluster 163 | Enrichment Score: 0.7503871878334597                                 |
| Category               | Term                                                                 |
| GOTERM_BP_ALL          | GO:0018107~peptidyl-threonine phosphorylation                        |
| GOTERM_BP_ALL          | GO:0018210~peptidyl-threonine modification                           |
| GOTERM_BP_ALL          | GO:0018209~peptidyl-serine modification                              |
| GOTERM_BP_ALL          | GO:0018105~peptidyl-serine phosphorylation                           |
|                        |                                                                      |
| Annotation Cluster 164 | Enrichment Score: 0.7247209328081105                                 |
| Category               | Term                                                                 |
| GOTERM_BP_ALL          | GO:0000082~G1/S transition of mitotic cell cycle                     |
| GOTERM_BP_ALL          | GO:0045727~positive regulation of translation                        |
| GOTERM_BP_ALL          | GO:0034250~positive regulation of cellular amide metabolic process   |
| GOTERM_BP_ALL          | GO:0035196~production of miRNAs involved in gene silencing by miRNA  |
| GOTERM_BP_ALL          | GO:0070918~production of small RNA involved in gene silencing by RNA |
| GOTERM_BP_ALL          | GO:0031050~dsRNA fragmentation                                       |
| GOTERM_BP_ALL          | GO:0071359~cellular response to dsRNA                                |
| GOTERM_BP_ALL          | GO:0043331~response to dsRNA                                         |
| GOTERM_BP_ALL          | GO:0016458~gene silencing                                            |
| GOTERM_BP_ALL          | GO:0017148~negative regulation of translation                        |
| GOTERM_BP_ALL          | GO:0034249~negative regulation of cellular amide metabolic process   |
| GOTERM_BP_ALL          | GO:0035195~gene silencing by miRNA                                   |
| GOTERM_BP_ALL          | GO:0035194~posttranscriptional gene silencing by RNA                 |
| GOTERM_BP_ALL          | GO:0016441~posttranscriptional gene silencing                        |
| GOTERM_BP_ALL          | GO:0031047~gene silencing by RNA                                     |
|                        |                                                                      |
| Annotation Cluster 165 | Enrichment Score: 0.7074469790291038                                 |
| Category               | Term                                                                 |
| GOTERM_BP_ALL          | GO:1903201~regulation of oxidative stress-induced cell death         |
| GOTERM_BP_ALL          | GO:0034599~cellular response to oxidative stress                     |
| GOTERM_BP_ALL          | GO:1900407~regulation of cellular response to oxidative stress       |
| GOTERM_BP_ALL          | GO:0036473~cell death in response to oxidative stress                |
| GOTERM_BP_ALL          | GO:1902882~regulation of response to oxidative stress                |
|                        |                                                                      |
| Annotation Cluster 166 | Enrichment Score: 0.6971883212428183                                 |
| Category               | Term                                                                 |
| GOTERM_BP_ALL          | GO:0031669~cellular response to nutrient levels                      |
| GOTERM_BP_ALL          | GO:0009267~cellular response to starvation                           |
| GOTERM_BP_ALL          | GO:0042594~response to starvation                                    |
|                        |                                                                      |
| Annotation Cluster 167 | Enrichment Score: 0.6689723721096669                                 |
| Category               | Term                                                                 |
| GOTERM_BP_ALL          | GO:0046328~regulation of JNK cascade                                 |
| GOTERM_BP_ALL          | GO:0007254~JNK cascade                                               |
| GOTERM_BP_ALL          | GO:0032872~regulation of stress-activated MAPK cascade               |

|                        |                                                                                                                                      |
|------------------------|--------------------------------------------------------------------------------------------------------------------------------------|
| GOTERM_BP_ALL          | GO:0070302~regulation of stress-activated protein kinase signaling cascade                                                           |
| GOTERM_BP_ALL          | GO:0051403~stress-activated MAPK cascade                                                                                             |
| GOTERM_BP_ALL          | GO:0031098~stress-activated protein kinase signaling cascade                                                                         |
| GOTERM_BP_ALL          | GO:0046330~positive regulation of JNK cascade                                                                                        |
| GOTERM_BP_ALL          | GO:0032874~positive regulation of stress-activated MAPK cascade                                                                      |
| GOTERM_BP_ALL          | GO:0070304~positive regulation of stress-activated protein kinase signaling cascade                                                  |
|                        |                                                                                                                                      |
| Annotation Cluster 168 | Enrichment Score: 0.6685013142912606                                                                                                 |
| Category               | Term                                                                                                                                 |
| GOTERM_BP_ALL          | GO:0006629~lipid metabolic process                                                                                                   |
| GOTERM_BP_ALL          | GO:0008610~lipid biosynthetic process                                                                                                |
| GOTERM_BP_ALL          | GO:0044255~cellular lipid metabolic process                                                                                          |
|                        |                                                                                                                                      |
| Annotation Cluster 169 | Enrichment Score: 0.6466351724600641                                                                                                 |
| Category               | Term                                                                                                                                 |
| GOTERM_BP_ALL          | GO:0008015~blood circulation                                                                                                         |
| GOTERM_BP_ALL          | GO:0003013~circulatory system process                                                                                                |
| GOTERM_BP_ALL          | GO:0060047~heart contraction                                                                                                         |
| GOTERM_BP_ALL          | GO:0003015~heart process                                                                                                             |
|                        |                                                                                                                                      |
| Annotation Cluster 170 | Enrichment Score: 0.6264524558604854                                                                                                 |
| Category               | Term                                                                                                                                 |
| GOTERM_BP_ALL          | GO:0002366~leukocyte activation involved in immune response                                                                          |
| GOTERM_BP_ALL          | GO:0002263~cell activation involved in immune response                                                                               |
| GOTERM_BP_ALL          | GO:0002252~immune effector process                                                                                                   |
| GOTERM_BP_ALL          | GO:0002443~leukocyte mediated immunity                                                                                               |
| GOTERM_BP_ALL          | GO:0006952~defense response                                                                                                          |
| GOTERM_BP_ALL          | GO:0050776~regulation of immune response                                                                                             |
| GOTERM_BP_ALL          | GO:0002757~immune response-activating signal transduction                                                                            |
| GOTERM_BP_ALL          | GO:0050778~positive regulation of immune response                                                                                    |
| GOTERM_BP_ALL          | GO:0002429~immune response-activating cell surface receptor signaling pathway                                                        |
| GOTERM_BP_ALL          | GO:0002764~immune response-regulating signaling pathway                                                                              |
| GOTERM_BP_ALL          | GO:0031347~regulation of defense response                                                                                            |
| GOTERM_BP_ALL          | GO:0050851~antigen receptor-mediated signaling pathway                                                                               |
| GOTERM_BP_ALL          | GO:0002768~immune response-regulating cell surface receptor signaling pathway                                                        |
| GOTERM_BP_ALL          | GO:0002253~activation of immune response                                                                                             |
| GOTERM_BP_ALL          | GO:0009607~response to biotic stimulus                                                                                               |
| GOTERM_BP_ALL          | GO:0050853~B cell receptor signaling pathway                                                                                         |
| GOTERM_BP_ALL          | GO:0045087~innate immune response                                                                                                    |
| GOTERM_BP_ALL          | GO:0006955~immune response                                                                                                           |
| GOTERM_BP_ALL          | GO:0002460~adaptive immune response based on somatic recombination of immune receptors built from immunoglobulin superfamily domains |
| GOTERM_BP_ALL          | GO:0045088~regulation of innate immune response                                                                                      |
| GOTERM_BP_ALL          | GO:0051707~response to other organism                                                                                                |
| GOTERM_BP_ALL          | GO:0043207~response to external biotic stimulus                                                                                      |
| GOTERM_BP_ALL          | GO:0002758~innate immune response-activating signal transduction                                                                     |
| GOTERM_BP_ALL          | GO:0002218~activation of innate immune response                                                                                      |
| GOTERM_BP_ALL          | GO:0009617~response to bacterium                                                                                                     |

|                        |                                                                                                                                                    |
|------------------------|----------------------------------------------------------------------------------------------------------------------------------------------------|
| GOTERM_BP_ALL          | GO:0045089~positive regulation of innate immune response                                                                                           |
| GOTERM_BP_ALL          | GO:0031349~positive regulation of defense response                                                                                                 |
| GOTERM_BP_ALL          | GO:0002250~adaptive immune response                                                                                                                |
| GOTERM_BP_ALL          | GO:0006959~humoral immune response                                                                                                                 |
|                        |                                                                                                                                                    |
| Annotation Cluster 171 | Enrichment Score: 0.5941209905045322                                                                                                               |
| Category               | Term                                                                                                                                               |
| GOTERM_BP_ALL          | GO:0002285~lymphocyte activation involved in immune response                                                                                       |
| GOTERM_BP_ALL          | GO:0002703~regulation of leukocyte mediated immunity                                                                                               |
| GOTERM_BP_ALL          | GO:0002443~leukocyte mediated immunity                                                                                                             |
| GOTERM_BP_ALL          | GO:0050778~positive regulation of immune response                                                                                                  |
|                        | GO:0002822~regulation of adaptive immune response based on somatic recombination of immune receptors built from immunoglobulin superfamily domains |
| GOTERM_BP_ALL          | GO:0002819~regulation of adaptive immune response                                                                                                  |
| GOTERM_BP_ALL          | GO:0002706~regulation of lymphocyte mediated immunity                                                                                              |
|                        | GO:0002460~adaptive immune response based on somatic recombination of immune receptors built from immunoglobulin superfamily domains               |
| GOTERM_BP_ALL          | GO:0002449~lymphocyte mediated immunity                                                                                                            |
| GOTERM_BP_ALL          | GO:0002250~adaptive immune response                                                                                                                |
|                        |                                                                                                                                                    |
| Annotation Cluster 172 | Enrichment Score: 0.5843041661961808                                                                                                               |
| Category               | Term                                                                                                                                               |
| GOTERM_BP_ALL          | GO:0032602~chemokine production                                                                                                                    |
| GOTERM_BP_ALL          | GO:0032642~regulation of chemokine production                                                                                                      |
| GOTERM_BP_ALL          | GO:0032722~positive regulation of chemokine production                                                                                             |
| GOTERM_BP_ALL          | GO:0032755~positive regulation of interleukin-6 production                                                                                         |
| GOTERM_BP_ALL          | GO:0032680~regulation of tumor necrosis factor production                                                                                          |
| GOTERM_BP_ALL          | GO:0032760~positive regulation of tumor necrosis factor production                                                                                 |
| GOTERM_BP_ALL          | GO:0071706~tumor necrosis factor superfamily cytokine production                                                                                   |
|                        | GO:1903555~regulation of tumor necrosis factor superfamily cytokine production                                                                     |
| GOTERM_BP_ALL          | GO:1903557~positive regulation of tumor necrosis factor superfamily cytokine production                                                            |
| GOTERM_BP_ALL          | GO:0001819~positive regulation of cytokine production                                                                                              |
| GOTERM_BP_ALL          | GO:0001816~cytokine production                                                                                                                     |
| GOTERM_BP_ALL          | GO:0001817~regulation of cytokine production                                                                                                       |
| GOTERM_BP_ALL          | GO:0032635~interleukin-6 production                                                                                                                |
| GOTERM_BP_ALL          | GO:0032640~tumor necrosis factor production                                                                                                        |
| GOTERM_BP_ALL          | GO:0032675~regulation of interleukin-6 production                                                                                                  |
|                        |                                                                                                                                                    |
| Annotation Cluster 173 | Enrichment Score: 0.56259334801895                                                                                                                 |
| Category               | Term                                                                                                                                               |
| GOTERM_BP_ALL          | GO:0015672~monovalent inorganic cation transport                                                                                                   |
| GOTERM_BP_ALL          | GO:0071804~cellular potassium ion transport                                                                                                        |
| GOTERM_BP_ALL          | GO:0071805~potassium ion transmembrane transport                                                                                                   |
| GOTERM_BP_ALL          | GO:0006813~potassium ion transport                                                                                                                 |
|                        |                                                                                                                                                    |
| Annotation Cluster 174 | Enrichment Score: 0.5185923868958442                                                                                                               |
| Category               | Term                                                                                                                                               |
| GOTERM_BP_ALL          | GO:0032984~macromolecular complex disassembly                                                                                                      |

|                        |                                                                         |
|------------------------|-------------------------------------------------------------------------|
| GOTERM_BP_ALL          | GO:0043244~regulation of protein complex disassembly                    |
| GOTERM_BP_ALL          | GO:0043624~cellular protein complex disassembly                         |
| GOTERM_BP_ALL          | GO:0043241~protein complex disassembly                                  |
|                        |                                                                         |
| Annotation Cluster 175 | Enrichment Score: 0.4945374685345561                                    |
| Category               | Term                                                                    |
| GOTERM_BP_ALL          | GO:1902749~regulation of cell cycle G2/M phase transition               |
| GOTERM_BP_ALL          | GO:0010389~regulation of G2/M transition of mitotic cell cycle          |
| GOTERM_BP_ALL          | GO:0000086~G2/M transition of mitotic cell cycle                        |
| GOTERM_BP_ALL          | GO:0044839~cell cycle G2/M phase transition                             |
|                        |                                                                         |
| Annotation Cluster 176 | Enrichment Score: 0.4150920120706421                                    |
| Category               | Term                                                                    |
| GOTERM_BP_ALL          | GO:0045727~positive regulation of translation                           |
| GOTERM_BP_ALL          | GO:0034250~positive regulation of cellular amide metabolic process      |
| GOTERM_BP_ALL          | GO:0034248~regulation of cellular amide metabolic process               |
| GOTERM_BP_ALL          | GO:0006417~regulation of translation                                    |
| GOTERM_BP_ALL          | GO:0006412~translation                                                  |
| GOTERM_BP_ALL          | GO:0043604~amide biosynthetic process                                   |
| GOTERM_BP_ALL          | GO:0043043~peptide biosynthetic process                                 |
| GOTERM_BP_ALL          | GO:0006518~peptide metabolic process                                    |
| GOTERM_BP_ALL          | GO:0043603~cellular amide metabolic process                             |
| GOTERM_BP_ALL          | GO:0010608~posttranscriptional regulation of gene expression            |
| GOTERM_BP_ALL          | GO:1901564~organonitrogen compound metabolic process                    |
| GOTERM_BP_ALL          | GO:1901566~organonitrogen compound biosynthetic process                 |
| GOTERM_BP_ALL          | GO:0017148~negative regulation of translation                           |
| GOTERM_BP_ALL          | GO:0034249~negative regulation of cellular amide metabolic process      |
|                        |                                                                         |
| Annotation Cluster 177 | Enrichment Score: 0.41346667047514113                                   |
| Category               | Term                                                                    |
| GOTERM_BP_ALL          | GO:0031347~regulation of defense response                               |
| GOTERM_BP_ALL          | GO:0050728~negative regulation of inflammatory response                 |
| GOTERM_BP_ALL          | GO:0031348~negative regulation of defense response                      |
| GOTERM_BP_ALL          | GO:0032102~negative regulation of response to external stimulus         |
| GOTERM_BP_ALL          | GO:0050727~regulation of inflammatory response                          |
|                        |                                                                         |
| Annotation Cluster 178 | Enrichment Score: 0.3811462164125748                                    |
| Category               | Term                                                                    |
| GOTERM_BP_ALL          | GO:0045862~positive regulation of proteolysis                           |
| GOTERM_BP_ALL          | GO:0070372~regulation of ERK1 and ERK2 cascade                          |
| GOTERM_BP_ALL          | GO:0070371~ERK1 and ERK2 cascade                                        |
| GOTERM_BP_ALL          | GO:0070374~positive regulation of ERK1 and ERK2 cascade                 |
|                        |                                                                         |
| Annotation Cluster 179 | Enrichment Score: 0.3806722116552417                                    |
| Category               | Term                                                                    |
| GOTERM_BP_ALL          | GO:0031333~negative regulation of protein complex assembly              |
| GOTERM_BP_ALL          | GO:0070897~DNA-templated transcriptional preinitiation complex assembly |
| GOTERM_BP_ALL          | GO:1903902~positive regulation of viral life cycle                      |
| GOTERM_BP_ALL          | GO:0048524~positive regulation of viral process                         |
| GOTERM_BP_ALL          | GO:0019079~viral genome replication                                     |
| GOTERM_BP_ALL          | GO:0043902~positive regulation of multi-organism process                |

|                        |                                                                                      |
|------------------------|--------------------------------------------------------------------------------------|
| GOTERM_BP_ALL          | GO:0016032~viral process                                                             |
| GOTERM_BP_ALL          | GO:1903900~regulation of viral life cycle                                            |
| GOTERM_BP_ALL          | GO:0044764~multi-organism cellular process                                           |
| GOTERM_BP_ALL          | GO:0043900~regulation of multi-organism process                                      |
| GOTERM_BP_ALL          | GO:0044403~symbiosis, encompassing mutualism through parasitism                      |
| GOTERM_BP_ALL          | GO:0044419~interspecies interaction between organisms                                |
| GOTERM_BP_ALL          | GO:0009615~response to virus                                                         |
| GOTERM_BP_ALL          | GO:0019058~viral life cycle                                                          |
| GOTERM_BP_ALL          | GO:0050792~regulation of viral process                                               |
| GOTERM_BP_ALL          | GO:0043903~regulation of symbiosis, encompassing mutualism through parasitism        |
|                        |                                                                                      |
| Annotation Cluster 180 | Enrichment Score: 0.3722673512565431                                                 |
| Category               | Term                                                                                 |
| GOTERM_BP_ALL          | GO:0007601~visual perception                                                         |
| GOTERM_BP_ALL          | GO:0050953~sensory perception of light stimulus                                      |
| GOTERM_BP_ALL          | GO:0007600~sensory perception                                                        |
|                        |                                                                                      |
| Annotation Cluster 181 | Enrichment Score: 0.34441239425789444                                                |
| Category               | Term                                                                                 |
| GOTERM_BP_ALL          | GO:0006644~phospholipid metabolic process                                            |
| GOTERM_BP_ALL          | GO:1901615~organic hydroxy compound metabolic process                                |
| GOTERM_BP_ALL          | GO:0006066~alcohol metabolic process                                                 |
| GOTERM_BP_ALL          | GO:0008654~phospholipid biosynthetic process                                         |
| GOTERM_BP_ALL          | GO:0090407~organophosphate biosynthetic process                                      |
|                        |                                                                                      |
| Annotation Cluster 182 | Enrichment Score: 0.32115815963538275                                                |
| Category               | Term                                                                                 |
| GOTERM_BP_ALL          | GO:0006403~RNA localization                                                          |
| GOTERM_BP_ALL          | GO:0015931~nucleobase-containing compound transport                                  |
| GOTERM_BP_ALL          | GO:0050657~nucleic acid transport                                                    |
| GOTERM_BP_ALL          | GO:0050658~RNA transport                                                             |
| GOTERM_BP_ALL          | GO:0051236~establishment of RNA localization                                         |
|                        |                                                                                      |
| Annotation Cluster 183 | Enrichment Score: 0.30254801956009814                                                |
| Category               | Term                                                                                 |
| GOTERM_BP_ALL          | GO:1904064~positive regulation of cation transmembrane transport                     |
| GOTERM_BP_ALL          | GO:0034767~positive regulation of ion transmembrane transport                        |
| GOTERM_BP_ALL          | GO:0034764~positive regulation of transmembrane transport                            |
|                        |                                                                                      |
| Annotation Cluster 184 | Enrichment Score: 0.29203327291829345                                                |
| Category               | Term                                                                                 |
| GOTERM_BP_ALL          | GO:0006644~phospholipid metabolic process                                            |
| GOTERM_BP_ALL          | GO:0046486~glycerolipid metabolic process                                            |
| GOTERM_BP_ALL          | GO:0006650~glycerophospholipid metabolic process                                     |
|                        |                                                                                      |
| Annotation Cluster 185 | Enrichment Score: 0.24075939762448328                                                |
| Category               | Term                                                                                 |
| GOTERM_BP_ALL          | GO:0006457~protein folding                                                           |
| GOTERM_BP_ALL          | GO:0007188~adenylate cyclase-modulating G-protein coupled receptor signaling pathway |



|                        |                                                                                                                                      |
|------------------------|--------------------------------------------------------------------------------------------------------------------------------------|
| GOTERM_BP_ALL          | GO:0007187~G-protein coupled receptor signaling pathway, coupled to cyclic nucleotide second messenger                               |
| Annotation Cluster 186 | Enrichment Score: 0.23973962167126972                                                                                                |
| Category               | Term                                                                                                                                 |
| GOTERM_BP_ALL          | GO:0042113~B cell activation                                                                                                         |
| GOTERM_BP_ALL          | GO:0050871~positive regulation of B cell activation                                                                                  |
| GOTERM_BP_ALL          | GO:0002460~adaptive immune response based on somatic recombination of immune receptors built from immunoglobulin superfamily domains |
| GOTERM_BP_ALL          | GO:0050864~regulation of B cell activation                                                                                           |
| GOTERM_BP_ALL          | GO:0002250~adaptive immune response                                                                                                  |
| Annotation Cluster 187 | Enrichment Score: 0.14615944222136285                                                                                                |
| Category               | Term                                                                                                                                 |
| GOTERM_BP_ALL          | GO:0032496~response to lipopolysaccharide                                                                                            |
| GOTERM_BP_ALL          | GO:0002237~response to molecule of bacterial origin                                                                                  |
| GOTERM_BP_ALL          | GO:0009617~response to bacterium                                                                                                     |
| Annotation Cluster 188 | Enrichment Score: 0.11781501682953328                                                                                                |
| Category               | Term                                                                                                                                 |
| GOTERM_BP_ALL          | GO:0042254~ribosome biogenesis                                                                                                       |
| GOTERM_BP_ALL          | GO:0022613~ribonucleoprotein complex biogenesis                                                                                      |
| GOTERM_BP_ALL          | GO:0034660~ncRNA metabolic process                                                                                                   |
| GOTERM_BP_ALL          | GO:0034470~ncRNA processing                                                                                                          |
| Annotation Cluster 189 | Enrichment Score: 0.10465604094187994                                                                                                |
| Category               | Term                                                                                                                                 |
| GOTERM_BP_ALL          | GO:0022613~ribonucleoprotein complex biogenesis                                                                                      |
| GOTERM_BP_ALL          | GO:0022618~ribonucleoprotein complex assembly                                                                                        |
| GOTERM_BP_ALL          | GO:0071826~ribonucleoprotein complex subunit organization                                                                            |
| Annotation Cluster 190 | Enrichment Score: 0.0824014777718883                                                                                                 |
| Category               | Term                                                                                                                                 |
| GOTERM_BP_ALL          | GO:0009100~glycoprotein metabolic process                                                                                            |
| GOTERM_BP_ALL          | GO:1901137~carbohydrate derivative biosynthetic process                                                                              |
| GOTERM_BP_ALL          | GO:0009101~glycoprotein biosynthetic process                                                                                         |
