# Supplementary material for: Meta-analysis of 46,000 germline de novo mutations linked to human inherited disease
Source: Springer Nature journal article supplement (doi:10.1186/s40246-024-00587-8), 2024-02-23

**Additional file 4.** REVEL scores for the two groups of HGMD disease-causing missense mutations (5,307 DNM versus 32,605 non-DNM). Purple bar indicates the proportion of dataset overlap between DNM and non-DNM for a specific range of scores; red indicates enrichment of the DNM; blue denotes enrichment of the non-DNM set.

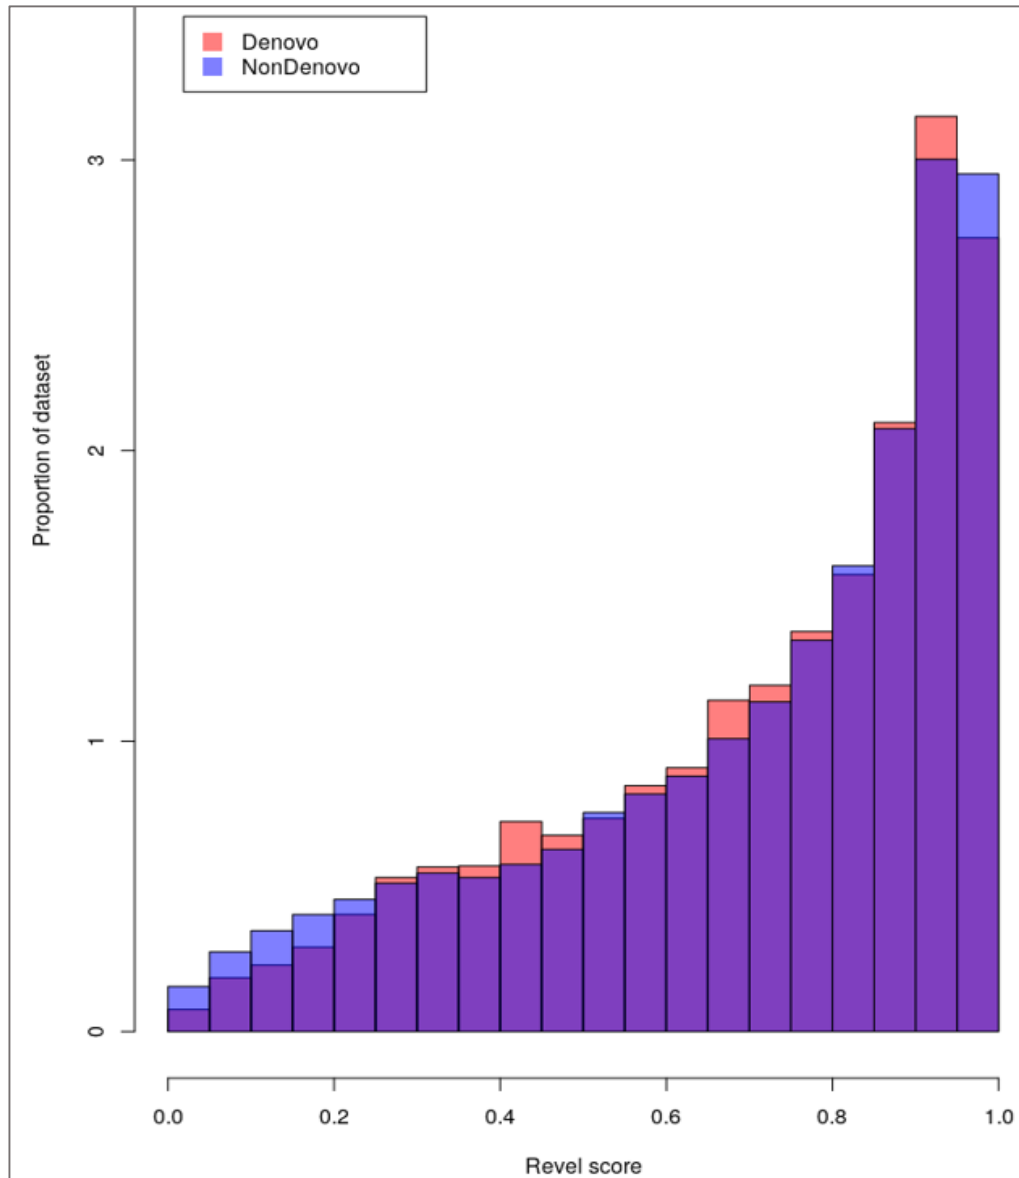

Supplement: MOESM3 [file 40246_2024_587_MOESM3_ESM.pdf]
