# Supplementary material for: Meta-analysis of 46,000 germline de novo mutations linked to human inherited disease
Source: Springer Nature journal article supplement (doi:10.1186/s40246-024-00587-8), 2024-02-23
Supplement: MOESM4 [file 40246_2024_587_MOESM4_ESM.pdf]

**Additional file 2.** Relative mutability of 187 genes enriched for DNMs.

| <b>Gene Symbol</b> | <b>Frequency of DNMs</b> | <b>Coding length (bp)</b> | <b>Relative mutability (DNM frequency/coding length)*100</b> | <b>Relative mutability (DNM frequency/expected Genovo missense from Bethune et al. 2022)</b> |
|--------------------|--------------------------|---------------------------|--------------------------------------------------------------|----------------------------------------------------------------------------------------------|
| <i>H3-3A</i>       | 29                       | 411                       | 7.056                                                        | 0.300                                                                                        |
| <i>DDX3X</i>       | 134                      | 1986                      | 6.747                                                        |                                                                                              |
| <i>CSNK2B</i>      | 43                       | 648                       | 6.636                                                        | 0.343                                                                                        |
| <i>PURA</i>        | 61                       | 969                       | 6.295                                                        |                                                                                              |
| <i>ZC4H2</i>       | 40                       | 675                       | 5.926                                                        |                                                                                              |
| <i>STXBP1</i>      | 95                       | 1812                      | 5.243                                                        |                                                                                              |
| <i>SCN1A</i>       | 311                      | 6030                      | 5.158                                                        |                                                                                              |
| <i>SATB2</i>       | 104                      | 2202                      | 4.723                                                        |                                                                                              |
| <i>H3-3B</i>       | 19                       | 411                       | 4.623                                                        | 0.189                                                                                        |
| <i>TUBA1A</i>      | 60                       | 1356                      | 4.425                                                        | 0.216                                                                                        |
| <i>SLC35A2</i>     | 49                       | 1182                      | 4.146                                                        |                                                                                              |
| <i>CTNNB1</i>      | 94                       | 2346                      | 4.007                                                        | 0.207                                                                                        |
| <i>VAMP2</i>       | 14                       | 351                       | 3.989                                                        | 0.202                                                                                        |
| <i>GNAO1</i>       | 42                       | 1065                      | 3.944                                                        | 0.177                                                                                        |
| <i>MECP2</i>       | 57                       | 1461                      | 3.901                                                        |                                                                                              |
| <i>DYRK1A</i>      | 84                       | 2292                      | 3.665                                                        |                                                                                              |
| <i>GATAD2B</i>     | 64                       | 1782                      | 3.591                                                        | 0.181                                                                                        |
| <i>WDR45</i>       | 39                       | 1086                      | 3.591                                                        |                                                                                              |
| <i>SLC6A1</i>      | 64                       | 1800                      | 3.556                                                        | 0.170                                                                                        |
| <i>H1-4</i>        | 22                       | 660                       | 3.333                                                        |                                                                                              |
| <i>KCNQ2</i>       | 86                       | 2619                      | 3.284                                                        | 0.155                                                                                        |
| <i>SOX11</i>       | 40                       | 1326                      | 3.017                                                        |                                                                                              |
| <i>ARID1B</i>      | 209                      | 6999                      | 2.986                                                        |                                                                                              |
| <i>SOX10</i>       | 41                       | 1401                      | 2.926                                                        | 0.131                                                                                        |
| <i>ACTB</i>        | 33                       | 1128                      | 2.926                                                        |                                                                                              |
| <i>SYNGAP1</i>     | 117                      | 4032                      | 2.902                                                        |                                                                                              |
| <i>H4C5</i>        | 9                        | 312                       | 2.885                                                        |                                                                                              |
| <i>PCDH19</i>      | 95                       | 3447                      | 2.756                                                        |                                                                                              |
| <i>GABRB3</i>      | 39                       | 1422                      | 2.743                                                        | 0.142                                                                                        |
| <i>NR2F1</i>       | 34                       | 1272                      | 2.673                                                        | 0.113                                                                                        |
| <i>HNRNPU</i>      | 65                       | 2478                      | 2.623                                                        |                                                                                              |
| <i>SCN2A</i>       | 154                      | 6018                      | 2.559                                                        |                                                                                              |
| <i>PTEN</i>        | 31                       | 1212                      | 2.558                                                        | 0.146                                                                                        |
| <i>FBXO11</i>      | 71                       | 2784                      | 2.550                                                        | 0.158                                                                                        |
| <i>EBF3</i>        | 41                       | 1656                      | 2.476                                                        |                                                                                              |
| <i>RB1</i>         | 68                       | 2787                      | 2.440                                                        | 0.145                                                                                        |
| <i>SLC2A1</i>      | 36                       | 1479                      | 2.434                                                        | 0.111                                                                                        |
| <i>RAC3</i>        | 14                       | 579                       | 2.418                                                        | 0.105                                                                                        |
| <i>FOXP1</i>       | 49                       | 2034                      | 2.409                                                        |                                                                                              |
| <i>NAA10</i>       | 17                       | 708                       | 2.401                                                        |                                                                                              |
| <i>FOXG1</i>       | 35                       | 1470                      | 2.381                                                        |                                                                                              |
| <i>EIF5A</i>       | 11                       | 465                       | 2.366                                                        | 0.116                                                                                        |
| <i>PAFAH1B1</i>    | 29                       | 1233                      | 2.352                                                        | 0.124                                                                                        |

|                |     |      |       |        |
|----------------|-----|------|-------|--------|
| <i>SHANK3</i>  | 127 | 5421 | 2.343 |        |
| <i>PHEX</i>    | 52  | 2250 | 2.311 |        |
| <i>CDKL5</i>   | 71  | 3093 | 2.296 |        |
| <i>GABRB2</i>  | 35  | 1539 | 2.274 |        |
| <i>TBLXR1</i>  | 35  | 1545 | 2.265 | 0.136  |
| <i>PBX1</i>    | 29  | 1293 | 2.243 | 0.120  |
| <i>HNRNPK</i>  | 31  | 1395 | 2.222 |        |
| <i>ACTA1</i>   | 25  | 1134 | 2.205 | 0.085  |
| <i>WDR26</i>   | 43  | 1986 | 2.165 |        |
| <i>NF1</i>     | 179 | 8457 | 2.117 |        |
| <i>TP53</i>    | 25  | 1182 | 2.115 | 0.098  |
| <i>snap25b</i> | 13  | 621  | 2.093 | 0.0972 |
| <i>ANKRD11</i> | 167 | 7992 | 2.090 | 0.102  |
| <i>RAC1</i>    | 13  | 636  | 2.044 |        |
| <i>GRIN2B</i>  | 91  | 4455 | 2.043 | 0.097  |
| <i>TLK2</i>    | 45  | 2253 | 1.997 | 0.111  |
| <i>ACTG1</i>   | 22  | 1128 | 1.950 | 0.079  |
| <i>DEAF1</i>   | 33  | 1698 | 1.943 | 0.099  |
| <i>ATP1A3</i>  | 59  | 3042 | 1.940 |        |
| <i>PPP2CA</i>  | 18  | 930  | 1.935 | 0.098  |
| <i>DNMT3A</i>  | 53  | 2739 | 1.935 |        |
| <i>CDC42</i>   | 11  | 576  | 1.910 |        |
| <i>GABRA1</i>  | 26  | 1371 | 1.896 |        |
| <i>IGLL5</i>   | 12  | 645  | 1.860 | 0.132  |
| <i>CREBBP</i>  | 136 | 7329 | 1.856 | 0.093  |
| <i>HDAC8</i>   | 21  | 1134 | 1.852 |        |
| <i>ARF3</i>    | 10  | 546  | 1.832 | 0.088  |
| <i>POGZ</i>    | 77  | 4233 | 1.819 | 0.095  |
| <i>NUS1</i>    | 16  | 882  | 1.814 | 0.114  |
| <i>INS</i>     | 6   | 333  | 1.802 | 0.097  |
| <i>MYT1L</i>   | 64  | 3555 | 1.800 |        |
| <i>HNF1B</i>   | 30  | 1674 | 1.792 |        |
| <i>TCF4</i>    | 36  | 2016 | 1.786 | 0.090  |
| <i>CSNK2A1</i> | 21  | 1176 | 1.786 |        |
| <i>GNB1</i>    | 18  | 1023 | 1.760 | 0.081  |
| <i>YWHAG</i>   | 13  | 744  | 1.747 | 0.074  |
| <i>EFTUD2</i>  | 51  | 2919 | 1.747 | 0.089  |
| <i>RPS26</i>   | 6   | 348  | 1.724 |        |
| <i>GNAI1</i>   | 18  | 1065 | 1.690 |        |
| <i>PLP1</i>    | 14  | 834  | 1.679 |        |
| <i>TWIST1</i>  | 10  | 609  | 1.642 | 0.080  |
| <i>PHF6</i>    | 18  | 1098 | 1.639 |        |
| <i>GABRG2</i>  | 23  | 1404 | 1.638 |        |
| <i>NFIX</i>    | 25  | 1533 | 1.631 |        |
| <i>PSMD12</i>  | 22  | 1371 | 1.605 | 0.089  |
| <i>H4C3</i>    | 5   | 312  | 1.603 |        |
| <i>H4C11</i>   | 5   | 312  | 1.603 |        |
| <i>NR5A1</i>   | 22  | 1386 | 1.587 | 0.080  |
| <i>FOXF1</i>   | 18  | 1140 | 1.579 | 0.072  |

|               |     |      |       |       |
|---------------|-----|------|-------|-------|
| <i>HBB</i>    | 7   | 444  | 1.577 | 0.088 |
| <i>SYT1</i>   | 20  | 1269 | 1.576 | 0.088 |
| <i>ZBTB20</i> | 35  | 2226 | 1.572 |       |
| <i>LAT</i>    | 11  | 702  | 1.567 | 0.078 |
| <i>PUF60</i>  | 26  | 1680 | 1.548 | 0.076 |
| <i>KMT5B</i>  | 41  | 2658 | 1.543 | 0.085 |
| <i>CHD2</i>   | 84  | 5487 | 1.531 | 0.083 |
| <i>OTC</i>    | 16  | 1065 | 1.502 |       |
| <i>MED13L</i> | 99  | 6633 | 1.493 | 0.079 |
| <i>COL4A1</i> | 74  | 5010 | 1.477 | 0.074 |
| <i>AHDC1</i>  | 71  | 4812 | 1.475 |       |
| <i>SOX2</i>   | 14  | 954  | 1.468 |       |
| <i>TBR1</i>   | 30  | 2049 | 1.464 | 0.070 |
| <i>NAA15</i>  | 38  | 2601 | 1.461 | 0.091 |
| <i>TCEAL1</i> | 7   | 480  | 1.458 |       |
| <i>PDHA1</i>  | 17  | 1173 | 1.449 |       |
| <i>PMP22</i>  | 7   | 483  | 1.449 | 0.076 |
| <i>EHMT1</i>  | 56  | 3897 | 1.437 | 0.065 |
| <i>EEF1A2</i> | 20  | 1392 | 1.437 | 0.066 |
| <i>KCNB1</i>  | 37  | 2577 | 1.436 | 0.070 |
| <i>MEIS2</i>  | 17  | 1185 | 1.435 |       |
| <i>MEF2C</i>  | 20  | 1422 | 1.406 | 0.076 |
| <i>TSC2</i>   | 75  | 5424 | 1.383 | 0.066 |
| <i>COL1A1</i> | 60  | 4395 | 1.365 | 0.062 |
| <i>CAMK2A</i> | 20  | 1470 | 1.361 |       |
| <i>SMC1A</i>  | 50  | 3702 | 1.351 |       |
| <i>MITF</i>   | 17  | 1260 | 1.349 |       |
| <i>ASXL3</i>  | 91  | 6747 | 1.349 | 0.079 |
| <i>PPP3CA</i> | 21  | 1566 | 1.341 | 0.074 |
| <i>TAOK1</i>  | 40  | 3006 | 1.331 | 0.071 |
| <i>GATA2</i>  | 19  | 1443 | 1.317 | 0.060 |
| <i>SCN8A</i>  | 78  | 5943 | 1.312 |       |
| <i>EIF4A2</i> | 16  | 1224 | 1.307 | 0.069 |
| <i>LMNA</i>   | 26  | 1995 | 1.303 | 0.057 |
| <i>RRAS2</i>  | 8   | 615  | 1.301 | 0.069 |
| <i>QRICH1</i> | 30  | 2331 | 1.287 |       |
| <i>WAC</i>    | 25  | 1944 | 1.286 | 0.075 |
| <i>PAX2</i>   | 16  | 1254 | 1.276 |       |
| <i>FBXW7</i>  | 27  | 2124 | 1.271 |       |
| <i>PRRT2</i>  | 13  | 1023 | 1.271 | 0.065 |
| <i>FGFR1</i>  | 31  | 2469 | 1.256 | 0.063 |
| <i>IQSEC2</i> | 56  | 4467 | 1.254 |       |
| <i>MSL3</i>   | 14  | 1119 | 1.251 |       |
| <i>NKX2-1</i> | 15  | 1206 | 1.244 | 0.057 |
| <i>FBN1</i>   | 107 | 8616 | 1.242 | 0.063 |
| <i>FOXL2</i>  | 14  | 1131 | 1.238 |       |
| <i>ACTG2</i>  | 14  | 1131 | 1.238 | 0.060 |
| <i>NFIB</i>   | 18  | 1485 | 1.212 | 0.071 |
| <i>NR2F2</i>  | 15  | 1245 | 1.205 | 0.056 |

|                  |     |       |       |       |
|------------------|-----|-------|-------|-------|
| <i>POU3F3</i>    | 18  | 1503  | 1.198 |       |
| <i>TUBB2B</i>    | 16  | 1338  | 1.196 | 0.061 |
| <i>SOX4</i>      | 17  | 1425  | 1.193 |       |
| <i>SPAST</i>     | 22  | 1851  | 1.189 | 0.065 |
| <i>ZIC2</i>      | 19  | 1599  | 1.188 | 0.062 |
| <i>stxbp1tv2</i> | 21  | 1785  | 1.176 | 0.057 |
| <i>DNM1L</i>     | 26  | 2211  | 1.176 | 0.064 |
| <i>UBE3A</i>     | 30  | 2559  | 1.172 |       |
| <i>COL2A1</i>    | 52  | 4464  | 1.165 | 0.055 |
| <i>TCF20</i>     | 68  | 5883  | 1.156 |       |
| <i>mssl3tv1</i>  | 18  | 1566  | 1.149 |       |
| <i>OTX2</i>      | 10  | 870   | 1.149 |       |
| <i>SET</i>       | 10  | 873   | 1.145 |       |
| <i>COL6A2</i>    | 35  | 3060  | 1.144 | 0.047 |
| <i>ATP6V1A</i>   | 21  | 1854  | 1.133 | 0.060 |
| <i>IRF2BPL</i>   | 27  | 2391  | 1.129 |       |
| <i>RALA</i>      | 7   | 621   | 1.127 | 0.064 |
| <i>YY1</i>       | 14  | 1245  | 1.124 | 0.057 |
| <i>SMARCB1</i>   | 13  | 1158  | 1.123 |       |
| <i>CASK</i>      | 31  | 2766  | 1.121 |       |
| <i>RPL5</i>      | 10  | 894   | 1.119 | 0.057 |
| <i>ADNP</i>      | 37  | 3309  | 1.118 |       |
| <i>NR4A2</i>     | 20  | 1797  | 1.113 | 0.053 |
| <i>CHD7</i>      | 100 | 8994  | 1.112 | 0.062 |
| <i>DPF2</i>      | 13  | 1176  | 1.105 | 0.052 |
| <i>IGF2</i>      | 6   | 543   | 1.105 | 0.045 |
| <i>TAB2</i>      | 23  | 2082  | 1.105 |       |
| <i>GRIN1</i>     | 31  | 2817  | 1.100 | 0.048 |
| <i>ZEB2</i>      | 40  | 3645  | 1.097 |       |
| <i>CLCN4</i>     | 25  | 2283  | 1.095 |       |
| <i>DHDDS</i>     | 11  | 1005  | 1.095 |       |
| <i>GRIA2</i>     | 29  | 2652  | 1.094 | 0.059 |
| <i>KMT2B</i>     | 89  | 8148  | 1.092 | 0.055 |
| <i>YWHAZ</i>     | 8   | 738   | 1.084 |       |
| <i>KMT2A</i>     | 129 | 11919 | 1.082 | 0.058 |
| <i>NOVA2</i>     | 16  | 1479  | 1.082 | 0.058 |
| <i>SSR4</i>      | 6   | 555   | 1.081 |       |
| <i>ANK1</i>      | 61  | 5643  | 1.081 | 0.051 |
| <i>HMGB1</i>     | 7   | 648   | 1.080 | 0.083 |
| <i>SHH</i>       | 15  | 1389  | 1.080 | 0.057 |
| <i>RFX3</i>      | 24  | 2250  | 1.067 |       |
| <i>KAT6A</i>     | 64  | 6015  | 1.064 | 0.057 |
| <i>KRAS</i>      | 6   | 567   | 1.058 | 0.062 |
| <i>ZMYND11</i>   | 19  | 1809  | 1.050 |       |
| <i>GATA3</i>     | 14  | 1335  | 1.049 | 0.048 |
| <i>CUL3</i>      | 24  | 2307  | 1.040 | 0.057 |
